# Supplementary material
Source: MDPI journal article supplement (https://www.mdpi.com/1424-2818/15/11/1129)

Figure S3: Species distributions (purple dots = occurrences from GBIF, red diamonds = occurrences from BOLD)

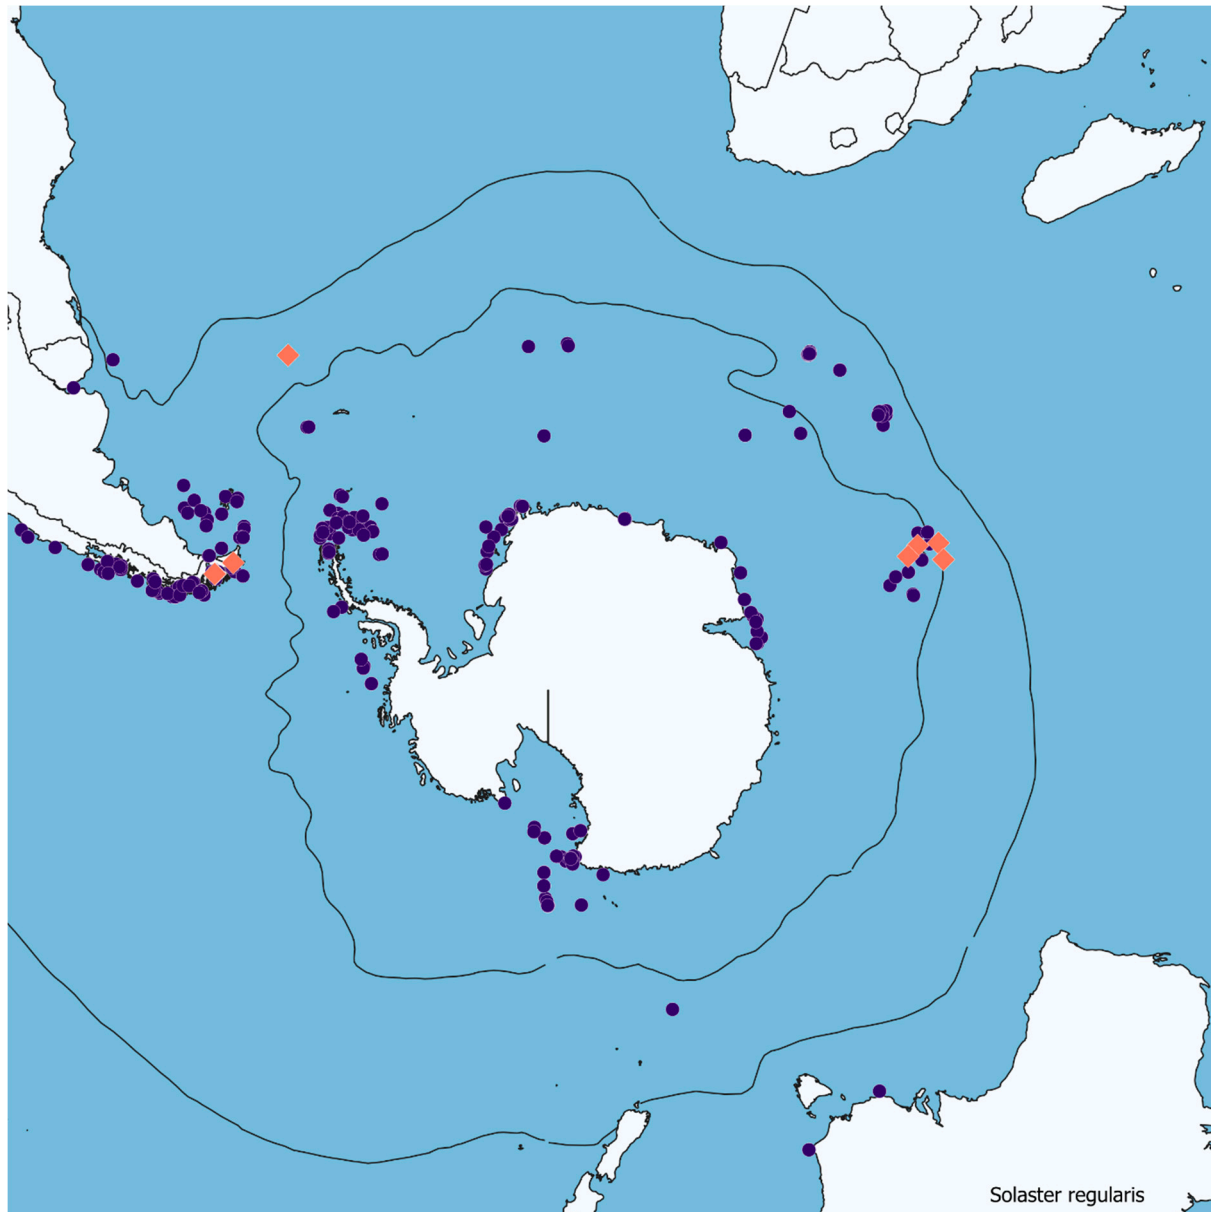

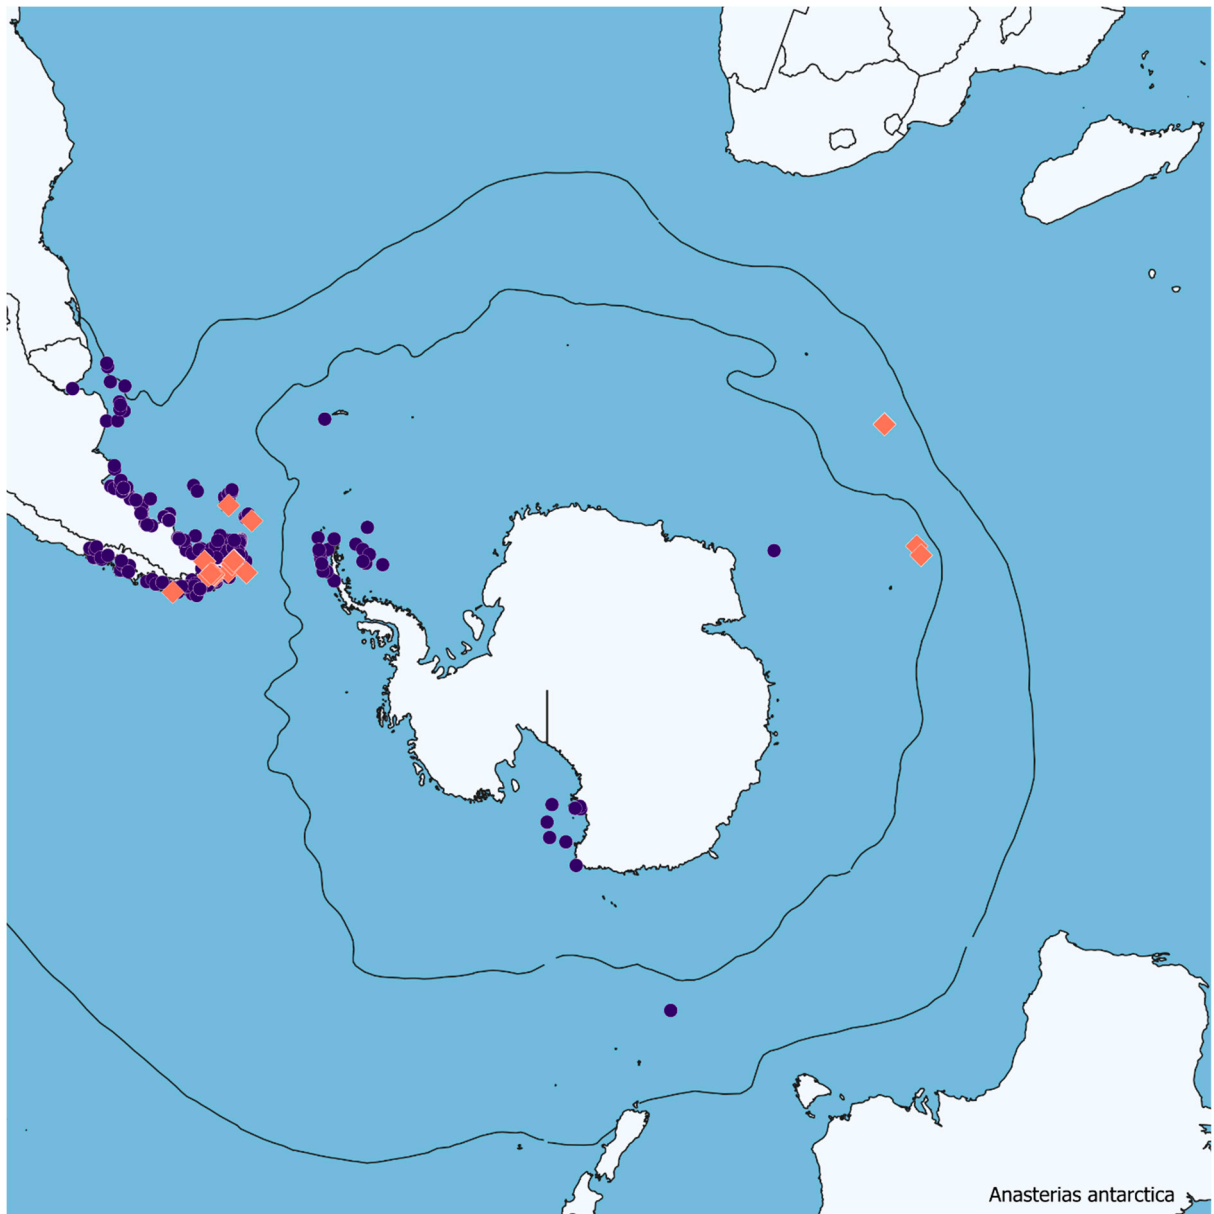

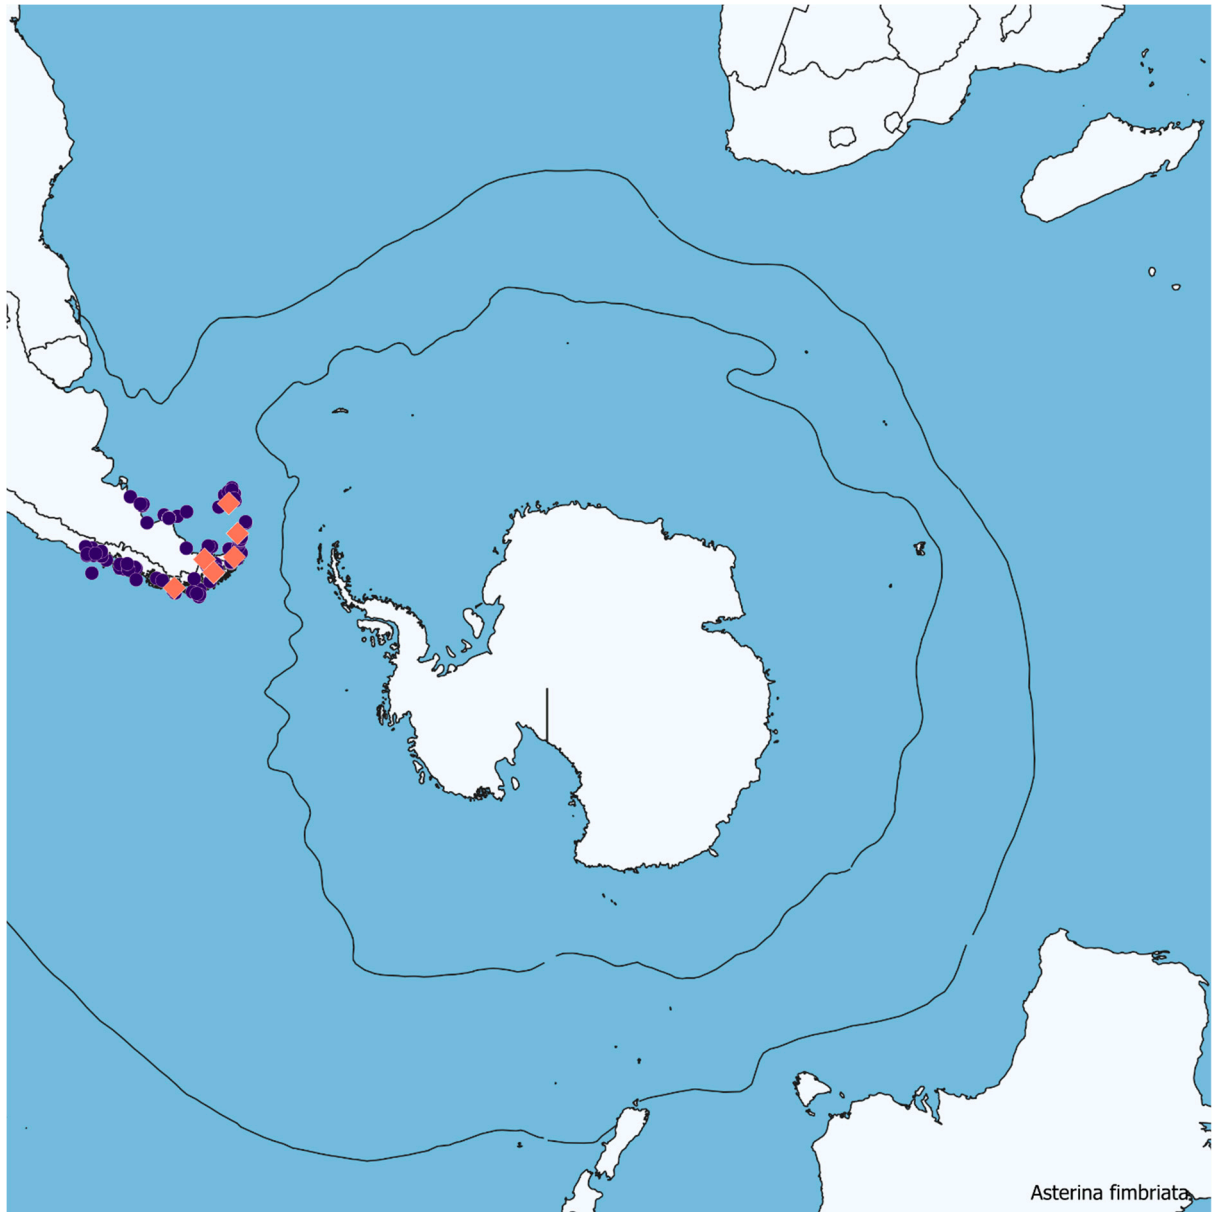

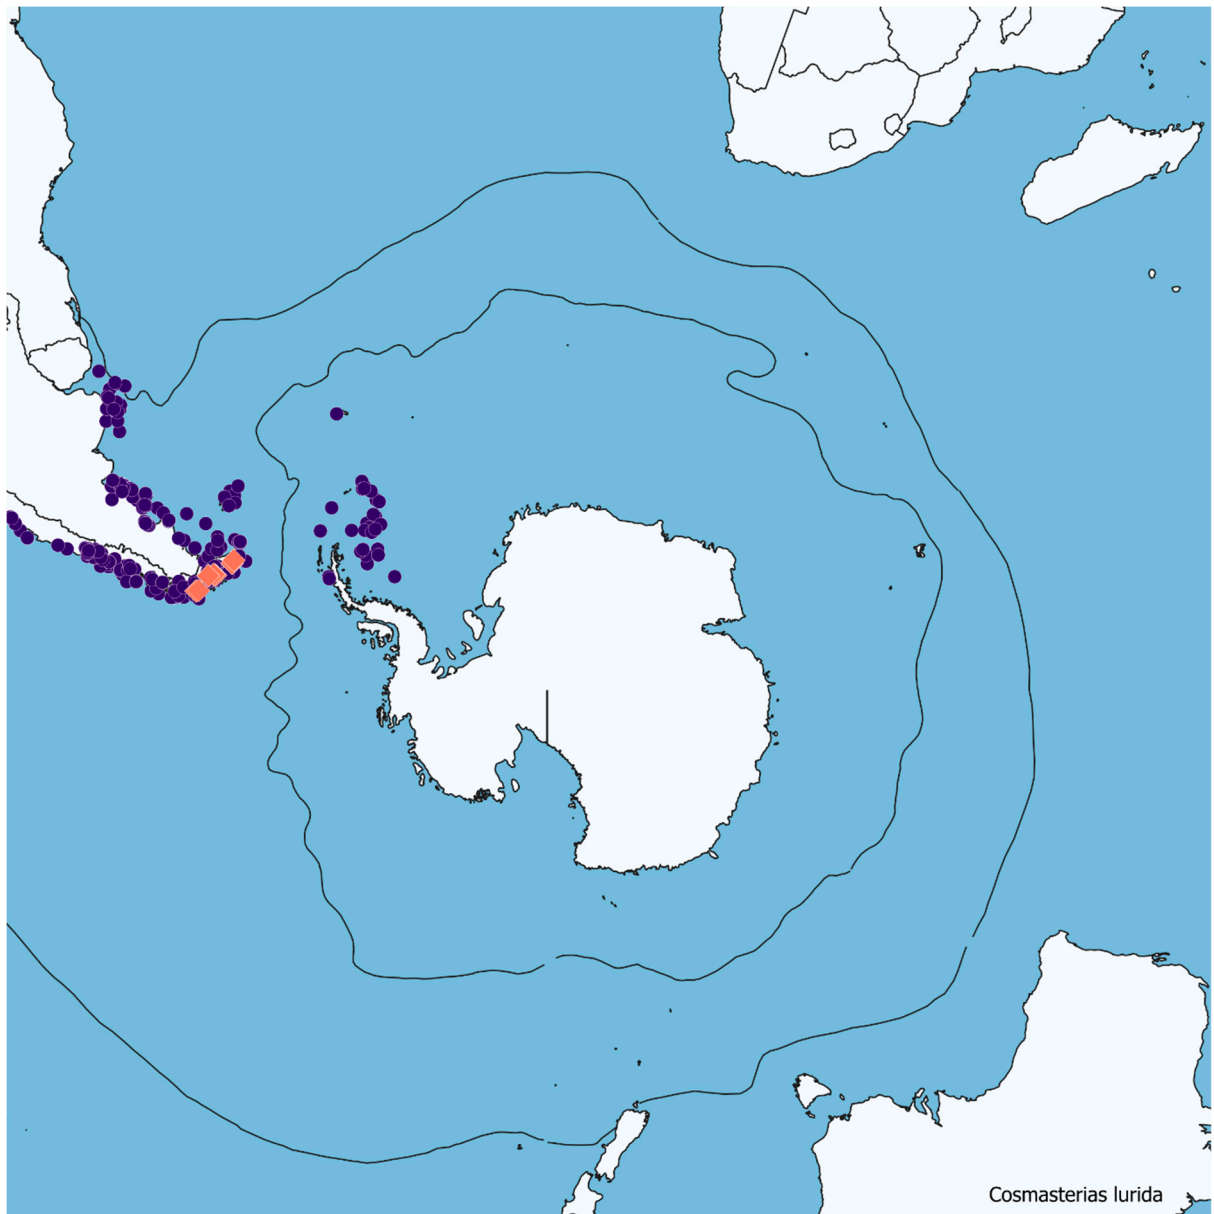

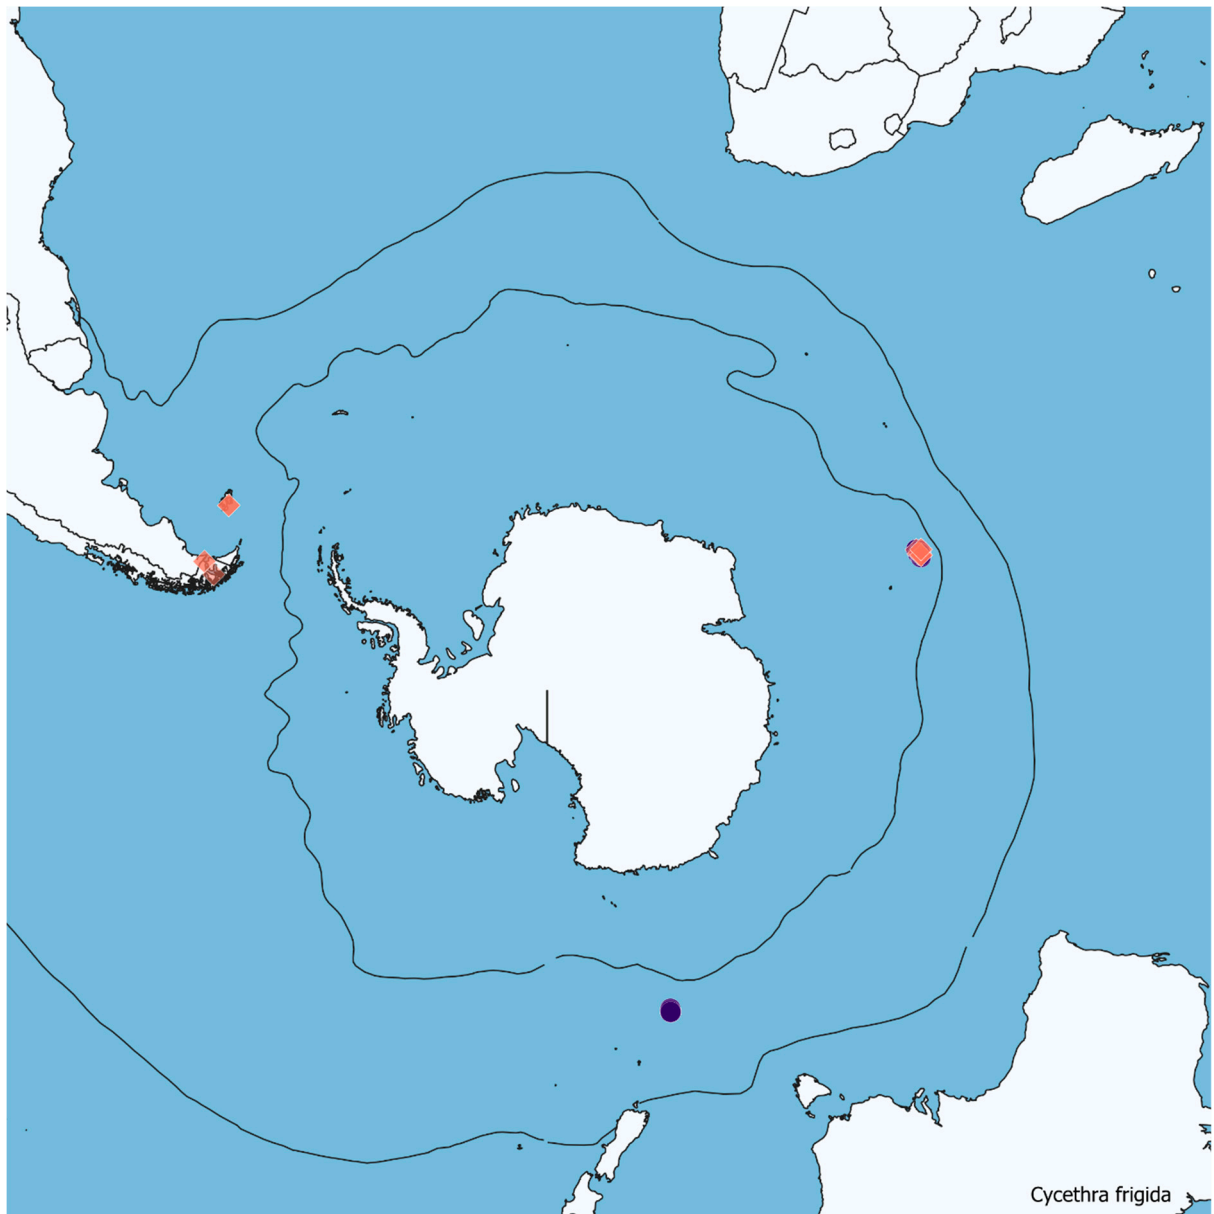

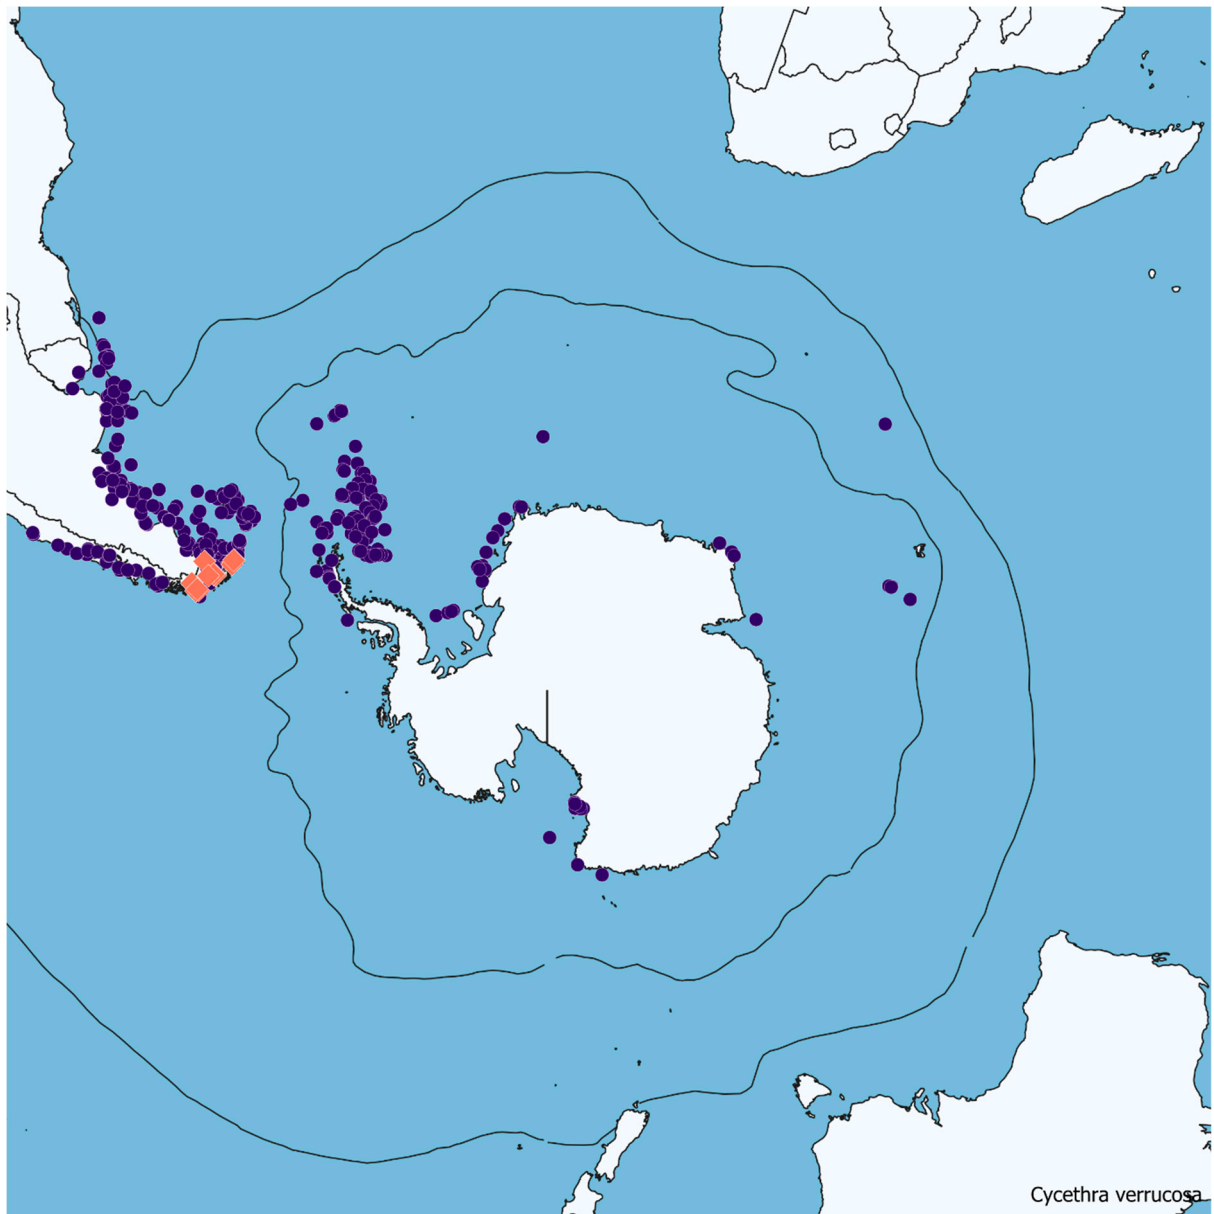

*Cycethra verrucosa*

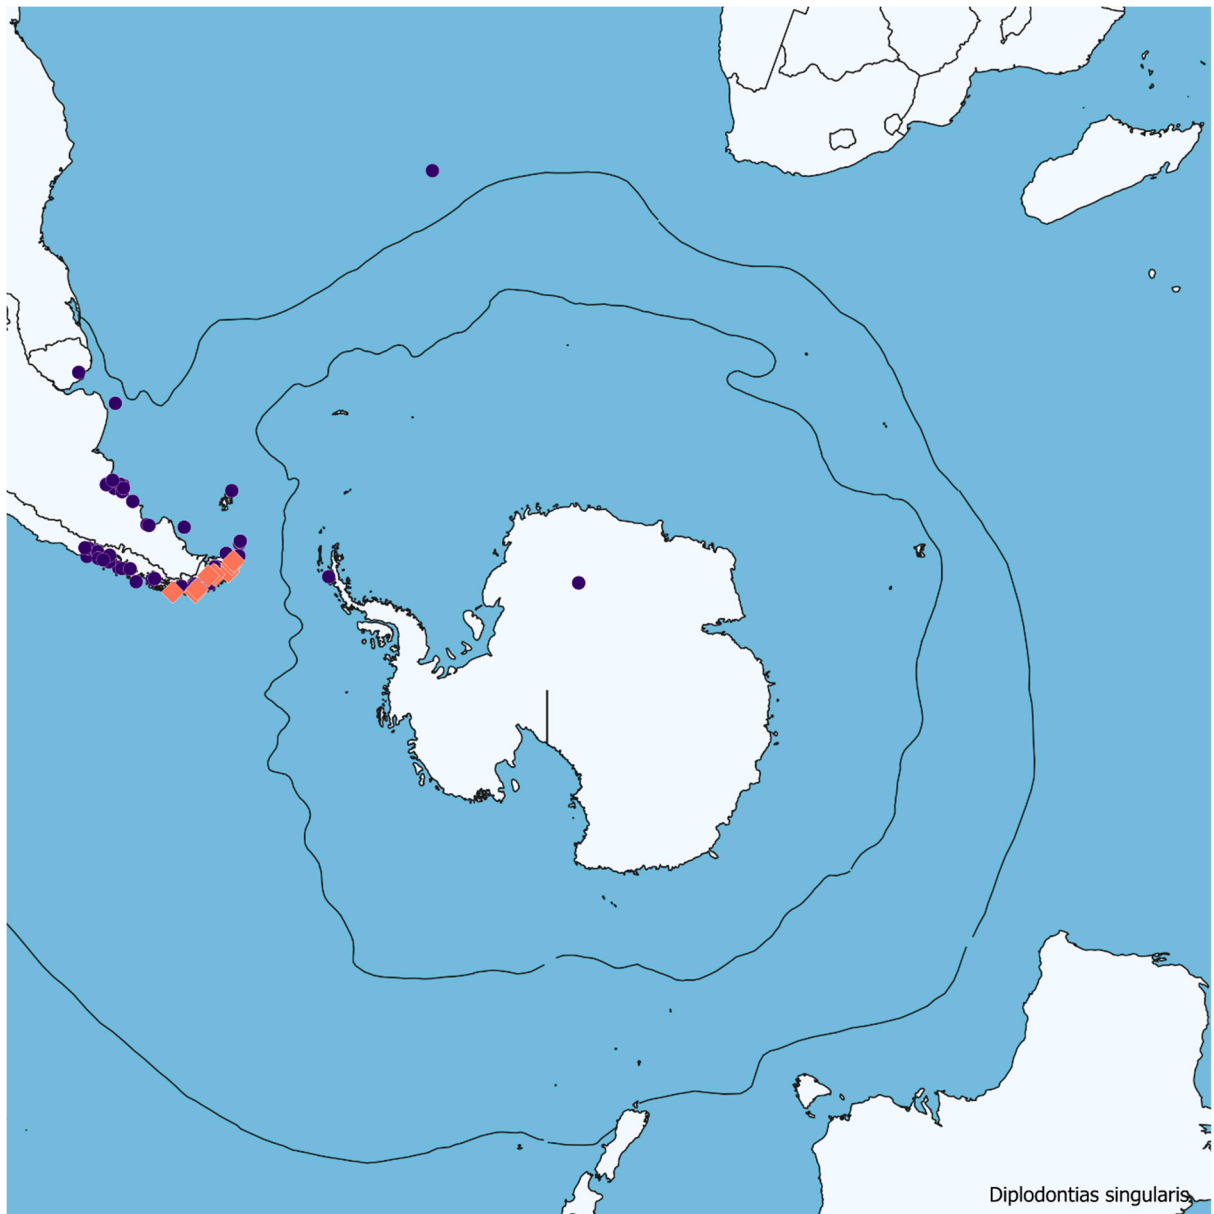

*Diplostomias singularis*

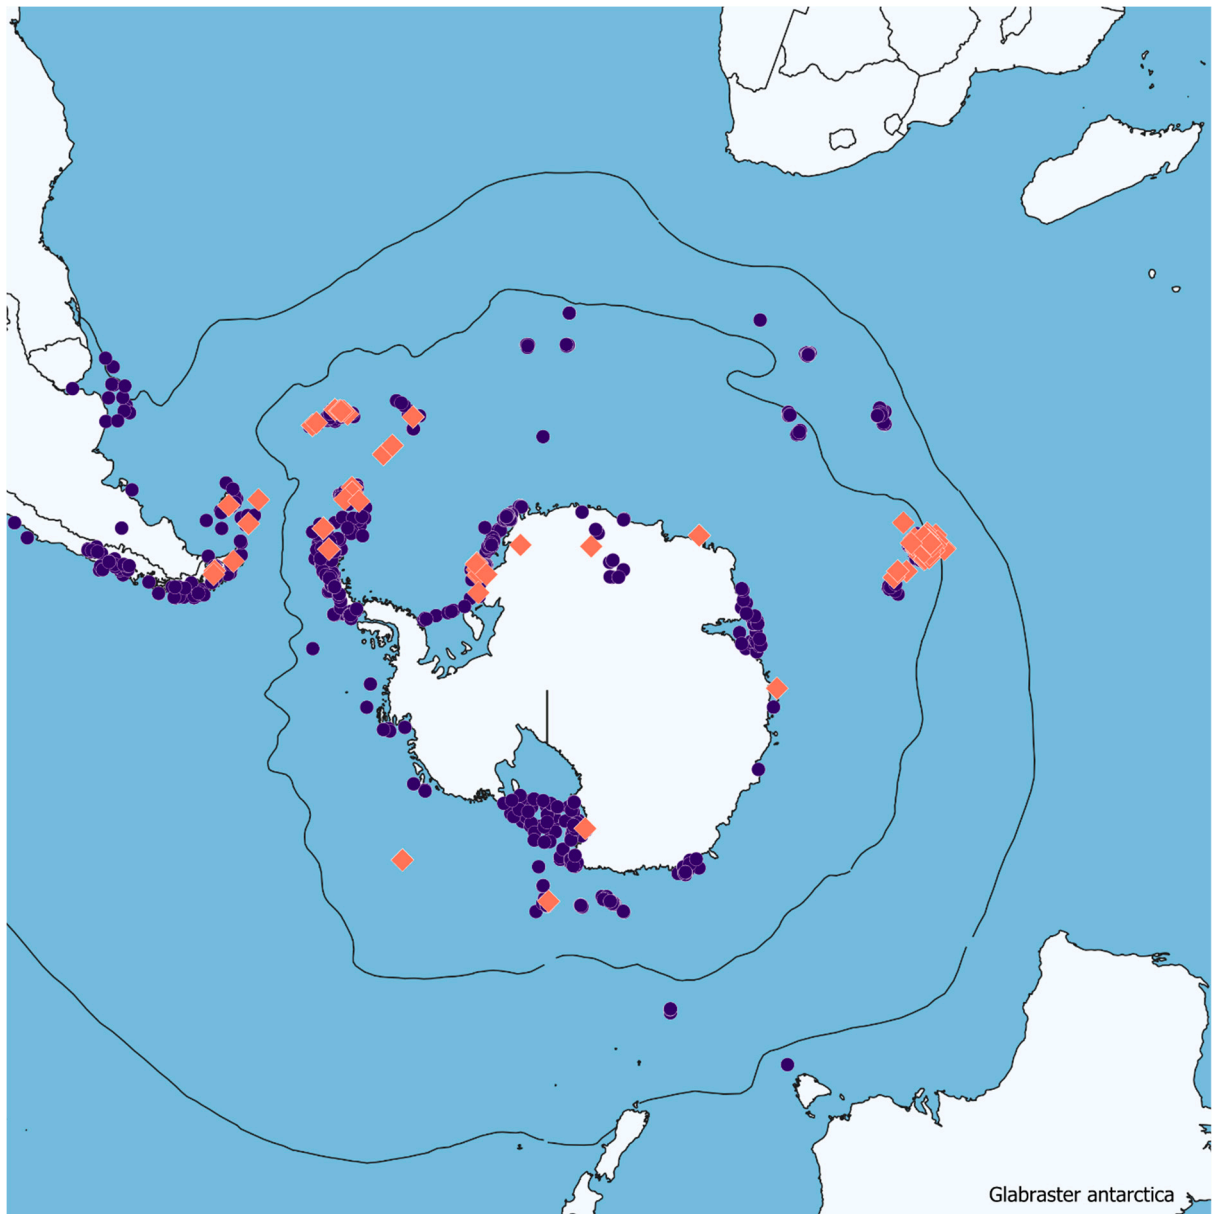



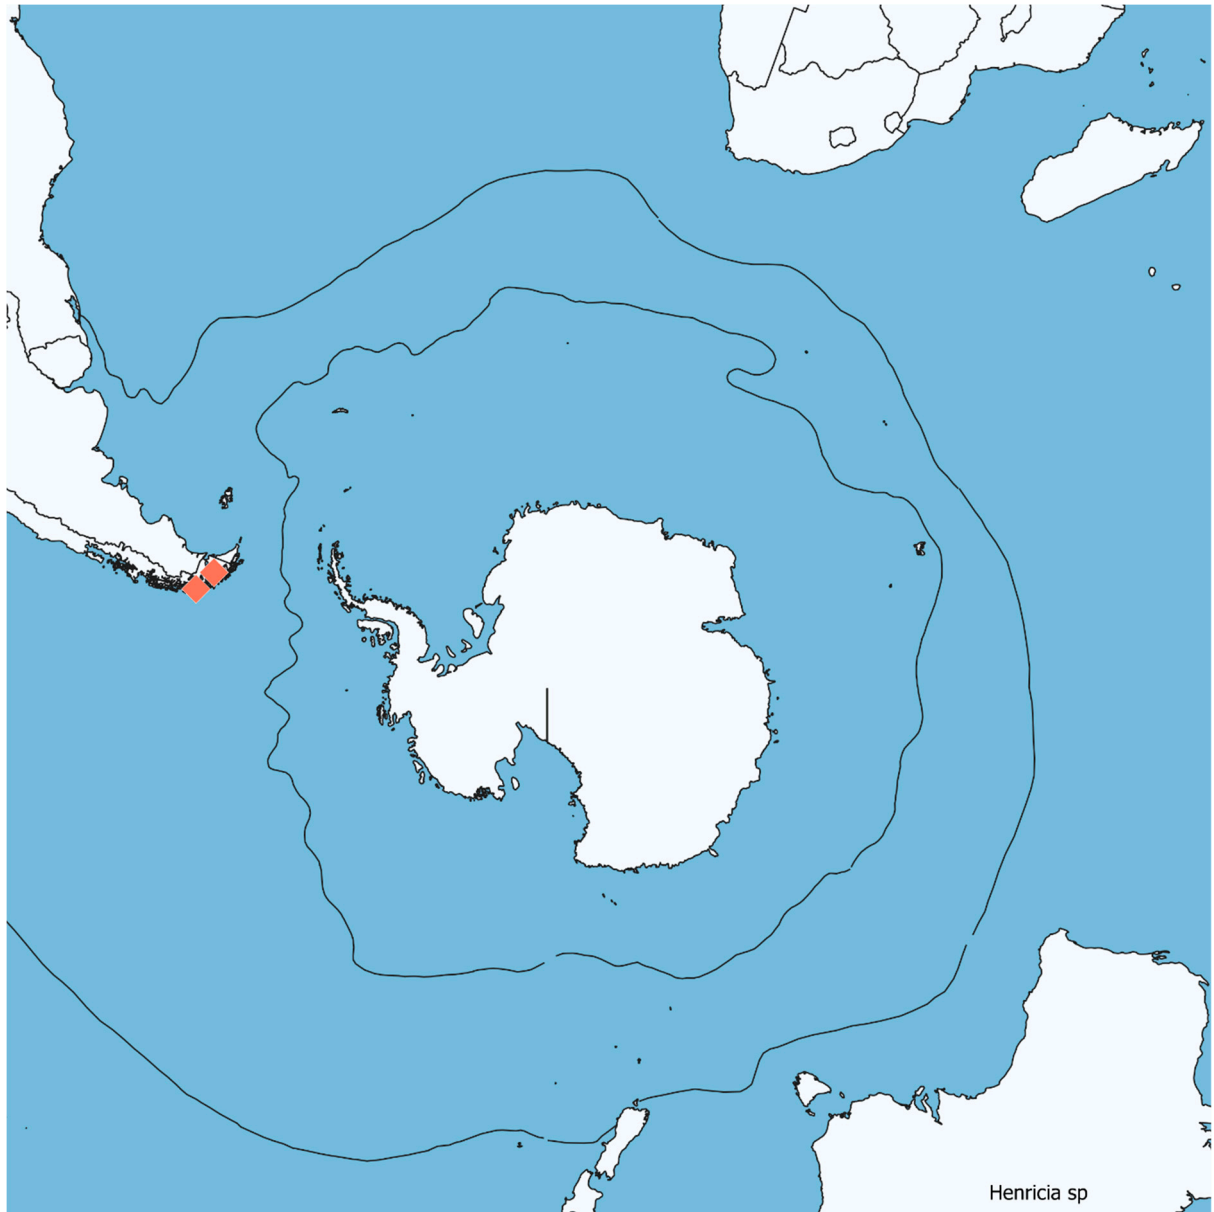

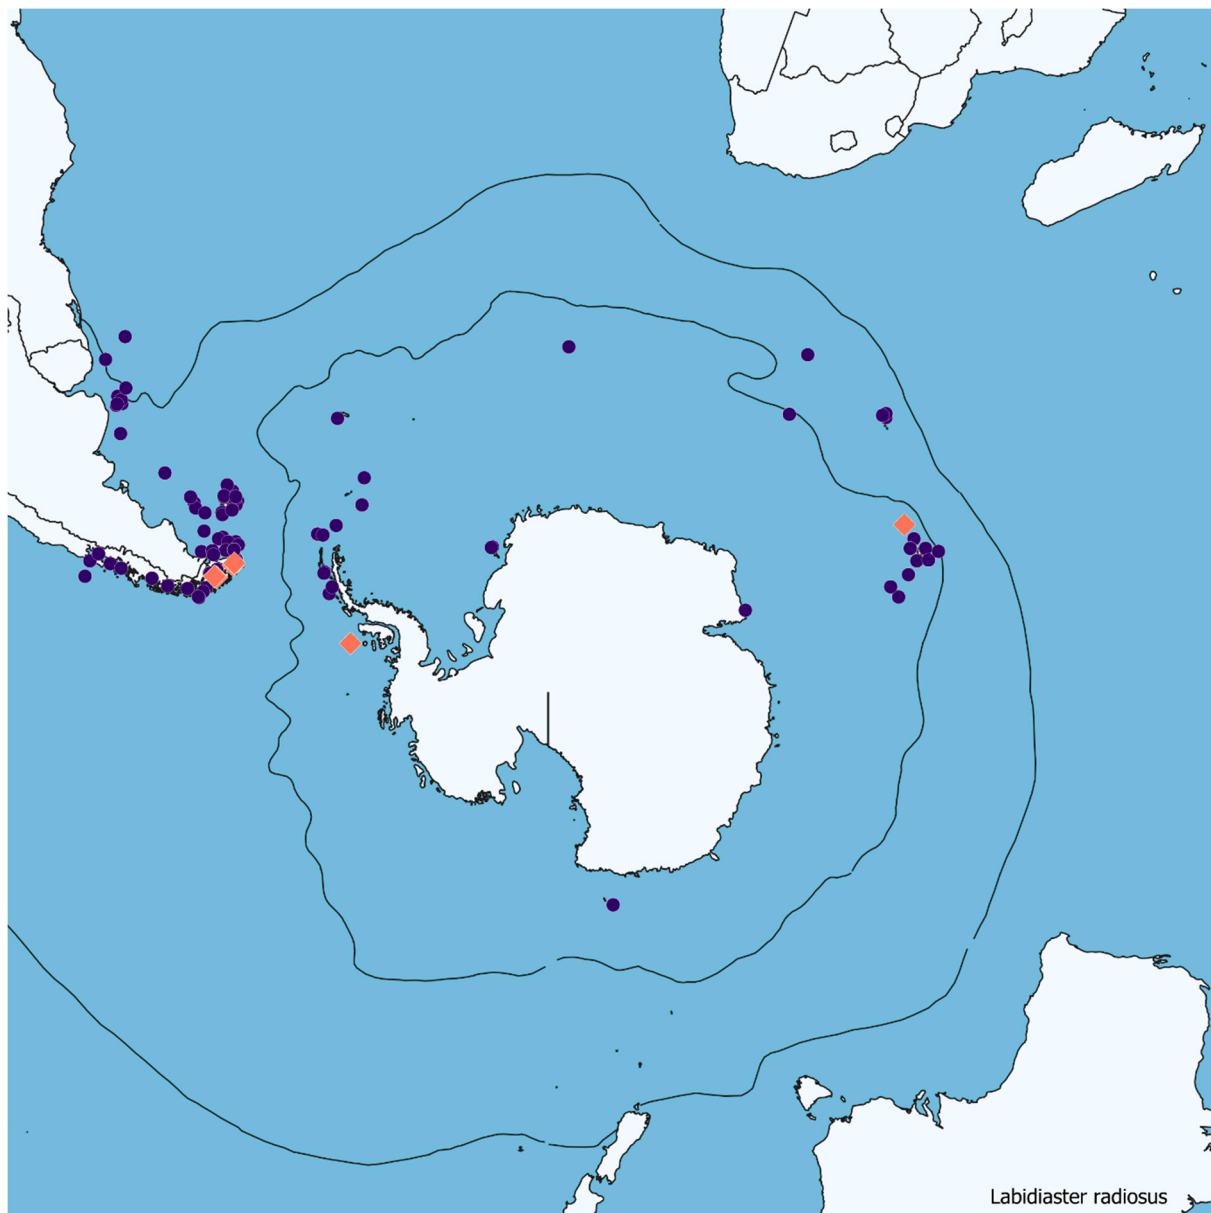

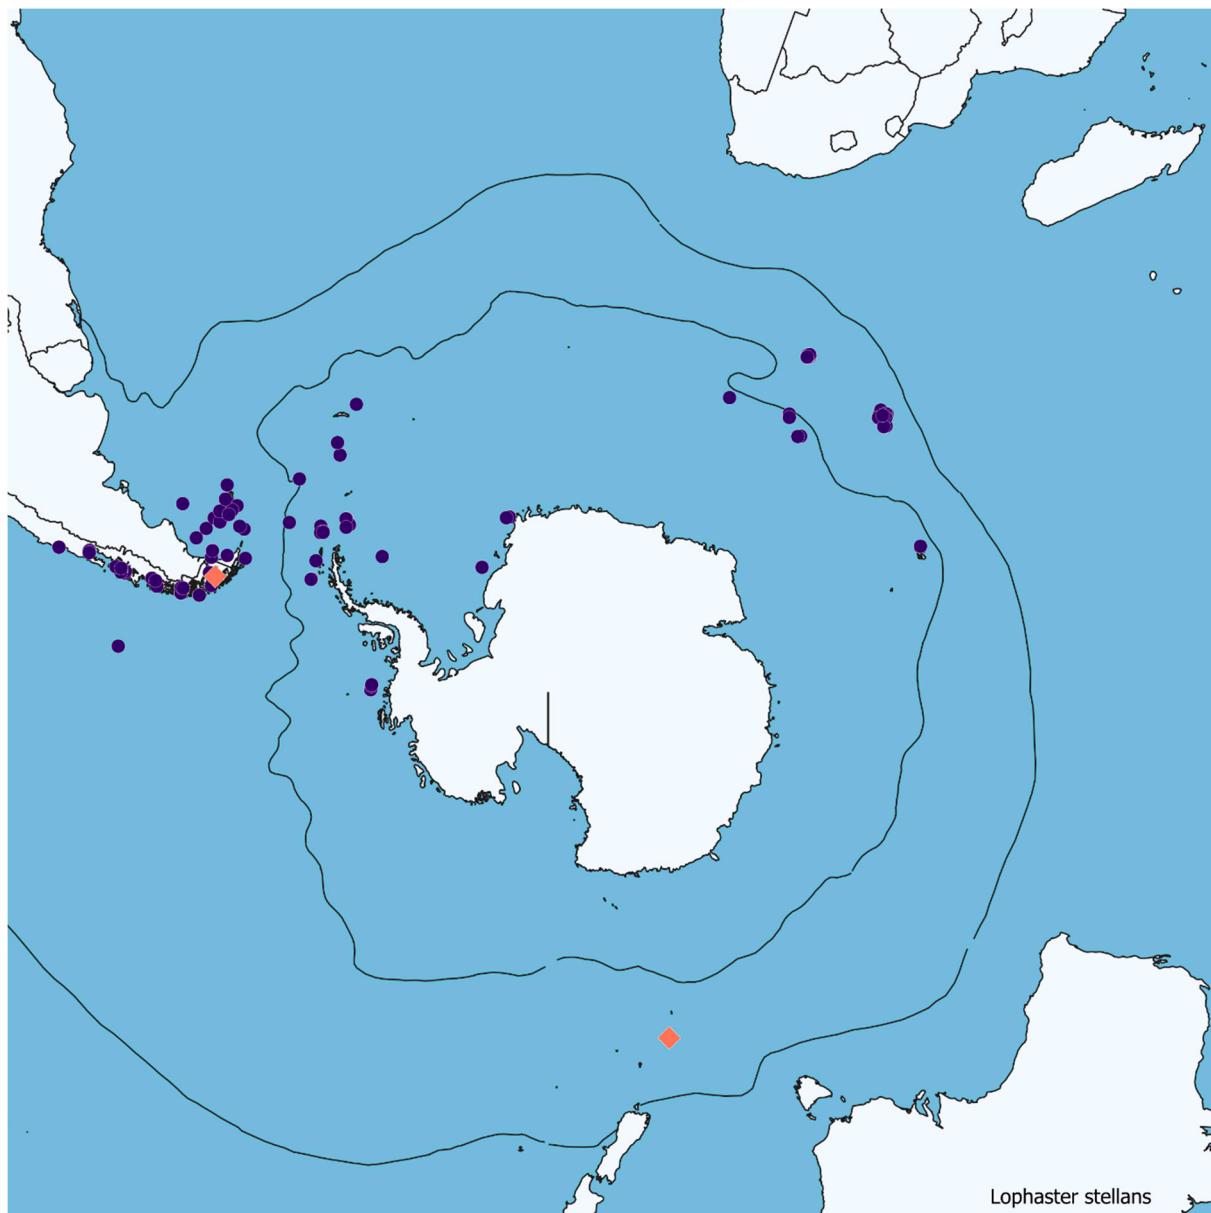

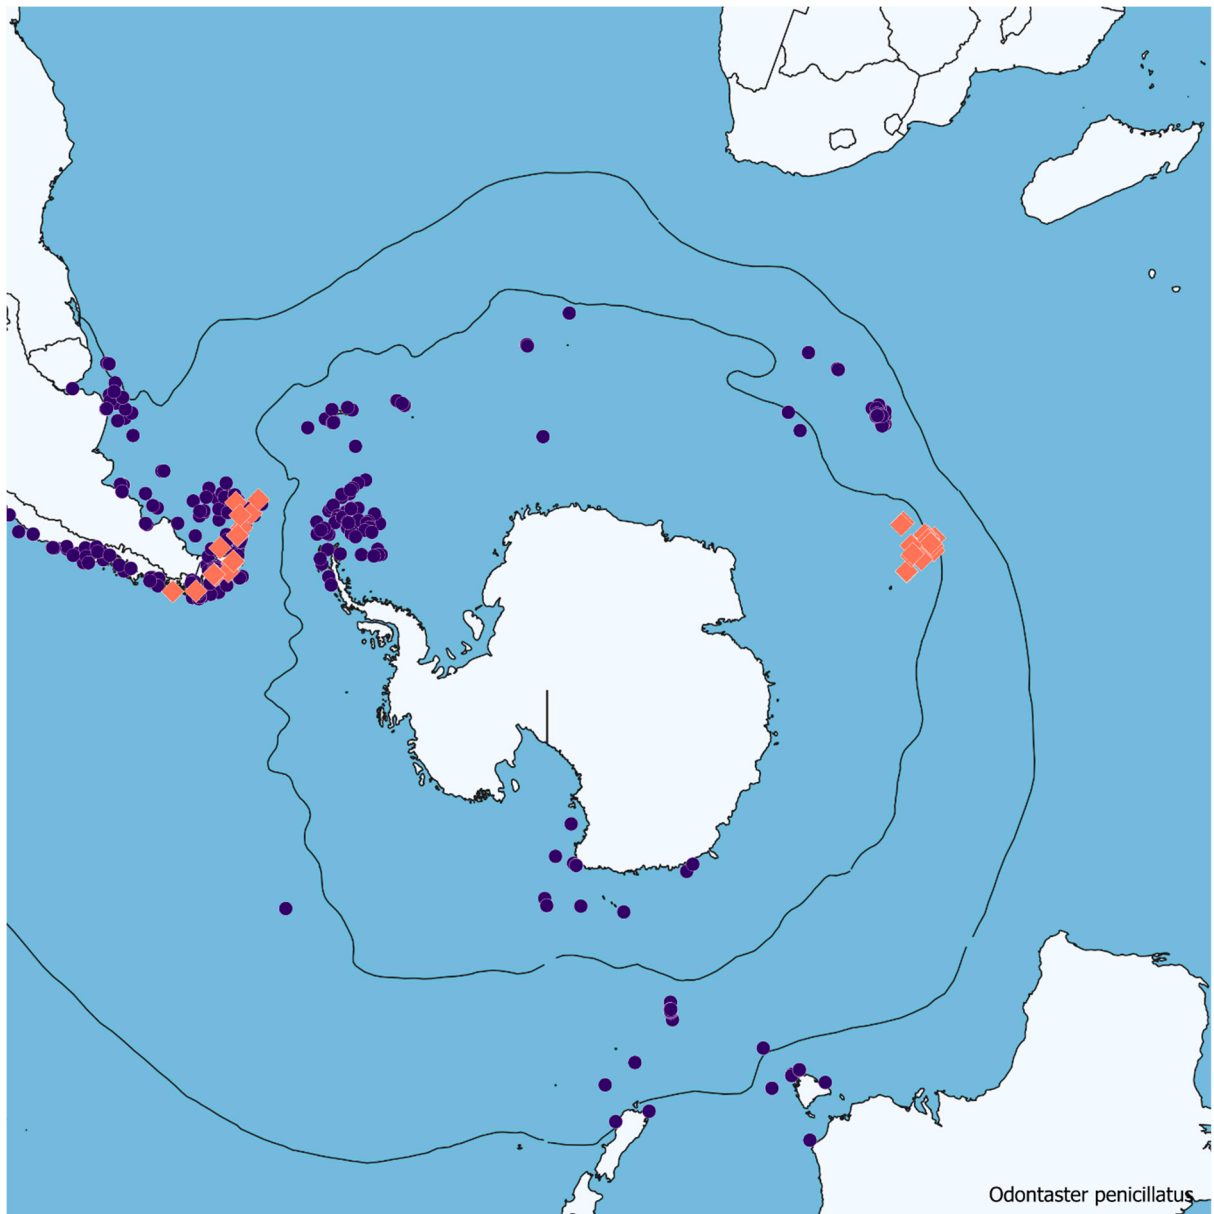

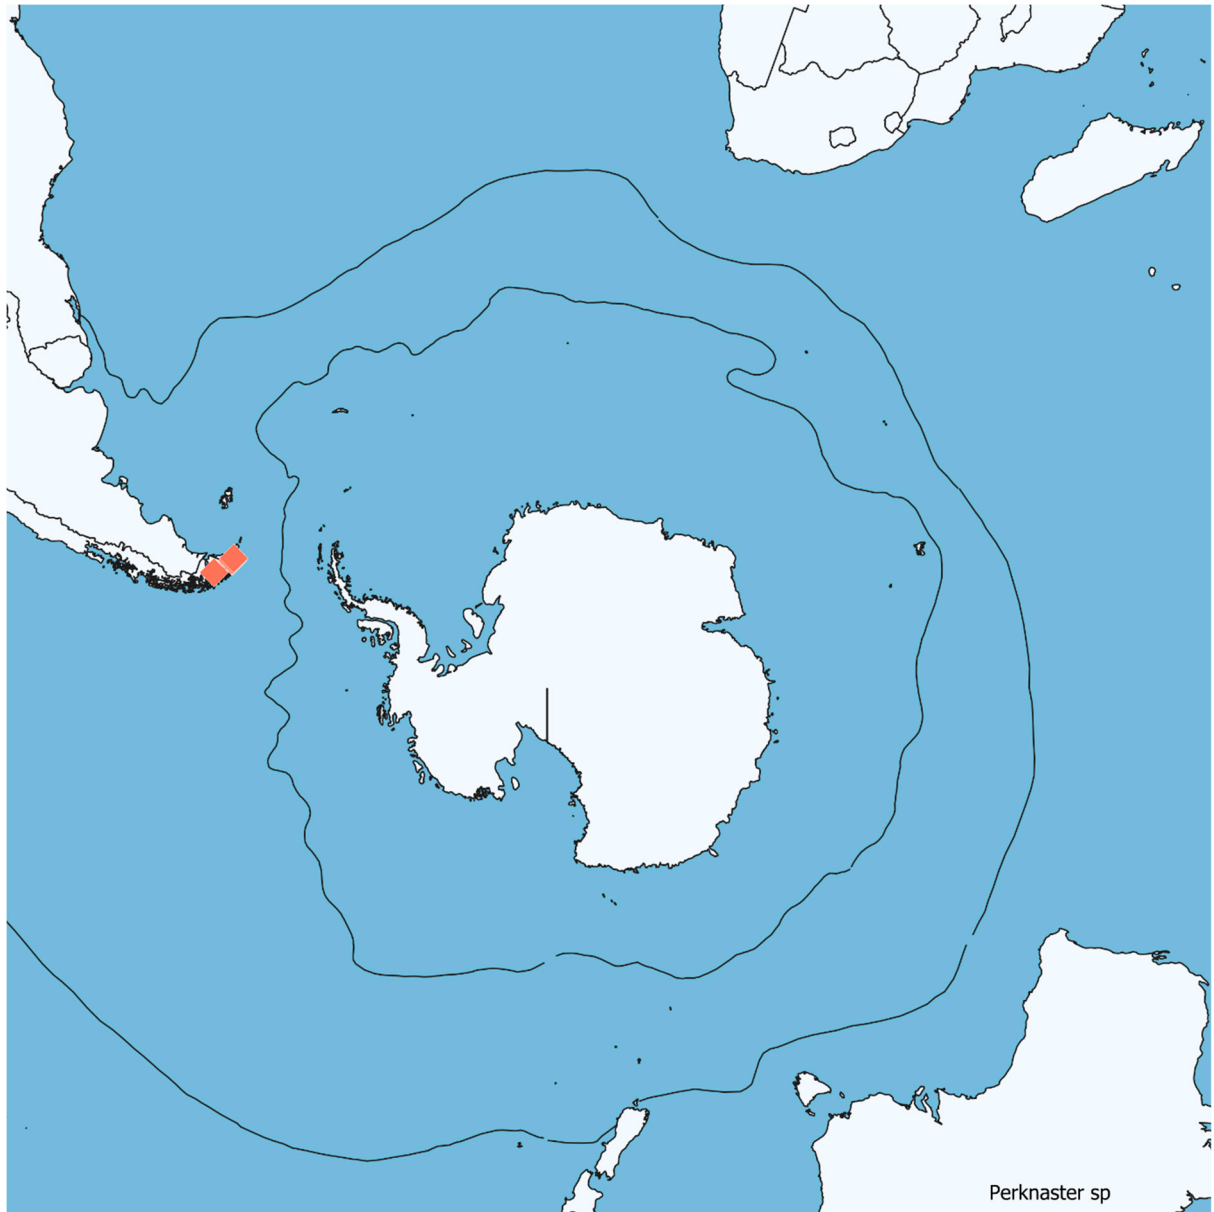

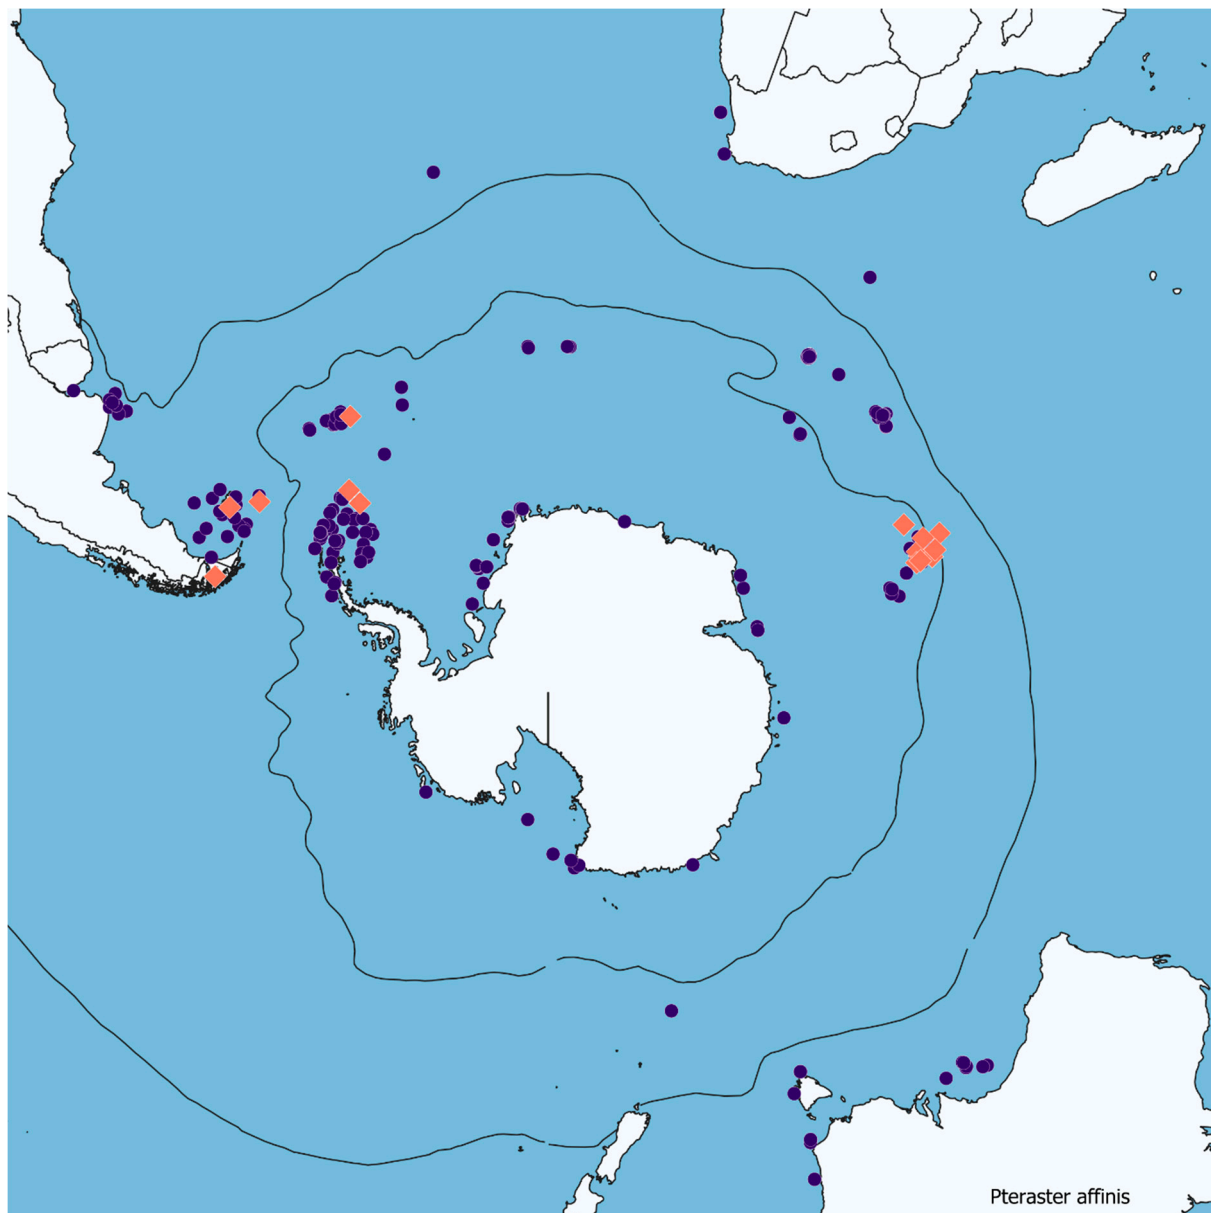

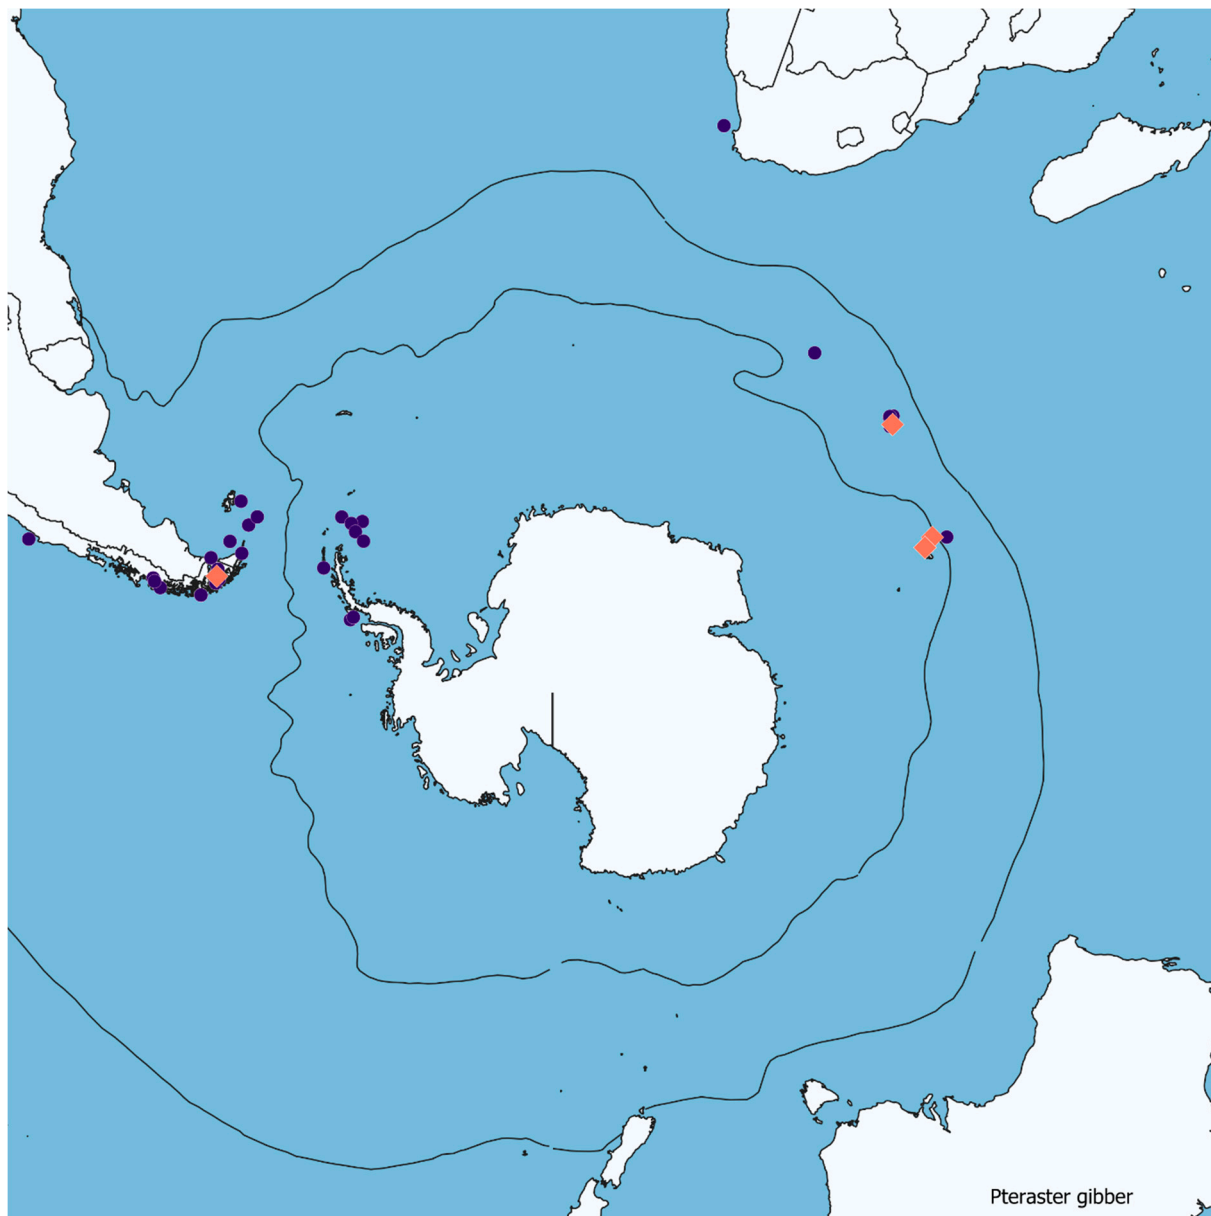

Supplement: s1 [file s1]
