# Supplementary material
Source: MDPI journal article supplement (https://www.mdpi.com/1424-2818/15/11/1129)
Supplement: s1 [file s1]

Archive with 5 entries (5 files):
- FigureS1.pdf
- FigureS2.pdf
- FigureS3.pdf
- TableS1.xlsx
- TableS2.xlsx
