# Supplementary material
Source: MDPI journal article supplement (https://www.mdpi.com/1424-2818/15/11/1129)

**Figure S1: All haplotype networks of species with more than three sequences**

**a) Non-endemic species**

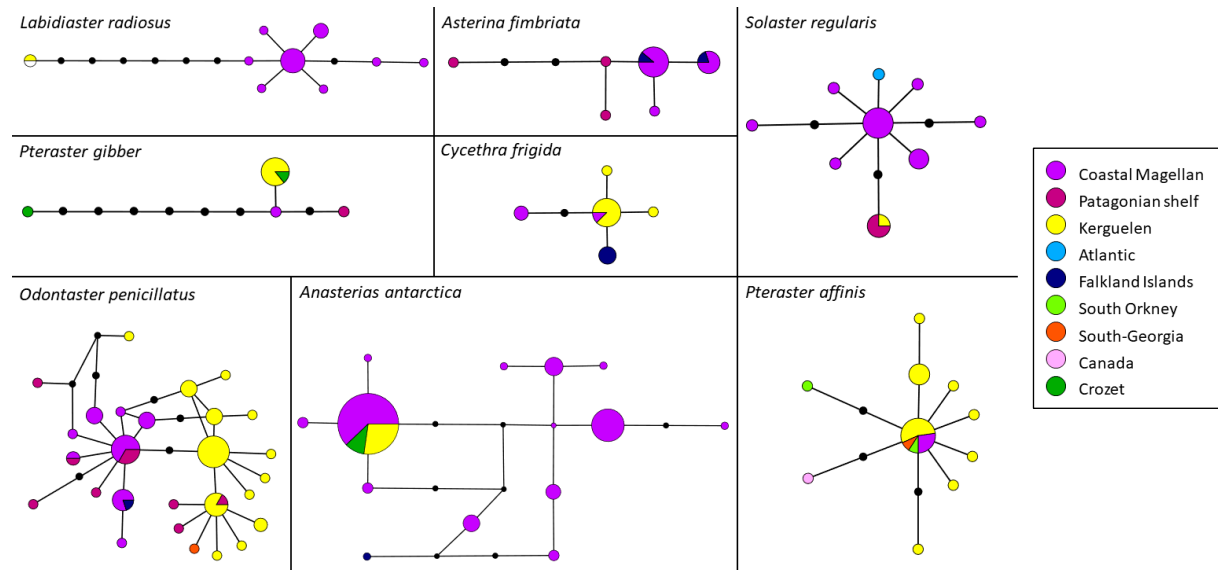

**b) Endemic to the Magellanic region**

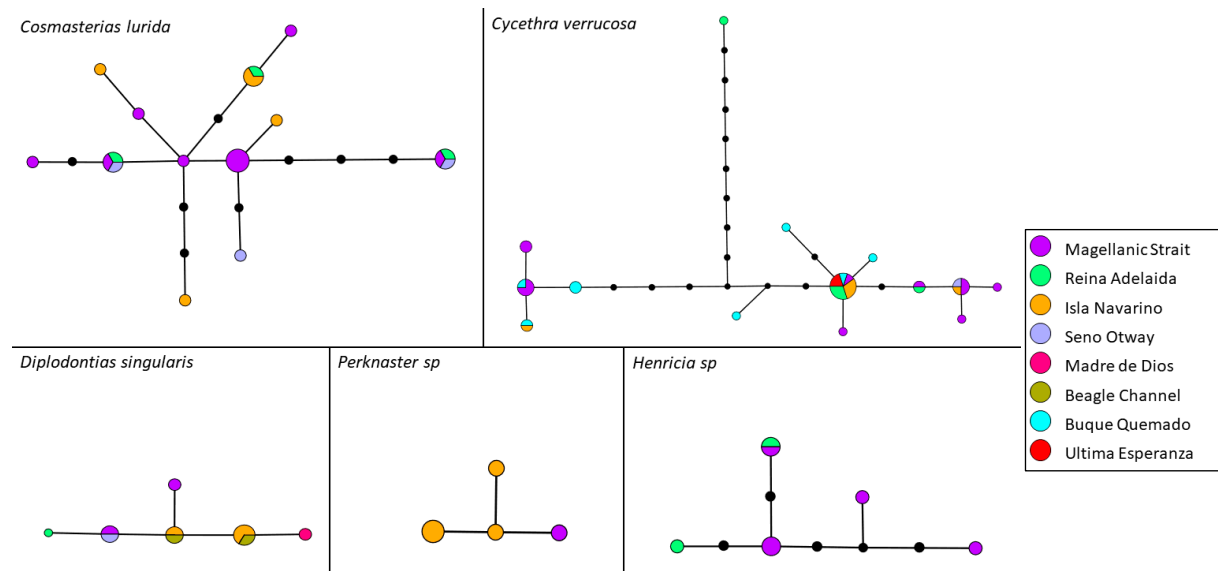

c) *Glabraster antarctica*

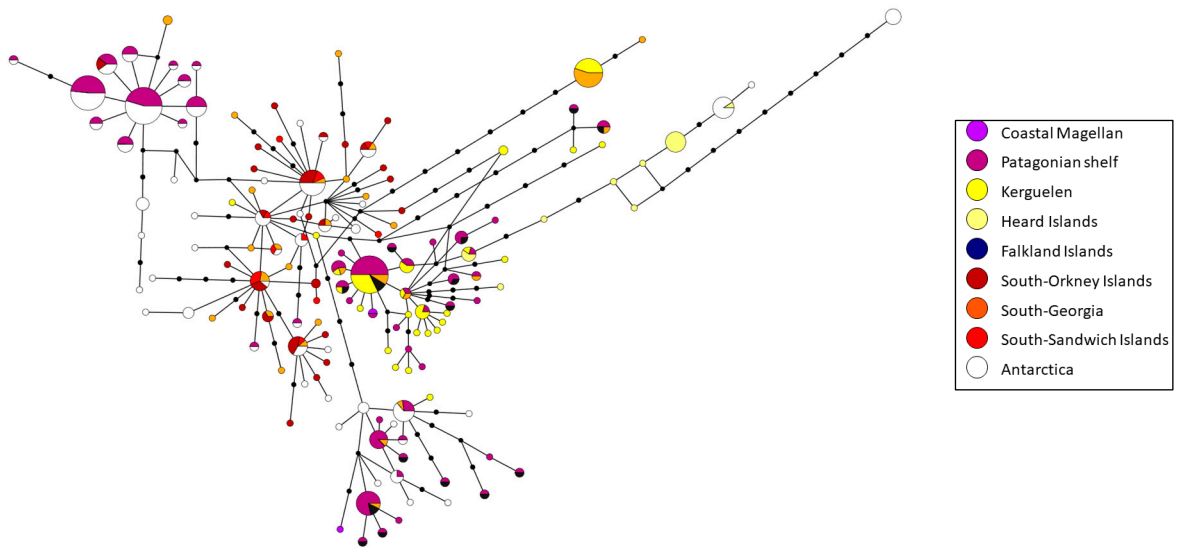

Supplement: s1 [file s1]
