# Supplementary material
Source: MDPI journal article supplement (https://www.mdpi.com/1424-2818/15/11/1129)
Supplement: s1 [file s1 › TableS1.xlsx]

## Sheet: TableA1
Sequence_name	Other names	Vial_nb	Numero_mnhn	MNA_code	N° ULB	BOLD Process ID	BOLD Sample ID	Genbank	CLADE	BOLD BIN	Scientific_name	Region	Location	Station	Lat	Long	Expedition	N° photo	Identified_by	Specimen_location	Fixation
PTK2_26.3		PTK2_26.3			3932	Macrogen	Macrogen		Anasterias_antarctica	BOLD:AAA8344	Anasterias rupicola	Kerguelen	Port aux Francais	Port aux Français (PTK2_RAP)	-49.3537	70.2191	Proteker II	288	Camille Moreau	Brussels (ULB)	Ethanol
JR15005_69.1		69.1			5303				Anasterias_antarctica	BOLD:AAA8344	Undet	Falkland Islands	Falkland Islands	Falklands_Algae	-52.1524	-59.9569	JR15005	867	Camille Moreau	Brussels (ULB)	Ethanol
KERAS014	PTK4_70.1	PTK4_70.1			5340				Anasterias_antarctica	BOLD:AAA8344	Anasterias rupicola	Kerguelen	Port aux Francais	Port aux Français (PTK4_RAP)	-49.354	70.2191	Proteker IV	1515	Camille Moreau	Brussels (ULB)	Ethanol
KERAS015	PTK4_70.2	PTK4_70.2			5341				Anasterias_antarctica	BOLD:AAA8344	Anasterias rupicola	Kerguelen	Port aux Francais	Port aux Français (PTK4_RAP)	-49.354	70.2191	Proteker IV	1516	Camille Moreau	Brussels (ULB)	Ethanol
KERAS016	PTK4_70.3	PTK4_70.3			5342				Anasterias_antarctica	BOLD:AAA8344	Anasterias rupicola	Kerguelen	Port aux Francais	Port aux Français (PTK4_RAP)	-49.354	70.2191	Proteker IV	1517	Camille Moreau	Brussels (ULB)	Ethanol
Chi001		Chi1			5004				Anasterias_antarctica	BOLD:AAA8344	Anasterias antarctica	Magellan	Buque Quemado	Buque Quemado	-52.3315	-69.4851	Uni_Magellan	2043	Camille Moreau	Brussels (ULB)	Ethanol
KERAS032	PTK6_161.1	PTK6_161.1			5998				Anasterias_antarctica	BOLD:AAA8344	Anasterias rupicola	Kerguelen	Port aux Francais	Port aux Français (PTK6_RAP)	-49.3531	70.2175	Proteker VI	IMG_2455, IMG_2456	Camille Moreau	Brussels (ULB)	Ethanol
KERAS033	PTK6_161.2	PTK6_161.2			5999				Anasterias_antarctica	BOLD:AAA8344	Anasterias rupicola	Kerguelen	Port aux Francais	Port aux Français (PTK6_RAP)	-49.3531	70.2175	Proteker VI	IMG_2457, IMG_2458	Camille Moreau	Brussels (ULB)	Ethanol
KERAS044	PTK6_4.14	PTK6_4.14			5914				Anasterias_antarctica	BOLD:AAA8344	Anasterias cf. antarctica	Crozet	Crique du Sphinx (PTK6_RAP)	Crique du Sphinx (PTK6_RAP)	-46.4136	51.8662	Proteker VI	IMG_2490, IMG_2491	Camille Moreau	Brussels (ULB)	Ethanol
PTK6_4.13		PTK6_4.13			5913				Anasterias_antarctica	BOLD:AAA8344	Anasterias cf. antarctica	Kerguelen	Kerguelen	Crique du Sphinx	-49.4374	68.7672	Proteker VI	IMG_2494, IMG_2495	Camille Moreau	Brussels (ULB)	Ethanol
KERAS046	PTK6_4.16	PTK6_4.16			5916				Anasterias_antarctica	BOLD:AAA8344	Anasterias cf. antarctica	Crozet	Crique du Sphinx (PTK6_RAP)	Crique du Sphinx (PTK6_RAP)	-46.4136	51.8662	Proteker VI	IMG_2498, IMG_2499	Camille Moreau	Brussels (ULB)	Ethanol
KERAS045	PTK6_4.15	PTK6_4.15			5915				Anasterias_antarctica	BOLD:AAA8344	Anasterias cf. antarctica	Crozet	Crique du Sphinx (PTK6_RAP)	Crique du Sphinx (PTK6_RAP)	-46.4136	51.8662	Proteker VI	IMG_2502, IMG_2503	Camille Moreau	Brussels (ULB)	Ethanol
KERAS042	PTK6_4.12	PTK6_4.12			5912				Anasterias_antarctica	BOLD:AAA8344	Brood	Crozet	Crique du Sphinx (PTK6_RAP)	Crique du Sphinx (PTK6_RAP)	-46.4136	51.8662	Proteker VI	IMG_2504, IMG_2505	Camille Moreau	Brussels (ULB)	Ethanol
BQ1_As05									Anasterias_antarctica	BOLD:AAA8344		Magellan	Buque quemado		-52.3315	-69.4851
BQ1_As07									Anasterias_antarctica	BOLD:AAA8344		Magellan	Buque quemado		-52.3315	-69.4851
BQ1_As08									Anasterias_antarctica	BOLD:AAA8344		Magellan	Buque quemado		-52.3315	-69.4851
BQ1_As11									Anasterias_antarctica	BOLD:AAA8344		Magellan	Buque quemado		-52.3315	-69.4851
BQ1_As14									Anasterias_antarctica	BOLD:AAA8344		Magellan	Buque quemado		-52.3315	-69.4851
BQ1_As16									Anasterias_antarctica	BOLD:AAA8344		Magellan	Buque quemado		-52.3315	-69.4851
BQ1_As18									Anasterias_antarctica	BOLD:AAA8344		Magellan	Buque quemado		-52.3315	-69.4851
BQ1_As19									Anasterias_antarctica	BOLD:AAA8344		Magellan	Buque quemado		-52.3315	-69.4851
BQ1_As35									Anasterias_antarctica	BOLD:AAA8344		Magellan	Buque quemado		-52.3315	-69.4851
CH1_As01									Anasterias_antarctica	BOLD:AAA8344		Magellan	Canal Copihue		-50.3397	-75.3786
Chi003		Chi3			5006				Anasterias_antarctica	BOLD:AAA8344	Anasterias antarctica	Magellan	Buque Quemado	Buque Quemado	-52.3315	-69.4851	Uni_Magellan		Camille Moreau	Brussels (ULB)	Dry
Chi004		Chi4			5007				Anasterias_antarctica	BOLD:AAA8344	Anasterias antarctica	Magellan	Buque Quemado	Buque Quemado	-52.3315	-69.4851	Uni_Magellan		Camille Moreau	Brussels (ULB)	Dry
Chi005		Chi5			5008				Anasterias_antarctica	BOLD:AAA8344	Anasterias antarctica	Magellan	Buque Quemado	Buque Quemado	-52.3315	-69.4851	Uni_Magellan		Camille Moreau	Brussels (ULB)	Dry
Chi006		Chi6			5009				Anasterias_antarctica	BOLD:AAA8344	Anasterias antarctica	Magellan	Buque Quemado	Buque Quemado	-52.3315	-69.4851	Uni_Magellan		Camille Moreau	Brussels (ULB)	Dry
CroDeep67_		Crozet_Deep_67			11714				Anasterias_antarctica	BOLD:AAA8344	Anasterias sp.	Crozet	Crozet		-46.3823	51.8264	Crozet_Deep		Camille Moreau	Brussels (ULB)	Ethanol
DRD3		DRD3			5030				Anasterias_antarctica	BOLD:AAA8344	Anasterias antarctica	Magellan	Diego Ramirez	Diego Ramirez	-56.5201	-68.7154	Uni_Magellan		Camille Moreau	Punta Arenas (UMag)	Ethanol
DRD4		DRD4			5031				Anasterias_antarctica	BOLD:AAA8344	Anasterias antarctica	Magellan	Diego Ramirez	Diego Ramirez	-56.5201	-68.7154	Uni_Magellan		Camille Moreau	Punta Arenas (UMag)	Ethanol
FB14		FB14			4960				Anasterias_antarctica	BOLD:AAA8344	Anasterias antarctica	Magellan	Fuerte Bulnes	Fuerte Bulnes	-53.6305	-70.9135	Uni_Magellan		Camille Moreau	Brussels (ULB)	Dry
FI1_As01									Anasterias_antarctica	BOLD:AAA8344		Magellan	Faro san Isidro-1		-53.7843	-70.9752
FI1_As02									Anasterias_antarctica	BOLD:AAA8344		Magellan	Faro san Isidro-1		-53.7843	-70.9752
FI1_As03									Anasterias_antarctica	BOLD:AAA8344		Magellan	Faro san Isidro-1		-53.7843	-70.9752
FI1_As04									Anasterias_antarctica	BOLD:AAA8344		Magellan	Faro san Isidro-1		-53.7843	-70.9752
FI1_As05									Anasterias_antarctica	BOLD:AAA8344		Magellan	Faro san Isidro-1		-53.7843	-70.9752
FI1_As06									Anasterias_antarctica	BOLD:AAA8344		Magellan	Faro san Isidro-1		-53.7843	-70.9752
FI1_As07									Anasterias_antarctica	BOLD:AAA8344		Magellan	Faro san Isidro-1		-53.7843	-70.9752
FI1_As08									Anasterias_antarctica	BOLD:AAA8344		Magellan	Faro san Isidro-1		-53.7843	-70.9752
FI1_As09									Anasterias_antarctica	BOLD:AAA8344		Magellan	Faro san Isidro-1		-53.7843	-70.9752
FI1_As22									Anasterias_antarctica	BOLD:AAA8344		Magellan	Faro san Isidro-1		-53.7843	-70.9752
FI1_As23									Anasterias_antarctica	BOLD:AAA8344		Magellan	Faro san Isidro-1		-53.7843	-70.9752
FI1_As24									Anasterias_antarctica	BOLD:AAA8344		Magellan	Faro san Isidro-1		-53.7843	-70.9752
FI1_As26									Anasterias_antarctica	BOLD:AAA8344		Magellan	Faro san Isidro-1		-53.7843	-70.9752
FI1_As27									Anasterias_antarctica	BOLD:AAA8344		Magellan	Faro san Isidro-1		-53.7843	-70.9752
FI1_As28									Anasterias_antarctica	BOLD:AAA8344		Magellan	Faro san Isidro-1		-53.7843	-70.9752
FI1_As29									Anasterias_antarctica	BOLD:AAA8344		Magellan	Faro san Isidro-1		-53.7843	-70.9752
FI1_As31									Anasterias_antarctica	BOLD:AAA8344		Magellan	Faro san Isidro-1		-53.7843	-70.9752
FI1_As33									Anasterias_antarctica	BOLD:AAA8344		Magellan	Faro san Isidro-1		-53.7843	-70.9752
FI1_As35									Anasterias_antarctica	BOLD:AAA8344		Magellan	Faro san Isidro-1		-53.7843	-70.9752
FI1_As36									Anasterias_antarctica	BOLD:AAA8344		Magellan	Faro san Isidro-1		-53.7843	-70.9752
FI1_As49									Anasterias_antarctica	BOLD:AAA8344		Magellan	Faro san Isidro-2		-53.7883	-70.9721
FI1_As50									Anasterias_antarctica	BOLD:AAA8344		Magellan	Faro san Isidro-2		-53.7883	-70.9721
FI1_As51									Anasterias_antarctica	BOLD:AAA8344		Magellan	Faro san Isidro-2		-53.7883	-70.9721
FI1_As52									Anasterias_antarctica	BOLD:AAA8344		Magellan	Faro san Isidro-2		-53.7883	-70.9721
FI1_As53									Anasterias_antarctica	BOLD:AAA8344		Magellan	Faro san Isidro-2		-53.7883	-70.9721
FI1_As55									Anasterias_antarctica	BOLD:AAA8344		Magellan	Faro san Isidro-2		-53.7883	-70.9721
FI1_As56									Anasterias_antarctica	BOLD:AAA8344		Magellan	Faro san Isidro-2		-53.7883	-70.9721
FI1_As57									Anasterias_antarctica	BOLD:AAA8344		Magellan	Faro san Isidro-2		-53.7883	-70.9721
FI1_As59									Anasterias_antarctica	BOLD:AAA8344		Magellan	Faro san Isidro-2		-53.7883	-70.9721
FI1_As61									Anasterias_antarctica	BOLD:AAA8344		Magellan	Faro san Isidro-2		-53.7883	-70.9721
FI1_As63									Anasterias_antarctica	BOLD:AAA8344		Magellan	Faro san Isidro-2		-53.7883	-70.9721
FI1_As64									Anasterias_antarctica	BOLD:AAA8344		Magellan	Faro san Isidro-2		-53.7883	-70.9721
FI1_As65									Anasterias_antarctica	BOLD:AAA8344		Magellan	Faro san Isidro-2		-53.7883	-70.9721
I1_As08									Anasterias_antarctica	BOLD:AAA8344		Magellan	Faro san Isidro-3		-53.7852	-70.9746
KERAS005-20	Crozet_Deep_32.3	Crozet_Deep_32.3			11711				Anasterias_antarctica	BOLD:AAA8344	Undet	Crozet	Crozet		-46.3823	51.8264	Crozet_Deep		Camille Moreau	Brussels (ULB)	Ethanol
KERAS068	PTK8_2.8	PTK8_2.8			11784				Anasterias_antarctica	BOLD:AAA8344	Anasterias sp	Crozet	Crique du Sphinx	Crique du Sphinx	-46.4131	51.8682	Proteker VIII		Camille Moreau	Brussels (ULB)	Ethanol
MAGI050	As262.1e				11468	MAGI050-09			Anasterias_antarctica	BOLD:AAA8344	Forcipulatida	Patagonian shelf	Magellan shelf	As262.1e	-54.817	-60.267	MAGI		Alexis M. Janosik	Auburn University, Rouse Life Science Building
PH12		PH12			5071				Anasterias_antarctica	BOLD:AAA8344	Anasterias antarctica	Magellan	Puerto del Hambre	Puerto del Hambre	-53.6085	-70.9322	Uni_Magellan		Camille Moreau	Brussels (ULB)	Dry
PH13		PH13			5072				Anasterias_antarctica	BOLD:AAA8344	Anasterias antarctica	Magellan	Puerto del Hambre	Puerto del Hambre	-53.6085	-70.9322	Uni_Magellan		Camille Moreau	Brussels (ULB)	Dry
PH19		PH19			5081				Anasterias_antarctica	BOLD:AAA8344	Anasterias antarctica	Magellan	Puerto del Hambre	Puerto del Hambre	-53.6085	-70.9322	Uni_Magellan		Camille Moreau	Brussels (ULB)	Dry
PH20		PH20			5073				Anasterias_antarctica	BOLD:AAA8344	Anasterias antarctica	Magellan	Puerto del Hambre	Puerto del Hambre	-53.6085	-70.9322	Uni_Magellan		Camille Moreau	Brussels (ULB)	Dry
PH21		PH21			5074				Anasterias_antarctica	BOLD:AAA8344	Anasterias antarctica	Magellan	Puerto del Hambre	Puerto del Hambre	-53.6085	-70.9322	Uni_Magellan		Camille Moreau	Brussels (ULB)	Dry
PH8 ERREUR!!! C. verrucosa		PH8			5097				Anasterias_antarctica	BOLD:AAA8344	Cycethra verrucosa	Magellan	Puerto del Hambre	Puerto del Hambre	-53.6085	-70.9322	Uni_Magellan		Camille Moreau	Brussels (ULB)	Dry
PM_04									Anasterias_antarctica	BOLD:AAA8344		Magellan	Pia Morrena		-54.8431	-69.6751
PM_05									Anasterias_antarctica	BOLD:AAA8344		Magellan	Pia Morrena		-54.8431	-69.6751
PTK4_70_09_3									Anasterias_antarctica	BOLD:AAA8344		Kerguelen	Port aux Francais (PTK4_RAP)		-49.354	70.2191
PTK4_70-05_COI									Anasterias_antarctica	BOLD:AAA8344		Kerguelen	Port aux Francais (PTK4_RAP)		-49.354	70.2191
PTK4_70-08_COI									Anasterias_antarctica	BOLD:AAA8344		Kerguelen	Port aux Francais (PTK4_RAP)		-49.354	70.2191
PTK4_70-11									Anasterias_antarctica	BOLD:AAA8344		Kerguelen	Port aux Francais (PTK4_RAP)		-49.354	70.2191
PTK4_70-12_COI									Anasterias_antarctica	BOLD:AAA8344		Kerguelen	Port aux Francais (PTK4_RAP)		-49.354	70.2191
PTK4_70-15_COI									Anasterias_antarctica	BOLD:AAA8344		Kerguelen	Port aux Francais (PTK4_RAP)		-49.354	70.2191
PTK4_70-16_COI									Anasterias_antarctica	BOLD:AAA8344		Kerguelen	Port aux Francais (PTK4_RAP)		-49.354	70.2191
PTK4_70-18_COI									Anasterias_antarctica	BOLD:AAA8344		Kerguelen	Port aux Francais (PTK4_RAP)		-49.354	70.2191
PTK4_70-26_COI									Anasterias_antarctica	BOLD:AAA8344		Kerguelen	Port aux Francais (PTK4_RAP)		-49.354	70.2191
PTK4_70-31_COI									Anasterias_antarctica	BOLD:AAA8344		Kerguelen	Port aux Francais (PTK4_RAP)		-49.354	70.2191
PTK8_2.11		PTK8_2.11			11787				Anasterias_antarctica	BOLD:AAA8344	Anasterias sp	Kerguelen	Kerguelen	Crique du Sphinx	-49.4374	68.7672	Proteker VIII		Camille Moreau	Brussels (ULB)	Ethanol
R1_As04									Anasterias_antarctica	BOLD:AAA8344		Magellan	Diego Ramirez		-56.5201	-68.7154
RB1_As05									Anasterias_antarctica	BOLD:AAA8344		Magellan	Rinconada Bulnes		-53.5964	-70.9355
RB1_As06									Anasterias_antarctica	BOLD:AAA8344		Magellan	Rinconada Bulnes		-53.5964	-70.9355
RB1_As07									Anasterias_antarctica	BOLD:AAA8344		Magellan	Rinconada Bulnes		-53.5964	-70.9355
RB1_As08									Anasterias_antarctica	BOLD:AAA8344		Magellan	Rinconada Bulnes		-53.5964	-70.9355
RB1_As09									Anasterias_antarctica	BOLD:AAA8344		Magellan	Rinconada Bulnes		-53.5964	-70.9355
RB1_As12									Anasterias_antarctica	BOLD:AAA8344		Magellan	Rinconada Bulnes		-53.5964	-70.9355
RB2_As01									Anasterias_antarctica	BOLD:AAA8344		Magellan	Rinconada Bulnes		-53.5964	-70.9355
RB2_As04									Anasterias_antarctica	BOLD:AAA8344		Magellan	Rinconada Bulnes		-53.5964	-70.9355
RB3_As02									Anasterias_antarctica	BOLD:AAA8344		Magellan	Punta Carreras		-53.5864	-70.924
RB3_As12									Anasterias_antarctica	BOLD:AAA8344		Magellan	Punta Carreras		-53.5864	-70.924
SO1_As08									Anasterias_antarctica	BOLD:AAA8344		Magellan	Seno Otway-1		-53.1434	-71.4209
SP1_As01									Anasterias_antarctica	BOLD:AAA8344		Magellan	South Punta Arenas		-53.3389	-70.9517
SP1_As02									Anasterias_antarctica	BOLD:AAA8344		Magellan	South Punta Arenas		-53.3389	-70.9517
BA_As07									Anasterias_antarctica			Magellan			-54.903	-68.1264
PM_As01									Anasterias_antarctica			Magellan			-54.9334	-67.5038
PM_As02									Anasterias_antarctica			Magellan			-54.9334	-67.5038
PN_As01									Anasterias_antarctica			Magellan			-54.9238	-68.3147
PN_As02									Anasterias_antarctica			Magellan			-54.9238	-68.3147
PN_As03									Anasterias_antarctica			Magellan			-54.9238	-68.3147
PW_As03									Anasterias_antarctica			Magellan			-54.9293	-67.5726
RB23_As09									Anasterias_antarctica			Magellan			-53.5964	-70.9355
RB23_As10									Anasterias_antarctica			Magellan			-53.5964	-70.9355
ROB_As01									Anasterias_antarctica			Magellan			-54.9406	-67.6675
ROB_As02_M13-FP									Anasterias_antarctica			Magellan			-54.9406	-67.6675
SORK164	JR15005_69-3, SORK164-17	69.3			4681	SORK164-17	JR15005_69-3		Asterina fimbriata	BOLD:ACI1273	Asterina sp	Falkland Islands	Falklands_Algae	Falklands_Algae	-52.1524	-59.9569	JR15005	87	Camille Moreau	Brussels (ULB)	Ethanol
JR15005_69.6_1C76SAA000_A2		69.6			5305				Asterina fimbriata	BOLD:ACI1273	Undet	Falkland Islands	Falkland Islands	Falklands_Algae	-52.1524	-59.9569	JR15005	871	Camille Moreau	Brussels (ULB)	Ethanol
BQ1_As13									Asterina fimbriata	BOLD:ACI1273		Magellan	Buque quemado		-52.3315	-69.4851
BQ1_As31									Asterina fimbriata	BOLD:ACI1273		Magellan	Buque quemado		-52.3315	-69.4851
BQ1_As32									Asterina fimbriata	BOLD:ACI1273		Magellan	Buque quemado		-52.3315	-69.4851
BQ1_As33									Asterina fimbriata	BOLD:ACI1273		Magellan	Buque quemado		-52.3315	-69.4851
GA13_As01									Asterina fimbriata	BOLD:ACI1273		Magellan	Between Isla Garcia and Escribano		-50.4192	-75.0128
GBEHA399-13_Odontaster	As77				10089	GBEHA399-13		GQ294377	Asterina fimbriata	BOLD:ACI1273	Odontaster meridionalis	Patagonian shelf	Magellanic shelf	LMG 04-07	-54.27	-63.52	Genbank			Mined from GenBank, NCBI
GBEHA434-13_Odontaster	As4				10124	GBEHA434-13		GQ294342	Asterina fimbriata	BOLD:ACI1273	Odontaster meridionalis	Patagonian shelf	Magellanic shelf	LMG 04-07	-54.27	-63.52	Genbank			Mined from GenBank, NCBI
GBEHA435-13_Odontaster	As3				10125	GBEHA435-13		GQ294341	Asterina fimbriata	BOLD:ACI1273	Odontaster meridionalis	Patagonian shelf	Magellanic shelf	LMG 04-07	-54.27	-63.52	Genbank			Mined from GenBank, NCBI
PH_15_									Asterina fimbriata	BOLD:ACI1273		Magellan	Puerto del Hambre	Puerto del Hambre	-53.6085	-70.9322
RB3_As15									Asterina fimbriata	BOLD:ACI1273		Magellan	Punta Carreras		-53.5864	-70.924
PD_As01									Asterina fimbriata			Magellan			-54.9263	-67.3449
RB23_As01									Asterina fimbriata			Magellan			-53.5964	-70.9355
RB23_As05									Asterina fimbriata			Magellan			-53.5964	-70.9355
RB23_As06									Asterina fimbriata			Magellan			-53.5964	-70.9355
RB23_As07									Asterina fimbriata			Magellan			-53.5964	-70.9355
RB23_As08									Asterina fimbriata			Magellan			-53.5964	-70.9355
A11_As03									Cosmasterias lurida	Private		Magellan	Isla Alta		-52.4433	-74.2916
A11_As18									Cosmasterias lurida	Private		Magellan	Isla Alta		-52.4433	-74.2916
FI1_As10									Cosmasterias lurida	Private		Magellan	Faro san Isidro-1		-53.7843	-70.9752
FI1_As11									Cosmasterias lurida	Private		Magellan	Faro san Isidro-1		-53.7843	-70.9752
FI1_As12									Cosmasterias lurida	Private		Magellan	Faro san Isidro-1		-53.7843	-70.9752
FI1_As13									Cosmasterias lurida	Private		Magellan	Faro san Isidro-1		-53.7843	-70.9752
FI1_As15									Cosmasterias lurida	Private		Magellan	Faro san Isidro-1		-53.7843	-70.9752
FI1_As18									Cosmasterias lurida	Private		Magellan	Faro san Isidro-1		-53.7843	-70.9752
FI1_As19									Cosmasterias lurida	Private		Magellan	Faro san Isidro-1		-53.7843	-70.9752
PR7_As03									Cosmasterias lurida	Private		Magellan	Isla Parker		-52.6745	-74.1024
RB1_As02									Cosmasterias lurida	Private		Magellan	Rinconada Bulnes		-53.5964	-70.9355
RB1_As04									Cosmasterias lurida	Private		Magellan	Rinconada Bulnes		-53.5964	-70.9355
RB3_As01									Cosmasterias lurida	Private		Magellan	Punta Carreras		-53.5864	-70.924
SO1_As15									Cosmasterias lurida	Private		Magellan	Seno Otway-1		-53.1434	-71.4209
SO1_As16									Cosmasterias lurida	Private		Magellan	Seno Otway-1		-53.1434	-71.4209
SO1_As18									Cosmasterias lurida	Private		Magellan	Seno Otway-1		-53.1434	-71.4209
BA_As04									Cosmasterias lurida			Magellan			-54.903	-68.1264
BA_As05									Cosmasterias lurida			Magellan			-54.903	-68.1264
BA_As06									Cosmasterias lurida			Magellan			-54.903	-68.1264
PW_As01									Cosmasterias lurida			Magellan			-54.9293	-67.5726
PW_As02									Cosmasterias lurida			Magellan			-54.9293	-67.5726
SORK166	JR15005_69-4, SORK166-17	69.4			4682	SORK166-17	JR15005_69-4		Cycethra frigida	BOLD:ADG2622	Undet	Falkland Islands	Falklands_Algae	Falklands_Algae	-52.1524	-59.9569	JR15005	88	Camille Moreau	Brussels (ULB)	Ethanol
PTK1_9		PTK1_9			3892				Cycethra frigida	BOLD:ADG2622	Cycethra frigida	Kerguelen	Iles du Princes de Monaco	Iles du Princes de Monaco (PTK1_PL02)	-49.6	69.2397	Proteker I	257	Camille Moreau	Brussels (ULB)	Ethanol
PTK2_26.2		PTK2_26.2			3931	Macrogen	Macrogen		Cycethra frigida	BOLD:ADG2622	Cycethra frigida	Kerguelen	Port aux Francais	Port aux Français (PTK2_RAP)	-49.3537	70.2191	Proteker II	287	Camille Moreau	Brussels (ULB)	Ethanol
JR15005_69.7_		69.7			5306				Cycethra frigida	BOLD:ADG2622	Undet	Falkland Islands	Falkland Islands	Falklands_Algae	-52.1524	-59.9569	JR15005	866	Camille Moreau	Brussels (ULB)	Ethanol
JR15005_69.8_		69.8			5307				Cycethra frigida	BOLD:ADG2622	Undet	Falkland Islands	Falkland Islands	Falklands_Algae	-52.1524	-59.9569	JR15005	869	Camille Moreau	Brussels (ULB)	Ethanol
KERAS056	PTK6_66	PTK6_66			5953				Cycethra frigida	BOLD:ADG2622	Cycethra frigida	Kerguelen	Ile Longue	Ile Longue (PTK6_PL)	-49.5385	69.8842	Proteker VI	IMG_2346, IMG_2347	Camille Moreau	Brussels (ULB)	Ethanol
KERAS053	PTK6_56.1	PTK6_56.1			5931				Cycethra frigida	BOLD:ADG2622	Cycethra frigida	Kerguelen	Ile Longue	Ile Longue (PTK6_PL)	-49.5385	69.8842	Proteker VI	IMG_2403, IMG_2404	Camille Moreau	Brussels (ULB)	Ethanol
KERAS037	PTK6_36.6	PTK6_36.6			5930				Cycethra frigida	BOLD:ADG2622	Cycethra frigida	Kerguelen	Port aux Francais	Port aux Français (PTK6_PL)	-49.3537	70.2191	Proteker VI	IMG_2427, IMG_2428	Camille Moreau	Brussels (ULB)	Ethanol
KERAS036	PTK6_36.5	PTK6_36.5			5929				Cycethra frigida	BOLD:ADG2622	Cycethra frigida	Kerguelen	Port aux Francais	Port aux Français (PTK6_PL)	-49.3537	70.2191	Proteker VI	IMG_2429, IMG_2430,IMG_2431, IMG_2432	Camille Moreau	Brussels (ULB)	Ethanol
KERAS038	PTK6_36.4	PTK6_36.4			5928				Cycethra frigida	BOLD:ADG2622	Cycethra frigida	Kerguelen	Port aux Francais	Port aux Français (PTK6_PL)	-49.3537	70.2191	Proteker VI	IMG_2433, IMG_2434	Camille Moreau	Brussels (ULB)	Ethanol
BQ1_As09									Cycethra frigida	BOLD:ADG2622		Magellan	Buque Quemado		-52.3315	-69.4851
BQ1_As34									Cycethra frigida	BOLD:ADG2622		Magellan	Buque quemado		-52.3315	-69.4851
KERAS093	PTK8_32.1bis	PTK8_32.1bis			11908				Cycethra frigida	BOLD:ADG2622	Cycethra frigida	Kerguelen	Port Couvreux	Port Couvreux	-49.1698	69.4382	Proteker VIII		Camille Moreau	Brussels (ULB)	Ethanol
KERAS094	PTK8_32.2bis	PTK8_32.2bis			11909				Cycethra frigida	BOLD:ADG2622	Cycethra frigida	Kerguelen	Port Couvreux	Port Couvreux	-49.1698	69.4382	Proteker VIII		Camille Moreau	Brussels (ULB)	Ethanol
RB1_As10									Cycethra frigida	BOLD:ADG2622		Magellan	Rinconada Bulnes		-53.5964	-70.9355
PH7		PH7			5084				Cycethra verrucosa	BOLD:AAR5363 (98%)	Diplodontias singularis	Magellan	Puerto del Hambre	Puerto del Hambre	-53.6085	-70.9322	Uni_Magellan	2045	Camille Moreau	Brussels (ULB)	Ethanol
A11_As11									Cycethra verrucosa	BOLD:AAR5363 (98%)		Magellan	Isla Alta		-52.4433	-74.2916
A11_As13									Cycethra verrucosa	BOLD:AAR5363 (98%)		Magellan	Isla Alta		-52.4433	-74.2916
BQ1_As02									Cycethra verrucosa	BOLD:AAR5363 (98%)		Magellan	Buque Quemado		-52.3315	-69.4851
BQ1_As03									Cycethra verrucosa	BOLD:AAR5363 (98%)		Magellan	Buque Quemado		-52.3315	-69.4851
BQ1_As15									Cycethra verrucosa	BOLD:AAR5363 (98%)		Magellan	Buque Quemado		-52.3315	-69.4851
BQ1_As22									Cycethra verrucosa	BOLD:AAR5363 (98%)		Magellan	Buque quemado		-52.3315	-69.4851
BQ1_As23									Cycethra verrucosa	BOLD:AAR5363 (98%)		Magellan	Buque quemado		-52.3315	-69.4851
BQ1_As24									Cycethra verrucosa	BOLD:AAR5363 (98%)		Magellan	Buque quemado		-52.3315	-69.4851
BQ1_As25									Cycethra verrucosa	BOLD:AAR5363 (98%)		Magellan	Buque quemado		-52.3315	-69.4851
BQ1_As30									Cycethra verrucosa	BOLD:AAR5363 (98%)		Magellan	Buque quemado		-52.3315	-69.4851
FI1_As37									Cycethra verrucosa	BOLD:AAR5363 (98%)		Magellan	Faro san Isidro-2		-53.7883	-70.9721
FI1_As41									Cycethra verrucosa	BOLD:AAR5363 (98%)		Magellan	Faro san Isidro-2		-53.7883	-70.9721
FI1_As43									Cycethra verrucosa	BOLD:AAR5363 (98%)		Magellan	Faro san Isidro-2		-53.7883	-70.9721
FI1_As44									Cycethra verrucosa	BOLD:AAR5363 (98%)		Magellan	Faro san Isidro-2		-53.7883	-70.9721
FI1_As48									Cycethra verrucosa	BOLD:AAR5363 (98%)		Magellan	Faro san Isidro-2		-53.7883	-70.9721
FI1_As54									Cycethra verrucosa	BOLD:AAR5363 (98%)		Magellan	Faro san Isidro-2		-53.7883	-70.9721
FI1_As60									Cycethra verrucosa	BOLD:AAR5363 (98%)		Magellan	Faro san Isidro-2		-53.7883	-70.9721
MO25_As03									Cycethra verrucosa	BOLD:AAR5363 (98%)		Magellan	Montanas		-51.8542	-73.3166
MO25_As04									Cycethra verrucosa	BOLD:AAR5363 (98%)		Magellan	Montanas		-51.8542	-73.3166
PH11		PH11			5096				Cycethra verrucosa	BOLD:AAR5363 (98%)	Cycethra verrucosa	Magellan	Puerto del Hambre	Puerto del Hambre	-53.6085	-70.9322	Uni_Magellan		Camille Moreau	Brussels (ULB)	Dry
PH3		PH3			5091				Cycethra verrucosa	BOLD:AAR5363 (98%)	Patiriella fimbriata	Magellan	Puerto del Hambre	Puerto del Hambre	-53.6085	-70.9322	Uni_Magellan		Camille Moreau	Brussels (ULB)	Dry
PR7_As17									Cycethra verrucosa	BOLD:AAR5363 (98%)		Magellan	Isla Parker		-52.6745	-74.1024
RB3_As16									Cycethra verrucosa	BOLD:AAR5363 (98%)		Magellan	Punta Carreras		-53.5864	-70.924
RB3_As17									Cycethra verrucosa	BOLD:AAR5363 (98%)		Magellan	Punta Carreras		-53.5864	-70.924
YB4_As01									Cycethra verrucosa			Magellan	Isla Yerbas Buenas		-52.5075	-73.9669
YB4_As02									Cycethra verrucosa			Magellan	Isla Yerbas Buenas		-52.5075	-73.9669
IPM_As01									Cycethra verrucosa			Magellan			-54.932	-67.4986
IPM_As02									Cycethra verrucosa			Magellan			-54.932	-67.4986
PB_As01									Cycethra verrucosa			Magellan			-54.912	-67.8079
PN_As05									Cycethra verrucosa			Magellan			-54.9238	-68.3147
PW_As06									Cycethra verrucosa			Magellan			-54.9293	-67.5726
SO23_As01									Cycethra verrucosa			Magellan			-53.1434	-71.4209
A11_As02									Diplondontias_singularis			Magellan	Isla Alta		-52.4433	-74.2916
CH1_As03									Diplondontias_singularis	BOLD:AEH4090		Magellan	Canal Copihue		-50.3397	-75.3786
FI1_As58									Diplondontias_singularis	BOLD:AEH4090		Magellan	Faro san Isidro-2		-53.7883	-70.9721
PM_01									Diplondontias_singularis	BOLD:AEH4090		Magellan	Pia Morrena		-54.8431	-69.6751
PM_02									Diplondontias_singularis	BOLD:AEH4090		Magellan	Pia Morrena		-54.8431	-69.6751
RB3_As09									Diplondontias_singularis	BOLD:AEH4090		Magellan	Punta Carreras		-53.5864	-70.924
SO1_As11									Diplondontias_singularis	BOLD:AEH4090		Magellan	Seno Otway-1		-53.1434	-71.4209
YB4_As03									Diplondontias_singularis			Antarctica	Isla Yerbas Buenas		-52.5075	-73.9669
PN_As04									Diplondontias_singularis			Magellan			-54.9238	-68.3147
TBV_As01									Diplondontias_singularis			Magellan			-54.9267	-67.73
TBV_As02									Diplondontias_singularis			Magellan			-54.9267	-67.73
SORK026	JR15005_1586-13, SORK026-17	1586.13			5790	SORK026-17	JR15005_1586-13		Glabraster_antarctica	BOLD:AAB6633	Glabraster antarctica	South Orkney Islands	79	79	-62.1542	-44.9902	JR15005	14	Camille Moreau	Brussels (ULB)	Ethanol
AIIIS149	SYS-048-01-V1	48-01-V1			338	AIIIS149-15	SYS-048-01-V1		Glabraster_antarctica	BOLD:AAB6633	Glabraster antarctica	Antarctica	Antarctica	48-01			ANDEEP-SYSTCO	129	Camille Moreau	Brussels (ULB)	Ethanol
AIIIS151	SYS-048-01-V3	48-01-V3			343	AIIIS151-15	SYS-048-01-V3		Glabraster_antarctica	BOLD:AAB6633	Glabraster antarctica	Antarctica	Antarctica	48-01			ANDEEP-SYSTCO	130	Camille Moreau	Brussels (ULB)	Ethanol
PTK1_13_2		PTK1_13.2			3898	Macrogen	Macrogen		Glabraster_antarctica	BOLD:AAB6633	Glabraster antarctica	Kerguelen	Port Matha	Port Matha (PTK1_PL06)	-48.935	69.0367	Proteker I	265	Camille Moreau	Brussels (ULB)	Ethanol
JR262_2042		2042			89	ODTNB075-15	JR262-2042		Glabraster_antarctica	BOLD:AAB6633	Glabraster antarctica	South-Georgia	South-Georgia	Event-120	-53.79	-37.22	JR262	464	Camille Moreau	Brussels (ULB)	Ethanol
AIIIS152	SYS-048-01-V4	48-01-V4			344	AIIIS152-15	SYS-048-01-V4		Glabraster_antarctica	BOLD:AAB6633	Glabraster antarctica	Antarctica	Antarctica	48-01			ANDEEP-SYSTCO	1318	Camille Moreau	Brussels (ULB)	Ethanol
AIIIS153	SYS-048-01-V5	48-01-V5			345	AIIIS153-15	SYS-048-01-V5		Glabraster_antarctica	BOLD:AAB6633	Glabraster antarctica	Antarctica	Antarctica	48-01			ANDEEP-SYSTCO	1319	Camille Moreau	Brussels (ULB)	Ethanol
PTK2_37		PTK2_37			3949	Macrogen	Macrogen		Glabraster_antarctica	BOLD:AAB6633	Glabraster antarctica	Kerguelen	Baie de l'Oiseau	Baie de l'Oiseau (PTK2_CH05)	-48.6874	69.0646	Proteker II	1446	Camille Moreau	Brussels (ULB)	Ethanol
ACE_0118.2		ACE ASCCC 0118.2			5877				Glabraster_antarctica	BOLD:AAB6633	Undet	Kerguelen	213	213	-49.7278	64.896	ACE_2017	1583	Camille Moreau	Brussels (ULB)	Ethanol
ACE_1031.2		ACE ASCCC 1031.2			4874				Glabraster_antarctica	BOLD:AAB6633	Glabraster antarctica	Kerguelen	Kerguelen	2766	-49.4374	68.7672	ACE_2017	1711	Camille Moreau	Brussels (ULB)	Ethanol
ACE_1126.5		ACE ASCCC 1126.5			4894				Glabraster_antarctica	BOLD:AAB6633	Glabraster antarctica	Kerguelen	Kerguelen	2770	-49.4374	68.7672	ACE_2017	1846	Camille Moreau	Brussels (ULB)	Ethanol
ACE_0272.30		ACE ASCCC 0272.30			4778				Glabraster_antarctica	BOLD:AAB6633	Glabraster antarctica	Kerguelen	Mont central	272	-51.1471	71.758	ACE_2017	1895	Camille Moreau	Brussels (ULB)	Ethanol
ACE_272_29									Glabraster_antarctica	BOLD:AAB6633		Kerguelen	272		-51.1471	71.758
ASTAN014			IE-2009-6805		844	ASTAN014-10	CEAMARC_V3_5767		Glabraster_antarctica	BOLD:AAB6633	Glabraster antarctica	Antarctica	Adelieland	St56Ev263	-66.5591	-139.485	CEAMARC		Christopher Mah	Paris (MNHN)	Ethanol
ASTAN017			IE-2009-6809		830	ASTAN017-10	CEAMARC_V3_5769		Glabraster_antarctica	BOLD:AAB6633	Glabraster antarctica	Antarctica	Adelieland	St48Ev194	-66.5591	-139.485	CEAMARC		Christopher Mah	Paris (MNHN)	Ethanol
ASTAN040			IE-2009-6834		869	ASTAN040-10	CEAMARC_V3_4		Glabraster_antarctica	BOLD:AAB6633	Glabraster antarctica	Antarctica	Adelieland	St27Ev33	-66.5591	-139.485	CEAMARC		Christopher Mah	Paris (MNHN)	Ethanol
ASTAN068			IE-2009-6869		841	ASTAN068-10	CEAMARC_V3_814		Glabraster_antarctica	BOLD:AAB6633	Glabraster antarctica	Antarctica	Adelieland	St39Ev141	-66.5591	-139.485	CEAMARC		Christopher Mah	Paris (MNHN)	Ethanol
ASTAN098			IE-2009-6914		872	ASTAN098-10	CEAMARC_V3_5864		Glabraster_antarctica	BOLD:AAB6633	Glabraster antarctica	Antarctica	Adelieland	St30Ev66	-66.5591	-139.485	CEAMARC		Christopher Mah	Paris (MNHN)	Ethanol
ASTAN113			IE-2009-6934		831	ASTAN113-10	CEAMARC_V3_5881		Glabraster_antarctica	BOLD:AAB6633	Glabraster antarctica	Antarctica	Adelieland	St50Ev220	-66.5591	-139.485	CEAMARC		Christopher Mah	Paris (MNHN)	Ethanol
ASTAN118			IE-2009-6941		842	ASTAN118-10	CEAMARC_V3_5888		Glabraster_antarctica	BOLD:AAB6633	Glabraster antarctica	Antarctica	Adelieland	St39Ev141	-66.5591	-139.485	CEAMARC		Christopher Mah	Paris (MNHN)	Ethanol
ASTAN160			IE-2009-6999		846	ASTAN160-10	CEAMARC_V3_5940		Glabraster_antarctica	BOLD:AAB6633	Glabraster antarctica	Antarctica	Adelieland	St9Ev117	-66.5591	-139.485	CEAMARC		Christopher Mah	Paris (MNHN)	Ethanol
ASTAN170			IE-2009-7013		840	ASTAN170-10	CEAMARC_V3_5952		Glabraster_antarctica	BOLD:AAB6633	Glabraster antarctica	Antarctica	Adelieland	St7Ev132	-66.5591	-139.485	CEAMARC		Christopher Mah	Paris (MNHN)	Ethanol
ASTAN254			IE-2009-7123		859	ASTAN254-10	CEAMARC_V3_6035		Glabraster_antarctica	BOLD:AAB6633	Glabraster antarctica	Antarctica	Adelieland	St35Ev294	-66.5591	-139.485	CEAMARC		Christopher Mah	Paris (MNHN)	Ethanol
ASTAN384			IE-2009-7243		838	ASTAN384-10	CEAMARC_V3_6147		Glabraster_antarctica	BOLD:AAB6633	Glabraster antarctica	Antarctica	Adelieland	St11Ev429	-66.5591	-139.485	CEAMARC		Christopher Mah	Paris (MNHN)	Ethanol
ASTAN424			IE-2009-7290		886	ASTAN424-10	CEAMARC_V3_6188		Glabraster_antarctica	BOLD:AAB6633	Glabraster antarctica	Antarctica	Adelieland	St87Ev524	-66.5591	-139.485	CEAMARC		Christopher Mah	Paris (MNHN)	Ethanol
BASEC258	JR275_734.2, BASEC258-12	734.2	IE-2013-552		2227	BASEC258-12	JR275_734.2		Glabraster_antarctica	BOLD:AAB6633	Glabraster antarctica	Antarctica	Weddle Sea	Ev49	-75.75	-31.264	JR275		Christopher Mah	Paris (MNHN)	Ethanol
BASEC261	JR275_1452, BASEC261-12	1452	IE-2013-394		2208	BASEC261-12	JR275_1452		Glabraster_antarctica	BOLD:AAB6633	Glabraster antarctica	Antarctica	Weddle Sea	Ev98	-74.636	-28.995	JR275		Christopher Mah	Paris (MNHN)	Ethanol
BASEC273	JR275_822.2, BASEC273-12	822.2	IE-2013-302		2228	BASEC273-12	JR275_822.2		Glabraster_antarctica	BOLD:AAB6633	Glabraster antarctica	Antarctica	Weddle Sea	Ev55	-75.257	-30.264	JR275		Christopher Mah	Paris (MNHN)	Ethanol
BASEC280	JR275_602.1, BASEC280-12	602.1	IE-2013-222		2226	BASEC280-12	JR275_602.1		Glabraster_antarctica	BOLD:AAB6633	Glabraster antarctica	Antarctica	Weddle Sea	Ev43	-75.765	-30.453	JR275		Christopher Mah	Paris (MNHN)	Ethanol
BASEC295	JR275_123.3, BASEC295-12	123.3	IE-2013-678		2210	BASEC295-12	JR275_123.3		Glabraster_antarctica	BOLD:AAB6633	Glabraster antarctica	Antarctica	Weddle Sea	Ev21	-77.355	-35.351	JR275		Christopher Mah	Paris (MNHN)	Ethanol
BASEC298	JR275_10.2, BASEC298-12	10.2	IE-2013-477		2209	BASEC298-12	JR275_10.2		Glabraster_antarctica	BOLD:AAB6633	Glabraster antarctica	Antarctica	Weddle Sea	Ev8	-60.677	-44.013	JR275		Christopher Mah	Paris (MNHN)	Ethanol
BASEC305	JR275_1393.2, BASEC305-12	1393.2	IE-2013-309		2217	BASEC305-12	JR275_1393.2		Glabraster_antarctica	BOLD:AAB6633	Glabraster antarctica	Antarctica	Ev96	Ev96	-74.625	-29.052	JR275		Christopher Mah	Paris (MNHN)	Ethanol
BASEC319	JR275_1372.3	1.3	IE-2013-467		2214	BASEC319-12	JR275_1372.3		Glabraster_antarctica	BOLD:AAB6633	Glabraster antarctica	Antarctica	Weddle Sea	Ev93	-74.698	-29.497	JR275		Christopher Mah	Paris (MNHN)	Ethanol
BASEC385	JR275_526.2, BASEC385-12	526.2	IE-2013-370		2223	BASEC385-12	JR275_526.2		Glabraster_antarctica	BOLD:AAB6633	Glabraster antarctica	Antarctica	Weddle Sea	Ev39	-76.169	-27.797	JR275		Christopher Mah	Paris (MNHN)	Ethanol
BASEC426	JR275_526.15	1361.6	IE-2013-760		2213	BASEC426-12	JR275_1361.6		Glabraster_antarctica	BOLD:AAB6633	Glabraster antarctica	Antarctica	Weddle Sea	Ev92	-76.169	-27.797	JR275		Christopher Mah	Paris (MNHN)	Ethanol
GBMIN141327-18_Glabraster					10814	GBMIN141327-18		KP663829	Glabraster_antarctica	BOLD:AAB6633	Glabraster antarctica	South Orkney Islands	South Orkney Islands	KP663829	-61.04	-44.71	Genbank			Mined from GenBank, NCBI
GBMIN141328-18_Glabraster					10815	GBMIN141328-18		KP663830	Glabraster_antarctica	BOLD:AAB6633	Glabraster antarctica	Antarctica	Enderby	KP663830	-67.21	44.62	Genbank			Mined from GenBank, NCBI
GBMIN141329-18_Glabraster					10816	GBMIN141329-18		KP663831	Glabraster_antarctica	BOLD:AAB6633	Glabraster antarctica	Antarctica	Enderby	KP663831	-67.21	44.62	Genbank			Mined from GenBank, NCBI
GBMIN141330-18_Glabraster					10817	GBMIN141330-18		KP663832	Glabraster_antarctica	BOLD:AAB6633	Glabraster antarctica	Antarctica	Enderby	KP663832	-67.21	44.62	Genbank			Mined from GenBank, NCBI
GBMIN141331-18_Glabraster					10818	GBMIN141331-18		KP663833	Glabraster_antarctica	BOLD:AAB6633	Glabraster antarctica	Antarctica	Enderby	KP663833	-67.21	44.62	Genbank			Mined from GenBank, NCBI
GBMIN141332-18_Glabraster					10819	GBMIN141332-18		KP663834	Glabraster_antarctica	BOLD:AAB6633	Glabraster antarctica	Antarctica	Enderby	KP663834	-67.21	44.62	Genbank			Mined from GenBank, NCBI
GBMIN141333-18_Glabraster					10820	GBMIN141333-18		KP663835	Glabraster_antarctica	BOLD:AAB6633	Glabraster antarctica	Antarctica	Enderby	KP663835	-67.21	44.62	Genbank			Mined from GenBank, NCBI
GBMIN141334-18_Glabraster					10821	GBMIN141334-18		KP663836	Glabraster_antarctica	BOLD:AAB6633	Glabraster antarctica	Antarctica	Enderby	KP663836	-67.21	44.62	Genbank			Mined from GenBank, NCBI
GBMIN141335-18_Glabraster					10822	GBMIN141335-18		KP663837	Glabraster_antarctica	BOLD:AAB6633	Glabraster antarctica	Antarctica	Enderby	KP663837	-67.21	44.62	Genbank			Mined from GenBank, NCBI
GBMIN141336-18_Glabraster					10823	GBMIN141336-18		KP663838	Glabraster_antarctica	BOLD:AAB6633	Glabraster antarctica	Heard Island	Aurora bank	KP663838	-52.48	72.04	Genbank			Mined from GenBank, NCBI
GBMIN141337-18_Glabraster					10824	GBMIN141337-18		KP663839	Glabraster_antarctica	BOLD:AAB6633	Glabraster antarctica	Heard Island	Aurora bank	KP663839	-52.48	72.04	Genbank			Mined from GenBank, NCBI
GBMIN141338-18_Glabraster					10825	GBMIN141338-18		KP663840	Glabraster_antarctica	BOLD:AAB6633	Glabraster antarctica	Heard Island	Aurora bank	KP663840	-52.48	72.04	Genbank			Mined from GenBank, NCBI
GBMIN141339-18_Glabraster					10826	GBMIN141339-18		KP663841	Glabraster_antarctica	BOLD:AAB6633	Glabraster antarctica	Heard Island	Aurora bank	KP663841	-52.48	72.04	Genbank			Mined from GenBank, NCBI
GBMIN141340-18_Glabraster					10827	GBMIN141340-18		KP663842	Glabraster_antarctica	BOLD:AAB6633	Glabraster antarctica	Heard Island	Aurora bank	KP663842	-52.48	72.04	Genbank			Mined from GenBank, NCBI
GBMIN141341-18_Glabraster					10828	GBMIN141341-18		KP663843	Glabraster_antarctica	BOLD:AAB6633	Glabraster antarctica	Heard Island	Aurora bank	KP663843	-52.48	72.04	Genbank			Mined from GenBank, NCBI
GBMIN141342-18_Glabraster					10829	GBMIN141342-18		KP663844	Glabraster_antarctica	BOLD:AAB6633	Glabraster antarctica	Heard Island	Aurora bank	KP663844	-52.48	72.04	Genbank			Mined from GenBank, NCBI
GBMIN141343-18_Glabraster					10830	GBMIN141343-18		KP663845	Glabraster_antarctica	BOLD:AAB6633	Glabraster antarctica	Heard Island	Aurora bank	KP663845	-52.48	72.04	Genbank			Mined from GenBank, NCBI
GBMIN141344-18_Glabraster					10831	GBMIN141344-18		KP663846	Glabraster_antarctica	BOLD:AAB6633	Glabraster antarctica	Heard Island	Aurora bank	KP663846	-52.48	72.04	Genbank			Mined from GenBank, NCBI
GBMIN141345-18_Glabraster					10832	GBMIN141345-18		KP663847	Glabraster_antarctica	BOLD:AAB6633	Glabraster antarctica	Heard Island	Aurora bank	KP663847	-52.48	72.04	Genbank			Mined from GenBank, NCBI
GBMIN141346-18_Glabraster					10833	GBMIN141346-18		KP663848	Glabraster_antarctica	BOLD:AAB6633	Glabraster antarctica	Heard Island	Aurora bank	KP663848	-52.48	72.04	Genbank			Mined from GenBank, NCBI
GBMIN141347-18_Glabraster					10834	GBMIN141347-18		KP663849	Glabraster_antarctica	BOLD:AAB6633	Glabraster antarctica	Heard Island	Aurora bank	KP663849	-52.48	72.04	Genbank			Mined from GenBank, NCBI
GBMIN141348-18_Glabraster					10835	GBMIN141348-18		KP663850	Glabraster_antarctica	BOLD:AAB6633	Glabraster antarctica	Heard Island	Coral bank	KP663850	-51.94	71.29	Genbank			Mined from GenBank, NCBI
GBMIN141349-18_Glabraster					10836	GBMIN141349-18		KP663851	Glabraster_antarctica	BOLD:AAB6633	Glabraster antarctica	South Orkney Islands	South Orkney Islands	KP663851	-61.04	-44.71	Genbank			Mined from GenBank, NCBI
GBMIN141350-18_Glabraster					10837	GBMIN141350-18		KP663852	Glabraster_antarctica	BOLD:AAB6633	Glabraster antarctica	South Orkney Islands	South Orkney Islands	KP663852	-61.04	-44.71	Genbank			Mined from GenBank, NCBI
GBMIN141351-18_Glabraster					10838	GBMIN141351-18		KP663853	Glabraster_antarctica	BOLD:AAB6633	Glabraster antarctica	South Orkney Islands	South Orkney Islands	KP663853	-61.04	-44.71	Genbank			Mined from GenBank, NCBI
GBMIN141352-18_Glabraster					10839	GBMIN141352-18		KP663854	Glabraster_antarctica	BOLD:AAB6633	Glabraster antarctica	South Orkney Islands	South Orkney Islands	KP663854	-61.04	-44.71	Genbank			Mined from GenBank, NCBI
GBMIN141353-18_Glabraster					10840	GBMIN141353-18		KP663855	Glabraster_antarctica	BOLD:AAB6633	Glabraster antarctica	South Orkney Islands	South Orkney Islands	KP663855	-61.04	-44.71	Genbank			Mined from GenBank, NCBI
GBMIN141354-18_Glabraster					10841	GBMIN141354-18		KP663856	Glabraster_antarctica	BOLD:AAB6633	Glabraster antarctica	South Orkney Islands	South Orkney Islands	KP663856	-61.04	-44.71	Genbank			Mined from GenBank, NCBI
GBMIN141355-18_Glabraster					10842	GBMIN141355-18		KP663857	Glabraster_antarctica	BOLD:AAB6633	Glabraster antarctica	South Orkney Islands	South Orkney Islands	KP663857	-61.04	-44.71	Genbank			Mined from GenBank, NCBI
GBMIN141356-18_Glabraster					10843	GBMIN141356-18		KP663858	Glabraster_antarctica	BOLD:AAB6633	Glabraster antarctica	South Orkney Islands	South Orkney Islands	KP663858	-61.04	-44.71	Genbank			Mined from GenBank, NCBI
GBMIN141357-18_Glabraster					10844	GBMIN141357-18		KP663859	Glabraster_antarctica	BOLD:AAB6633	Glabraster antarctica	South Orkney Islands	South Orkney Islands	KP663859	-61.04	-44.71	Genbank			Mined from GenBank, NCBI
GBMIN141360-18_Glabraster					10847	GBMIN141360-18		KP663862	Glabraster_antarctica	BOLD:AAB6633	Glabraster antarctica	Antarctica	Ross Sea	KP663862	-67.82	179.63	Genbank			Mined from GenBank, NCBI
GBMIN141361-18_Glabraster					10848	GBMIN141361-18		KP663863	Glabraster_antarctica	BOLD:AAB6633	Glabraster antarctica	Antarctica	Ross Sea	KP663863	-67.82	179.63	Genbank			Mined from GenBank, NCBI
GBMIN141370-18_Glabraster					10857	GBMIN141370-18		KP663872	Glabraster_antarctica	BOLD:AAB6633	Glabraster antarctica	Antarctica	Ross Sea	KP663872	-67.82	179.63	Genbank			Mined from GenBank, NCBI
GBMIN141371-18_Glabraster					10858	GBMIN141371-18		KP663873	Glabraster_antarctica	BOLD:AAB6633	Glabraster antarctica	Antarctica	Ross Sea	KP663873	-67.82	179.63	Genbank			Mined from GenBank, NCBI
GBMIN141372-18_Glabraster					10859	GBMIN141372-18		KP663874	Glabraster_antarctica	BOLD:AAB6633	Glabraster antarctica	Antarctica	Ross Sea	KP663874	-67.82	179.63	Genbank			Mined from GenBank, NCBI
GBMIN141373-18_Glabraster					10860	GBMIN141373-18		KP663875	Glabraster_antarctica	BOLD:AAB6633	Glabraster antarctica	Antarctica	Ross Sea	KP663875	-67.82	179.63	Genbank			Mined from GenBank, NCBI
GBMIN141374-18_Glabraster					10861	GBMIN141374-18		KP663876	Glabraster_antarctica	BOLD:AAB6633	Glabraster antarctica	Antarctica	Ross Sea	KP663876	-67.82	179.63	Genbank			Mined from GenBank, NCBI
GBMIN141375-18_Glabraster					10862	GBMIN141375-18		KP663877	Glabraster_antarctica	BOLD:AAB6633	Glabraster antarctica	Antarctica	Ross Sea	KP663877	-67.82	179.63	Genbank			Mined from GenBank, NCBI
GBMIN141376-18_Glabraster					10863	GBMIN141376-18		KP663878	Glabraster_antarctica	BOLD:AAB6633	Glabraster antarctica	Antarctica	Ross Sea	KP663878	-67.82	179.63	Genbank			Mined from GenBank, NCBI
GBMIN141377-18_Glabraster					10864	GBMIN141377-18		KP663879	Glabraster_antarctica	BOLD:AAB6633	Glabraster antarctica	Antarctica	Ross Sea	KP663879	-67.82	179.63	Genbank			Mined from GenBank, NCBI
GBMIN141378-18_Glabraster					10865	GBMIN141378-18		KP663880	Glabraster_antarctica	BOLD:AAB6633	Glabraster antarctica	Antarctica	Ross Sea	KP663880	-67.82	179.63	Genbank			Mined from GenBank, NCBI
GBMIN141379-18_Glabraster					10866	GBMIN141379-18		KP663881	Glabraster_antarctica	BOLD:AAB6633	Glabraster antarctica	Antarctica	Ross Sea	KP663881	-67.82	179.63	Genbank			Mined from GenBank, NCBI
GBMIN141380-18_Glabraster					10867	GBMIN141380-18		KP663882	Glabraster_antarctica	BOLD:AAB6633	Glabraster antarctica	Antarctica	Ross Sea	KP663882	-67.82	179.63	Genbank			Mined from GenBank, NCBI
GBMIN141381-18_Glabraster					10868	GBMIN141381-18		KP663883	Glabraster_antarctica	BOLD:AAB6633	Glabraster antarctica	Antarctica	Ross Sea	KP663883	-67.82	179.63	Genbank			Mined from GenBank, NCBI
GBMIN141382-18_Glabraster					10869	GBMIN141382-18		KP663884	Glabraster_antarctica	BOLD:AAB6633	Glabraster antarctica	Antarctica	Ross Sea	KP663884	-67.82	179.63	Genbank			Mined from GenBank, NCBI
GBMIN141383-18_Glabraster					10870	GBMIN141383-18		KP663885	Glabraster_antarctica	BOLD:AAB6633	Glabraster antarctica	Antarctica	Ross Sea	KP663885	-67.82	179.63	Genbank			Mined from GenBank, NCBI
GBMIN141384-18_Glabraster					10871	GBMIN141384-18		KP663886	Glabraster_antarctica	BOLD:AAB6633	Glabraster antarctica	Antarctica	Ross Sea	KP663886	-67.82	179.63	Genbank			Mined from GenBank, NCBI
GBMIN141385-18_Glabraster					10872	GBMIN141385-18		KP663887	Glabraster_antarctica	BOLD:AAB6633	Glabraster antarctica	Antarctica	Ross Sea	KP663887	-67.82	179.63	Genbank			Mined from GenBank, NCBI
GBMIN141386-18_Glabraster					10873	GBMIN141386-18		KP663888	Glabraster_antarctica	BOLD:AAB6633	Glabraster antarctica	Antarctica	Ross Sea	KP663888	-67.82	179.63	Genbank			Mined from GenBank, NCBI
GBMIN141387-18_Glabraster					10874	GBMIN141387-18		KP663889	Glabraster_antarctica	BOLD:AAB6633	Glabraster antarctica	Antarctica	Ross Sea	KP663889	-67.82	179.63	Genbank			Mined from GenBank, NCBI
GBMIN141388-18_Glabraster					10875	GBMIN141388-18		KP663890	Glabraster_antarctica	BOLD:AAB6633	Glabraster antarctica	Antarctica	Ross Sea	KP663890	-67.82	179.63	Genbank			Mined from GenBank, NCBI
GBMIN141389-18_Glabraster					10876	GBMIN141389-18		KP663891	Glabraster_antarctica	BOLD:AAB6633	Glabraster antarctica	Antarctica	Ross Sea	KP663891	-67.82	179.63	Genbank			Mined from GenBank, NCBI
GBMIN141390-18_Glabraster					10877	GBMIN141390-18		KP663892	Glabraster_antarctica	BOLD:AAB6633	Glabraster antarctica	Antarctica	Ross Sea	KP663892	-67.82	179.63	Genbank			Mined from GenBank, NCBI
GBMIN141391-18_Glabraster					10878	GBMIN141391-18		KP663893	Glabraster_antarctica	BOLD:AAB6633	Glabraster antarctica	Antarctica	Ross Sea	KP663893	-67.82	179.63	Genbank			Mined from GenBank, NCBI
GBMIN141392-18_Glabraster					10879	GBMIN141392-18		KP663894	Glabraster_antarctica	BOLD:AAB6633	Glabraster antarctica	Antarctica	Ross Sea	KP663894	-67.82	179.63	Genbank			Mined from GenBank, NCBI
GBMIN141393-18_Glabraster					10880	GBMIN141393-18		KP663895	Glabraster_antarctica	BOLD:AAB6633	Glabraster antarctica	Antarctica	Ross Sea	KP663895	-67.82	179.63	Genbank			Mined from GenBank, NCBI
GBMIN141394-18_Glabraster					10881	GBMIN141394-18		KP663896	Glabraster_antarctica	BOLD:AAB6633	Glabraster antarctica	Antarctica	Ross Sea	KP663896	-67.82	179.63	Genbank			Mined from GenBank, NCBI
GBMIN141395-18_Glabraster					10882	GBMIN141395-18		KP663897	Glabraster_antarctica	BOLD:AAB6633	Glabraster antarctica	Antarctica	Ross Sea	KP663897	-67.82	179.63	Genbank			Mined from GenBank, NCBI
GBMIN141396-18_Glabraster					10883	GBMIN141396-18		KP663898	Glabraster_antarctica	BOLD:AAB6633	Glabraster antarctica	Antarctica	East shelf	KP663898	-65.84	89.54	Genbank			Mined from GenBank, NCBI
GBMIN141397-18_Glabraster					10884	GBMIN141397-18		KP663899	Glabraster_antarctica	BOLD:AAB6633	Glabraster antarctica	Antarctica	East shelf	KP663899	-65.84	89.54	Genbank			Mined from GenBank, NCBI
GBMIN141398-18_Glabraster					10885	GBMIN141398-18		KP663900	Glabraster_antarctica	BOLD:AAB6633	Glabraster antarctica	Antarctica	East shelf	KP663900	-65.84	89.54	Genbank			Mined from GenBank, NCBI
GBMIN141399-18_Glabraster					10886	GBMIN141399-18		KP663901	Glabraster_antarctica	BOLD:AAB6633	Glabraster antarctica	Antarctica	East shelf	KP663901	-65.84	89.54	Genbank			Mined from GenBank, NCBI
GBMIN141400-18_Glabraster					10887	GBMIN141400-18		KP663902	Glabraster_antarctica	BOLD:AAB6633	Glabraster antarctica	Antarctica	East shelf	KP663902	-65.84	89.54	Genbank			Mined from GenBank, NCBI
GBMIN141401-18_Glabraster					10888	GBMIN141401-18		KP663903	Glabraster_antarctica	BOLD:AAB6633	Glabraster antarctica	Antarctica	East shelf	KP663903	-65.84	89.54	Genbank			Mined from GenBank, NCBI
GBMIN141402-18_Glabraster					10889	GBMIN141402-18		KP663904	Glabraster_antarctica	BOLD:AAB6633	Glabraster antarctica	Antarctica	East shelf	KP663904	-65.84	89.54	Genbank			Mined from GenBank, NCBI
GBMIN141403-18_Glabraster					10890	GBMIN141403-18		KP663905	Glabraster_antarctica	BOLD:AAB6633	Glabraster antarctica	Antarctica	East shelf	KP663905	-65.84	89.54	Genbank			Mined from GenBank, NCBI
GBMIN141404-18_Glabraster					10891	GBMIN141404-18		KP663906	Glabraster_antarctica	BOLD:AAB6633	Glabraster antarctica	Antarctica	East shelf	KP663906	-65.84	89.54	Genbank			Mined from GenBank, NCBI
GBMIN141405-18_Glabraster					10892	GBMIN141405-18		KP663907	Glabraster_antarctica	BOLD:AAB6633	Glabraster antarctica	Antarctica	East shelf	KP663907	-65.84	89.54	Genbank			Mined from GenBank, NCBI
GBMIN141406-18_Glabraster					10893	GBMIN141406-18		KP663908	Glabraster_antarctica	BOLD:AAB6633	Glabraster antarctica	Antarctica	East shelf	KP663908	-65.84	89.54	Genbank			Mined from GenBank, NCBI
GBMIN141407-18_Glabraster					10894	GBMIN141407-18		KP663909	Glabraster_antarctica	BOLD:AAB6633	Glabraster antarctica	Heard Island	Aurora bank	KP663909	-52.48	72.04	Genbank			Mined from GenBank, NCBI
GBMIN141408-18_Glabraster					10895	GBMIN141408-18		KP663910	Glabraster_antarctica	BOLD:AAB6633	Glabraster antarctica	Heard Island	Coral bank	KP663910	-51.94	71.29	Genbank			Mined from GenBank, NCBI
GBMIN141409-18_Glabraster					10896	GBMIN141409-18		KP663911	Glabraster_antarctica	BOLD:AAB6633	Glabraster antarctica	Heard Island	Coral bank	KP663911	-51.94	71.29	Genbank			Mined from GenBank, NCBI
GBMIN141410-18_Glabraster					10897	GBMIN141410-18		KP663912	Glabraster_antarctica	BOLD:AAB6633	Glabraster antarctica	Heard Island	Coral bank	KP663912	-51.94	71.29	Genbank			Mined from GenBank, NCBI
GBMIN141411-18_Glabraster					10898	GBMIN141411-18		KP663913	Glabraster_antarctica	BOLD:AAB6633	Glabraster antarctica	Heard Island	Coral bank	KP663913	-51.94	71.29	Genbank			Mined from GenBank, NCBI
GBMIN141412-18_Glabraster					10899	GBMIN141412-18		KP663914	Glabraster_antarctica	BOLD:AAB6633	Glabraster antarctica	Heard Island	Coral bank	KP663914	-51.94	71.29	Genbank			Mined from GenBank, NCBI
GBMIN141413-18_Glabraster					10900	GBMIN141413-18		KP663915	Glabraster_antarctica	BOLD:AAB6633	Glabraster antarctica	South Sandwich	South Sandwich	KP663915	-58.42	-26.24	Genbank			Mined from GenBank, NCBI
GBMIN141414-18_Glabraster					10901	GBMIN141414-18		KP663916	Glabraster_antarctica	BOLD:AAB6633	Glabraster antarctica	South Sandwich	South Sandwich	KP663916	-58.42	-26.24	Genbank			Mined from GenBank, NCBI
GBMIN141415-18_Glabraster					10902	GBMIN141415-18		KP663917	Glabraster_antarctica	BOLD:AAB6633	Glabraster antarctica	South Sandwich	South Sandwich	KP663917	-58.42	-26.24	Genbank			Mined from GenBank, NCBI
GBMIN141416-18_Glabraster					10903	GBMIN141416-18		KP663918	Glabraster_antarctica	BOLD:AAB6633	Glabraster antarctica	South Sandwich	South Sandwich	KP663918	-58.42	-26.24	Genbank			Mined from GenBank, NCBI
GBMIN141417-18_Glabraster					10904	GBMIN141417-18		KP663919	Glabraster_antarctica	BOLD:AAB6633	Glabraster antarctica	South Sandwich	South Sandwich	KP663919	-58.42	-26.24	Genbank			Mined from GenBank, NCBI
GBMIN141418-18_Glabraster					10905	GBMIN141418-18		KP663920	Glabraster_antarctica	BOLD:AAB6633	Glabraster antarctica	South Sandwich	South Sandwich	KP663920	-58.42	-26.24	Genbank			Mined from GenBank, NCBI
GBMIN141419-18_Glabraster					10906	GBMIN141419-18		KP663921	Glabraster_antarctica	BOLD:AAB6633	Glabraster antarctica	South Sandwich	South Sandwich	KP663921	-58.42	-26.24	Genbank			Mined from GenBank, NCBI
GBMIN141420-18_Glabraster					10907	GBMIN141420-18		KP663922	Glabraster_antarctica	BOLD:AAB6633	Glabraster antarctica	South Sandwich	South Sandwich	KP663922	-58.42	-26.24	Genbank			Mined from GenBank, NCBI
GBMIN141421-18_Glabraster					10908	GBMIN141421-18		KP663923	Glabraster_antarctica	BOLD:AAB6633	Glabraster antarctica	South Sandwich	South Sandwich	KP663923	-58.42	-26.24	Genbank			Mined from GenBank, NCBI
GBMIN141422-18_Glabraster					10909	GBMIN141422-18		KP663924	Glabraster_antarctica	BOLD:AAB6633	Glabraster antarctica	South Sandwich	South Sandwich	KP663924	-58.42	-26.24	Genbank			Mined from GenBank, NCBI
GBMIN141423-18_Glabraster					10910	GBMIN141423-18		KP663925	Glabraster_antarctica	BOLD:AAB6633	Glabraster antarctica	South Sandwich	South Sandwich	KP663925	-58.42	-26.24	Genbank			Mined from GenBank, NCBI
GBMIN141424-18_Glabraster					10911	GBMIN141424-18		KP663926	Glabraster_antarctica	BOLD:AAB6633	Glabraster antarctica	South Sandwich	South Sandwich	KP663926	-58.42	-26.24	Genbank			Mined from GenBank, NCBI
GBMIN141425-18_Glabraster					10912	GBMIN141425-18		KP663927	Glabraster_antarctica	BOLD:AAB6633	Glabraster antarctica	South Sandwich	South Sandwich	KP663927	-58.42	-26.24	Genbank			Mined from GenBank, NCBI
GBMIN141426-18_Glabraster					10913	GBMIN141426-18		KP663928	Glabraster_antarctica	BOLD:AAB6633	Glabraster antarctica	South Orkney Islands	Discovery Bank	KP663928	-60.12	-34.89	Genbank			Mined from GenBank, NCBI
GBMIN141427-18_Glabraster					10914	GBMIN141427-18		KP663929	Glabraster_antarctica	BOLD:AAB6633	Glabraster antarctica	South Orkney Islands	Discovery Bank	KP663929	-60.12	-34.89	Genbank			Mined from GenBank, NCBI
GBMIN141428-18_Glabraster					10915	GBMIN141428-18		KP663930	Glabraster_antarctica	BOLD:AAB6633	Glabraster antarctica	South Orkney Islands	Discovery Bank	KP663930	-60.12	-34.89	Genbank			Mined from GenBank, NCBI
GBMIN141429-18_Glabraster					10916	GBMIN141429-18		KP663931	Glabraster_antarctica	BOLD:AAB6633	Glabraster antarctica	South Orkney Islands	Discovery Bank	KP663931	-60.12	-34.89	Genbank			Mined from GenBank, NCBI
GBMIN141430-18_Glabraster					10917	GBMIN141430-18		KP663932	Glabraster_antarctica	BOLD:AAB6633	Glabraster antarctica	South Orkney Islands	Discovery Bank	KP663932	-60.12	-34.89	Genbank			Mined from GenBank, NCBI
GBMIN141431-18_Glabraster					10918	GBMIN141431-18		KP663933	Glabraster_antarctica	BOLD:AAB6633	Glabraster antarctica	South Orkney Islands	Discovery Bank	KP663933	-60.12	-34.89	Genbank			Mined from GenBank, NCBI
GBMIN141432-18_Glabraster					10919	GBMIN141432-18		KP663934	Glabraster_antarctica	BOLD:AAB6633	Glabraster antarctica	South Orkney Islands	Discovery Bank	KP663934	-60.12	-34.89	Genbank			Mined from GenBank, NCBI
GBMIN141433-18_Glabraster					10920	GBMIN141433-18		3935	Glabraster_antarctica	BOLD:AAB6633	Glabraster antarctica	South-Georgia	Shelf	KP663935	-53.78	-37.22	Genbank			Mined from GenBank, NCBI
GBMIN141434-18_Glabraster					10921	GBMIN141434-18		3936	Glabraster_antarctica	BOLD:AAB6633	Glabraster antarctica	South-Georgia	Shelf	KP663936	-53.78	-37.22	Genbank			Mined from GenBank, NCBI
GBMIN141435-18_Glabraster					10922	GBMIN141435-18		3937	Glabraster_antarctica	BOLD:AAB6633	Glabraster antarctica	South-Georgia	Shelf	KP663937	-53.78	-37.22	Genbank			Mined from GenBank, NCBI
GBMIN141436-18_Glabraster					10923	GBMIN141436-18		3938	Glabraster_antarctica	BOLD:AAB6633	Glabraster antarctica	South-Georgia	Shelf	KP663938	-53.78	-37.22	Genbank			Mined from GenBank, NCBI
GBMIN141437-18_Glabraster					10924	GBMIN141437-18		3939	Glabraster_antarctica	BOLD:AAB6633	Glabraster antarctica	South-Georgia	Shelf	KP663939	-53.78	-37.22	Genbank			Mined from GenBank, NCBI
GBMIN141438-18_Glabraster					10925	GBMIN141438-18		3940	Glabraster_antarctica	BOLD:AAB6633	Glabraster antarctica	South-Georgia	Shelf	KP663940	-53.78	-37.22	Genbank			Mined from GenBank, NCBI
GBMIN141439-18_Glabraster					10926	GBMIN141439-18		3941	Glabraster_antarctica	BOLD:AAB6633	Glabraster antarctica	South-Georgia	Shelf	KP663941	-53.78	-37.22	Genbank			Mined from GenBank, NCBI
GBMIN141440-18_Glabraster					10927	GBMIN141440-18		3942	Glabraster_antarctica	BOLD:AAB6633	Glabraster antarctica	South-Georgia	Shelf	KP663942	-53.78	-37.22	Genbank			Mined from GenBank, NCBI
GBMIN141441-18_Glabraster					10928	GBMIN141441-18		3943	Glabraster_antarctica	BOLD:AAB6633	Glabraster antarctica	South-Georgia	Shelf	KP663943	-53.78	-37.22	Genbank			Mined from GenBank, NCBI
GBMIN141442-18_Glabraster					10929	GBMIN141442-18		3944	Glabraster_antarctica	BOLD:AAB6633	Glabraster antarctica	South-Georgia	Shelf	KP663944	-53.78	-37.22	Genbank			Mined from GenBank, NCBI
GBMIN141443-18_Glabraster					10930	GBMIN141443-18		3945	Glabraster_antarctica	BOLD:AAB6633	Glabraster antarctica	South-Georgia	Shelf	KP663945	-53.78	-37.22	Genbank			Mined from GenBank, NCBI
GBMIN141444-18_Glabraster					10931	GBMIN141444-18		3946	Glabraster_antarctica	BOLD:AAB6633	Glabraster antarctica	South-Georgia	Shelf	KP663946	-53.78	-37.22	Genbank			Mined from GenBank, NCBI
GBMIN141445-18_Glabraster					10932	GBMIN141445-18		3947	Glabraster_antarctica	BOLD:AAB6633	Glabraster antarctica	South-Georgia	Shelf	KP663947	-53.78	-37.22	Genbank			Mined from GenBank, NCBI
GBMIN141446-18_Glabraster					10933	GBMIN141446-18		3948	Glabraster_antarctica	BOLD:AAB6633	Glabraster antarctica	South-Georgia	Shelf	KP663948	-53.78	-37.22	Genbank			Mined from GenBank, NCBI
GBMIN141447-18_Glabraster					10934	GBMIN141447-18		3949	Glabraster_antarctica	BOLD:AAB6633	Glabraster antarctica	South-Georgia	Shelf	KP663949	-53.78	-37.22	Genbank			Mined from GenBank, NCBI
GBMIN141448-18_Glabraster					10935	GBMIN141448-18		3950	Glabraster_antarctica	BOLD:AAB6633	Glabraster antarctica	South-Georgia	Shelf	KP663950	-53.78	-37.22	Genbank			Mined from GenBank, NCBI
GBMIN141449-18_Glabraster					10936	GBMIN141449-18		3951	Glabraster_antarctica	BOLD:AAB6633	Glabraster antarctica	South-Georgia	Shelf	KP663951	-53.78	-37.22	Genbank			Mined from GenBank, NCBI
GBMIN141450-18_Glabraster					10937	GBMIN141450-18		3952	Glabraster_antarctica	BOLD:AAB6633	Glabraster antarctica	South-Georgia	Shelf	KP663952	-53.78	-37.22	Genbank			Mined from GenBank, NCBI
GBMIN141451-18_Glabraster					10938	GBMIN141451-18		3953	Glabraster_antarctica	BOLD:AAB6633	Glabraster antarctica	South-Georgia	Shelf	KP663953	-53.78	-37.22	Genbank			Mined from GenBank, NCBI
GBMIN141452-18_Glabraster					10939	GBMIN141452-18		3954	Glabraster_antarctica	BOLD:AAB6633	Glabraster antarctica	South Orkney Islands	Discovery Bank	KP663954	-60.12	-34.89	Genbank			Mined from GenBank, NCBI
GBMIN141453-18_Glabraster					10940	GBMIN141453-18		3955	Glabraster_antarctica	BOLD:AAB6633	Glabraster antarctica	South Orkney Islands	Discovery Bank	KP663955	-60.12	-34.89	Genbank			Mined from GenBank, NCBI
GBMIN141454-18_Glabraster					10941	GBMIN141454-18		3956	Glabraster_antarctica	BOLD:AAB6633	Glabraster antarctica	South Orkney Islands	Discovery Bank	KP663956	-60.12	-34.89	Genbank			Mined from GenBank, NCBI
GBMIN141455-18_Glabraster					10942	GBMIN141455-18		3957	Glabraster_antarctica	BOLD:AAB6633	Glabraster antarctica	South Orkney Islands	Discovery Bank	KP663957	-60.12	-34.89	Genbank			Mined from GenBank, NCBI
GBMIN141456-18_Glabraster					10943	GBMIN141456-18		3958	Glabraster_antarctica	BOLD:AAB6633	Glabraster antarctica	South Orkney Islands	Discovery Bank	KP663958	-60.12	-34.89	Genbank			Mined from GenBank, NCBI
GBMIN141457-18_Glabraster					10944	GBMIN141457-18		3959	Glabraster_antarctica	BOLD:AAB6633	Glabraster antarctica	South Orkney Islands	Discovery Bank	KP663959	-60.12	-34.89	Genbank			Mined from GenBank, NCBI
GBMIN141458-18_Glabraster					10945	GBMIN141458-18		3960	Glabraster_antarctica	BOLD:AAB6633	Glabraster antarctica	Antarctica	Bransfield strait	KP663960	-62.81	-57.27	Genbank			Mined from GenBank, NCBI
GBMIN141459-18_Glabraster					10946	GBMIN141459-18		3961	Glabraster_antarctica	BOLD:AAB6633	Glabraster antarctica	Antarctica	Bransfield strait	KP663961	-62.81	-57.27	Genbank			Mined from GenBank, NCBI
GBMIN141460-18_Glabraster					10947	GBMIN141460-18		3962	Glabraster_antarctica	BOLD:AAB6633	Glabraster antarctica	Antarctica	Bransfield strait	KP663962	-62.81	-57.27	Genbank			Mined from GenBank, NCBI
GBMIN141461-18_Glabraster					10948	GBMIN141461-18		3963	Glabraster_antarctica	BOLD:AAB6633	Glabraster antarctica	Antarctica	Bransfield strait	KP663963	-62.81	-57.27	Genbank			Mined from GenBank, NCBI
GBMIN141462-18_Glabraster					10949	GBMIN141462-18		3964	Glabraster_antarctica	BOLD:AAB6633	Glabraster antarctica	Antarctica	Bransfield strait	KP663964	-62.81	-57.27	Genbank			Mined from GenBank, NCBI
GBMIN141463-18_Glabraster					10950	GBMIN141463-18		3965	Glabraster_antarctica	BOLD:AAB6633	Glabraster antarctica	Antarctica	Bransfield strait	KP663965	-62.81	-57.27	Genbank			Mined from GenBank, NCBI
GBMIN141464-18_Glabraster					10951	GBMIN141464-18		3966	Glabraster_antarctica	BOLD:AAB6633	Glabraster antarctica	South Orkney Islands	Discovery Bank	KP663966	-60.12	-34.89	Genbank			Mined from GenBank, NCBI
GBMIN141465-18_Glabraster					10952	GBMIN141465-18		3967	Glabraster_antarctica	BOLD:AAB6633	Glabraster antarctica	South Orkney Islands	Discovery Bank	KP663967	-60.12	-34.89	Genbank			Mined from GenBank, NCBI
GBMIN141466-18_Glabraster					10953	GBMIN141466-18		3968	Glabraster_antarctica	BOLD:AAB6633	Glabraster antarctica	South Orkney Islands	Discovery Bank	KP663968	-60.12	-34.89	Genbank			Mined from GenBank, NCBI
GBMIN141467-18_Glabraster					10954	GBMIN141467-18		3969	Glabraster_antarctica	BOLD:AAB6633	Glabraster antarctica	South Orkney Islands	Discovery Bank	KP663969	-60.12	-34.89	Genbank			Mined from GenBank, NCBI
GBMIN141468-18_Glabraster					10955	GBMIN141468-18		3970	Glabraster_antarctica	BOLD:AAB6633	Glabraster antarctica	South Orkney Islands	Herdman Bank	KP663970	-59.88	-32.42	Genbank			Mined from GenBank, NCBI
GBMIN141469-18_Glabraster					10956	GBMIN141469-18		3971	Glabraster_antarctica	BOLD:AAB6633	Glabraster antarctica	South Orkney Islands	Herdman Bank	KP663971	-59.88	-32.42	Genbank			Mined from GenBank, NCBI
GBMIN141470-18_Glabraster					10957	GBMIN141470-18		3972	Glabraster_antarctica	BOLD:AAB6633	Glabraster antarctica	South Orkney Islands	Herdman Bank	KP663972	-59.88	-32.42	Genbank			Mined from GenBank, NCBI
GBMIN141471-18_Glabraster					10958	GBMIN141471-18		3973	Glabraster_antarctica	BOLD:AAB6633	Glabraster antarctica	South Orkney Islands	Herdman Bank	KP663973	-59.88	-32.42	Genbank			Mined from GenBank, NCBI
GBMIN141472-18_Glabraster					10959	GBMIN141472-18		3974	Glabraster_antarctica	BOLD:AAB6633	Glabraster antarctica	South Orkney Islands	Herdman Bank	KP663974	-59.88	-32.42	Genbank			Mined from GenBank, NCBI
GBMIN141473-18_Glabraster					10960	GBMIN141473-18		3975	Glabraster_antarctica	BOLD:AAB6633	Glabraster antarctica	South Orkney Islands	Herdman Bank	KP663975	-59.88	-32.42	Genbank			Mined from GenBank, NCBI
GBMIN141474-18_Glabraster					10961	GBMIN141474-18		3976	Glabraster_antarctica	BOLD:AAB6633	Glabraster antarctica	South Orkney Islands	Herdman Bank	KP663976	-59.88	-32.42	Genbank			Mined from GenBank, NCBI
GBMIN141475-18_Glabraster					10962	GBMIN141475-18		3977	Glabraster_antarctica	BOLD:AAB6633	Glabraster antarctica	South Orkney Islands	Herdman Bank	KP663977	-59.88	-32.42	Genbank			Mined from GenBank, NCBI
GBMIN141476-18_Glabraster					10963	GBMIN141476-18		3978	Glabraster_antarctica	BOLD:AAB6633	Glabraster antarctica	South Orkney Islands	Herdman Bank	KP663978	-59.88	-32.42	Genbank			Mined from GenBank, NCBI
GBMIN141477-18_Glabraster					10964	GBMIN141477-18		3979	Glabraster_antarctica	BOLD:AAB6633	Glabraster antarctica	Antarctica	Bransfield strait	KP663979	-62.81	-57.27	Genbank			Mined from GenBank, NCBI
GBMIN141478-18_Glabraster					10965	GBMIN141478-18		3980	Glabraster_antarctica	BOLD:AAB6633	Glabraster antarctica	Antarctica	Bransfield strait	KP663980	-62.81	-57.27	Genbank			Mined from GenBank, NCBI
GBMIN141479-18_Glabraster					10966	GBMIN141479-18		3981	Glabraster_antarctica	BOLD:AAB6633	Glabraster antarctica	Antarctica	Bransfield strait	KP663981	-62.81	-57.27	Genbank			Mined from GenBank, NCBI
GBMIN141480-18_Glabraster					10967	GBMIN141480-18		3982	Glabraster_antarctica	BOLD:AAB6633	Glabraster antarctica	Antarctica	Bransfield strait	KP663982	-62.81	-57.27	Genbank			Mined from GenBank, NCBI
GBMIN141481-18_Glabraster					10968	GBMIN141481-18		3983	Glabraster_antarctica	BOLD:AAB6633	Glabraster antarctica	Patagonian shelf	Burdwood bank	KP663983	-54.68	-60.93	Genbank			Mined from GenBank, NCBI
GBMIN141482-18_Glabraster					10969	GBMIN141482-18		3984	Glabraster_antarctica	BOLD:AAB6633	Glabraster antarctica	Patagonian shelf	Burdwood bank	KP663984	-54.68	-60.93	Genbank			Mined from GenBank, NCBI
GBMIN141483-18_Glabraster					10970	GBMIN141483-18		3985	Glabraster_antarctica	BOLD:AAB6633	Glabraster antarctica	Patagonian shelf	Burdwood bank	KP663985	-54.68	-60.93	Genbank			Mined from GenBank, NCBI
GBMIN141484-18_Glabraster					10971	GBMIN141484-18		3986	Glabraster_antarctica	BOLD:AAB6633	Glabraster antarctica	Patagonian shelf	Burdwood bank	KP663986	-54.68	-60.93	Genbank			Mined from GenBank, NCBI
GBMIN141485-18_Glabraster					10972	GBMIN141485-18		3987	Glabraster_antarctica	BOLD:AAB6633	Glabraster antarctica	Patagonian shelf	Burdwood bank	KP663987	-54.68	-60.93	Genbank			Mined from GenBank, NCBI
GBMIN141486-18_Glabraster					10973	GBMIN141486-18		3988	Glabraster_antarctica	BOLD:AAB6633	Glabraster antarctica	Patagonian shelf	Burdwood bank	KP663988	-54.68	-60.93	Genbank			Mined from GenBank, NCBI
GBMIN141487-18_Glabraster					10974	GBMIN141487-18		3989	Glabraster_antarctica	BOLD:AAB6633	Glabraster antarctica	Patagonian shelf	Burdwood bank	KP663989	-54.68	-60.93	Genbank			Mined from GenBank, NCBI
GBMIN141488-18_Glabraster					10975	GBMIN141488-18		3990	Glabraster_antarctica	BOLD:AAB6633	Glabraster antarctica	Patagonian shelf	Burdwood bank	KP663990	-54.68	-60.93	Genbank			Mined from GenBank, NCBI
GBMIN141489-18_Glabraster					10976	GBMIN141489-18		3991	Glabraster_antarctica	BOLD:AAB6633	Glabraster antarctica	Patagonian shelf	Burdwood bank	KP663991	-54.68	-60.93	Genbank			Mined from GenBank, NCBI
GBMIN141490-18_Glabraster					10977	GBMIN141490-18		3992	Glabraster_antarctica	BOLD:AAB6633	Glabraster antarctica	Patagonian shelf	Burdwood bank	KP663992	-54.68	-60.93	Genbank			Mined from GenBank, NCBI
GBMIN141491-18_Glabraster					10978	GBMIN141491-18		3993	Glabraster_antarctica	BOLD:AAB6633	Glabraster antarctica	Patagonian shelf	Burdwood bank	KP663993	-54.68	-60.93	Genbank			Mined from GenBank, NCBI
GBMIN141492-18_Glabraster					10979	GBMIN141492-18		3994	Glabraster_antarctica	BOLD:AAB6633	Glabraster antarctica	Patagonian shelf	Burdwood bank	KP663994	-54.68	-60.93	Genbank			Mined from GenBank, NCBI
GBMIN141493-18_Glabraster					10980	GBMIN141493-18		3995	Glabraster_antarctica	BOLD:AAB6633	Glabraster antarctica	Patagonian shelf	Burdwood bank	KP663995	-54.68	-60.93	Genbank			Mined from GenBank, NCBI
GBMIN141494-18_Glabraster					10981	GBMIN141494-18		3996	Glabraster_antarctica	BOLD:AAB6633	Glabraster antarctica	Patagonian shelf	Burdwood bank	KP663996	-54.68	-60.93	Genbank			Mined from GenBank, NCBI
GBMIN141495-18_Glabraster					10982	GBMIN141495-18		3997	Glabraster_antarctica	BOLD:AAB6633	Glabraster antarctica	Patagonian shelf	Burdwood bank	KP663997	-54.68	-60.93	Genbank			Mined from GenBank, NCBI
GBMIN141496-18_Glabraster					10983	GBMIN141496-18		3998	Glabraster_antarctica	BOLD:AAB6633	Glabraster antarctica	Patagonian shelf	Burdwood bank	KP663998	-54.68	-60.93	Genbank			Mined from GenBank, NCBI
GBMIN141497-18_Glabraster					10984	GBMIN141497-18		3999	Glabraster_antarctica	BOLD:AAB6633	Glabraster antarctica	Patagonian shelf	Burdwood bank	KP663999	-54.68	-60.93	Genbank			Mined from GenBank, NCBI
GBMIN141498-18_Glabraster					10985	GBMIN141498-18		4000	Glabraster_antarctica	BOLD:AAB6633	Glabraster antarctica	Patagonian shelf	Burdwood bank	KP664000	-54.68	-60.93	Genbank			Mined from GenBank, NCBI
GBMIN141499-18_Glabraster					10986	GBMIN141499-18		4001	Glabraster_antarctica	BOLD:AAB6633	Glabraster antarctica	Patagonian shelf	Burdwood bank	KP664001	-54.68	-60.93	Genbank			Mined from GenBank, NCBI
GBMIN141500-18_Glabraster					10987	GBMIN141500-18		4002	Glabraster_antarctica	BOLD:AAB6633	Glabraster antarctica	Patagonian shelf	Burdwood bank	KP664002	-54.68	-60.93	Genbank			Mined from GenBank, NCBI
GBMIN141501-18_Glabraster					10988	GBMIN141501-18		4003	Glabraster_antarctica	BOLD:AAB6633	Glabraster antarctica	Patagonian shelf	Burdwood bank	KP664003	-54.68	-60.93	Genbank			Mined from GenBank, NCBI
GBMIN141502-18_Glabraster					10989	GBMIN141502-18		4004	Glabraster_antarctica	BOLD:AAB6633	Glabraster antarctica	Patagonian shelf	Burdwood bank	KP664004	-54.68	-60.93	Genbank			Mined from GenBank, NCBI
GBMIN141503-18_Glabraster					10990	GBMIN141503-18		4005	Glabraster_antarctica	BOLD:AAB6633	Glabraster antarctica	Patagonian shelf	Burdwood bank	KP664005	-54.68	-60.93	Genbank			Mined from GenBank, NCBI
GBMIN141504-18_Glabraster					10991	GBMIN141504-18		4006	Glabraster_antarctica	BOLD:AAB6633	Glabraster antarctica	Patagonian shelf	Burdwood bank	KP664006	-54.68	-60.93	Genbank			Mined from GenBank, NCBI
GBMIN141505-18_Glabraster					10992	GBMIN141505-18		4007	Glabraster_antarctica	BOLD:AAB6633	Glabraster antarctica	Patagonian shelf	Burdwood bank	KP664007	-54.68	-60.93	Genbank			Mined from GenBank, NCBI
GBMIN141506-18_Glabraster					10993	GBMIN141506-18		4008	Glabraster_antarctica	BOLD:AAB6633	Glabraster antarctica	Patagonian shelf	Burdwood bank	KP664008	-54.68	-60.93	Genbank			Mined from GenBank, NCBI
GBMIN141507-18_Glabraster					10994	GBMIN141507-18		4009	Glabraster_antarctica	BOLD:AAB6633	Glabraster antarctica	Patagonian shelf	Burdwood bank	KP664009	-54.68	-60.93	Genbank			Mined from GenBank, NCBI
GBMIN141508-18_Glabraster					10995	GBMIN141508-18		4010	Glabraster_antarctica	BOLD:AAB6633	Glabraster antarctica	Patagonian shelf	Burdwood bank	KP664010	-54.68	-60.93	Genbank			Mined from GenBank, NCBI
GBMIN141509-18_Glabraster					10996	GBMIN141509-18		4011	Glabraster_antarctica	BOLD:AAB6633	Glabraster antarctica	Patagonian shelf	Burdwood bank	KP664011	-54.68	-60.93	Genbank			Mined from GenBank, NCBI
GBMIN141510-18_Glabraster					10997	GBMIN141510-18		4012	Glabraster_antarctica	BOLD:AAB6633	Glabraster antarctica	Patagonian shelf	Burdwood bank	KP664012	-54.68	-60.93	Genbank			Mined from GenBank, NCBI
GBMIN141511-18_Glabraster					10998	GBMIN141511-18		4013	Glabraster_antarctica	BOLD:AAB6633	Glabraster antarctica	Antarctica	Bransfield strait	KP664013	-62.81	-57.27	Genbank			Mined from GenBank, NCBI
GBMIN141512-18_Glabraster					10999	GBMIN141512-18		4014	Glabraster_antarctica	BOLD:AAB6633	Glabraster antarctica	Antarctica	Bransfield strait	KP664014	-62.81	-57.27	Genbank			Mined from GenBank, NCBI
GBMIN141513-18_Glabraster					11000	GBMIN141513-18		4015	Glabraster_antarctica	BOLD:AAB6633	Glabraster antarctica	Antarctica	Bransfield strait	KP664015	-62.81	-57.27	Genbank			Mined from GenBank, NCBI
GBMIN141514-18_Glabraster					11001	GBMIN141514-18		4016	Glabraster_antarctica	BOLD:AAB6633	Glabraster antarctica	Antarctica	Bransfield strait	KP664016	-62.81	-57.27	Genbank			Mined from GenBank, NCBI
GBMIN141515-18_Glabraster					11002	GBMIN141515-18		4017	Glabraster_antarctica	BOLD:AAB6633	Glabraster antarctica	Antarctica	Bransfield strait	KP664017	-62.81	-57.27	Genbank			Mined from GenBank, NCBI
GBMIN141516-18_Glabraster					11003	GBMIN141516-18		4018	Glabraster_antarctica	BOLD:AAB6633	Glabraster antarctica	Antarctica	Bransfield strait	KP664018	-62.81	-57.27	Genbank			Mined from GenBank, NCBI
GBMIN141517-18_Glabraster					11004	GBMIN141517-18		4019	Glabraster_antarctica	BOLD:AAB6633	Glabraster antarctica	Antarctica	Bransfield strait	KP664019	-62.81	-57.27	Genbank			Mined from GenBank, NCBI
GBMIN141518-18_Glabraster					11005	GBMIN141518-18		4020	Glabraster_antarctica	BOLD:AAB6633	Glabraster antarctica	Antarctica	Bransfield strait	KP664020	-62.81	-57.27	Genbank			Mined from GenBank, NCBI
GBMIN141519-18_Glabraster					11006	GBMIN141519-18		4021	Glabraster_antarctica	BOLD:AAB6633	Glabraster antarctica	Antarctica	Bransfield strait	KP664021	-62.81	-57.27	Genbank			Mined from GenBank, NCBI
GBMIN141520-18_Glabraster					11007	GBMIN141520-18		4022	Glabraster_antarctica	BOLD:AAB6633	Glabraster antarctica	Antarctica	Bransfield strait	KP664022	-62.81	-57.27	Genbank			Mined from GenBank, NCBI
GBMIN141521-18_Glabraster					11008	GBMIN141521-18		4023	Glabraster_antarctica	BOLD:AAB6633	Glabraster antarctica	Antarctica	Bransfield strait	KP664023	-62.81	-57.27	Genbank			Mined from GenBank, NCBI
GBMIN141522-18_Glabraster					11009	GBMIN141522-18		4024	Glabraster_antarctica	BOLD:AAB6633	Glabraster antarctica	Antarctica	Bransfield strait	KP664024	-62.81	-57.27	Genbank			Mined from GenBank, NCBI
GBMIN141523-18_Glabraster					11010	GBMIN141523-18		4025	Glabraster_antarctica	BOLD:AAB6633	Glabraster antarctica	Antarctica	Bransfield strait	KP664025	-62.81	-57.27	Genbank			Mined from GenBank, NCBI
GBMIN141524-18_Glabraster					11011	GBMIN141524-18		4026	Glabraster_antarctica	BOLD:AAB6633	Glabraster antarctica	Antarctica	Bransfield strait	KP664026	-62.81	-57.27	Genbank			Mined from GenBank, NCBI
GBMIN141525-18_Glabraster					11012	GBMIN141525-18		4027	Glabraster_antarctica	BOLD:AAB6633	Glabraster antarctica	Antarctica	Bransfield strait	KP664027	-62.81	-57.27	Genbank			Mined from GenBank, NCBI
GBMIN141526-18_Glabraster					11013	GBMIN141526-18		4028	Glabraster_antarctica	BOLD:AAB6633	Glabraster antarctica	Antarctica	Bransfield strait	KP664028	-62.81	-57.27	Genbank			Mined from GenBank, NCBI
GBMIN141527-18_Glabraster					11014	GBMIN141527-18		4029	Glabraster_antarctica	BOLD:AAB6633	Glabraster antarctica	Antarctica	Bransfield strait	KP664029	-62.81	-57.27	Genbank			Mined from GenBank, NCBI
GBMIN141528-18_Glabraster					11015	GBMIN141528-18		4030	Glabraster_antarctica	BOLD:AAB6633	Glabraster antarctica	Antarctica	Bransfield strait	KP664030	-62.81	-57.27	Genbank			Mined from GenBank, NCBI
GBMIN141529-18_Glabraster					11016	GBMIN141529-18		4031	Glabraster_antarctica	BOLD:AAB6633	Glabraster antarctica	Antarctica	Bransfield strait	KP664031	-62.81	-57.27	Genbank			Mined from GenBank, NCBI
GBMIN141530-18_Glabraster					11017	GBMIN141530-18		4032	Glabraster_antarctica	BOLD:AAB6633	Glabraster antarctica	Antarctica	Elephant islands	KP664032	-61.18	-54.23	Genbank			Mined from GenBank, NCBI
GBMIN141531-18_Glabraster					11018	GBMIN141531-18		4033	Glabraster_antarctica	BOLD:AAB6633	Glabraster antarctica	Antarctica	Elephant islands	KP664033	-61.18	-54.23	Genbank			Mined from GenBank, NCBI
GBMIN141532-18_Glabraster					11019	GBMIN141532-18		4034	Glabraster_antarctica	BOLD:AAB6633	Glabraster antarctica	Antarctica	Elephant islands	KP664034	-61.18	-54.23	Genbank			Mined from GenBank, NCBI
GBMIN141533-18_Glabraster					11020	GBMIN141533-18		4035	Glabraster_antarctica	BOLD:AAB6633	Glabraster antarctica	Antarctica	Elephant islands	KP664035	-61.18	-54.23	Genbank			Mined from GenBank, NCBI
GBMIN141534-18_Glabraster					11021	GBMIN141534-18		4036	Glabraster_antarctica	BOLD:AAB6633	Glabraster antarctica	Antarctica	Elephant islands	KP664036	-61.18	-54.23	Genbank			Mined from GenBank, NCBI
GBMIN141535-18_Glabraster					11022	GBMIN141535-18		4037	Glabraster_antarctica	BOLD:AAB6633	Glabraster antarctica	Antarctica	Elephant islands	KP664037	-61.18	-54.23	Genbank			Mined from GenBank, NCBI
GBMIN141536-18_Glabraster					11023	GBMIN141536-18		4038	Glabraster_antarctica	BOLD:AAB6633	Glabraster antarctica	Antarctica	Elephant islands	KP664038	-61.18	-54.23	Genbank			Mined from GenBank, NCBI
GBMIN141537-18_Glabraster					11024	GBMIN141537-18		4039	Glabraster_antarctica	BOLD:AAB6633	Glabraster antarctica	Antarctica	Elephant islands	KP664039	-61.18	-54.23	Genbank			Mined from GenBank, NCBI
GBMIN141538-18_Glabraster					11025	GBMIN141538-18		4040	Glabraster_antarctica	BOLD:AAB6633	Glabraster antarctica	Antarctica	Elephant islands	KP664040	-61.18	-54.23	Genbank			Mined from GenBank, NCBI
GBMIN141539-18_Glabraster					11026	GBMIN141539-18		4041	Glabraster_antarctica	BOLD:AAB6633	Glabraster antarctica	Antarctica	Elephant islands	KP664041	-61.18	-54.23	Genbank			Mined from GenBank, NCBI
GBMIN141540-18_Glabraster					11027	GBMIN141540-18		4042	Glabraster_antarctica	BOLD:AAB6633	Glabraster antarctica	Antarctica	Elephant islands	KP664042	-61.18	-54.23	Genbank			Mined from GenBank, NCBI
GBMIN141541-18_Glabraster					11028	GBMIN141541-18		4043	Glabraster_antarctica	BOLD:AAB6633	Glabraster antarctica	Antarctica	Elephant islands	KP664043	-61.18	-54.23	Genbank			Mined from GenBank, NCBI
GBMIN141542-18_Glabraster					11029	GBMIN141542-18		4044	Glabraster_antarctica	BOLD:AAB6633	Glabraster antarctica	Antarctica	Elephant islands	KP664044	-61.18	-54.23	Genbank			Mined from GenBank, NCBI
GBMIN141543-18_Glabraster					11030	GBMIN141543-18		4045	Glabraster_antarctica	BOLD:AAB6633	Glabraster antarctica	Antarctica	Elephant islands	KP664045	-61.18	-54.23	Genbank			Mined from GenBank, NCBI
GBMIN141544-18_Glabraster					11031	GBMIN141544-18		4046	Glabraster_antarctica	BOLD:AAB6633	Glabraster antarctica	Antarctica	Elephant islands	KP664046	-61.18	-54.23	Genbank			Mined from GenBank, NCBI
GBMIN141545-18_Glabraster					11032	GBMIN141545-18		4047	Glabraster_antarctica	BOLD:AAB6633	Glabraster antarctica	Antarctica	Elephant islands	KP664047	-61.18	-54.23	Genbank			Mined from GenBank, NCBI
GBMIN141546-18_Glabraster					11033	GBMIN141546-18		4048	Glabraster_antarctica	BOLD:AAB6633	Glabraster antarctica	Antarctica	Elephant islands	KP664048	-61.18	-54.23	Genbank			Mined from GenBank, NCBI
GBMIN141547-18_Glabraster					11034	GBMIN141547-18		4049	Glabraster_antarctica	BOLD:AAB6633	Glabraster antarctica	Antarctica	Elephant islands	KP664049	-61.18	-54.23	Genbank			Mined from GenBank, NCBI
GBMIN141548-18_Glabraster					11035	GBMIN141548-18		4050	Glabraster_antarctica	BOLD:AAB6633	Glabraster antarctica	Antarctica	Elephant islands	KP664050	-61.18	-54.23	Genbank			Mined from GenBank, NCBI
GBMIN141549-18_Glabraster					11036	GBMIN141549-18		4051	Glabraster_antarctica	BOLD:AAB6633	Glabraster antarctica	Antarctica	Bransfield strait	KP664051	-62.81	-57.27	Genbank			Mined from GenBank, NCBI
GBMIN141550-18_Glabraster					11037	GBMIN141550-18		4052	Glabraster_antarctica	BOLD:AAB6633	Glabraster antarctica	Antarctica	Bransfield strait	KP664052	-62.81	-57.27	Genbank			Mined from GenBank, NCBI
GBMIN141551-18_Glabraster					11038	GBMIN141551-18		4053	Glabraster_antarctica	BOLD:AAB6633	Glabraster antarctica	Antarctica	Bransfield strait	KP664053	-62.81	-57.27	Genbank			Mined from GenBank, NCBI
GBMIN141552-18_Glabraster					11039	GBMIN141552-18		4054	Glabraster_antarctica	BOLD:AAB6633	Glabraster antarctica	Antarctica	Elephant islands	KP664054	-61.18	-54.23	Genbank			Mined from GenBank, NCBI
GBMIN141553-18_Glabraster					11040	GBMIN141553-18		4055	Glabraster_antarctica	BOLD:AAB6633	Glabraster antarctica	Antarctica	Elephant islands	KP664055	-61.18	-54.23	Genbank			Mined from GenBank, NCBI
GBMIN141554-18_Glabraster					11041	GBMIN141554-18		4056	Glabraster_antarctica	BOLD:AAB6633	Glabraster antarctica	Antarctica	Elephant islands	KP664056	-61.18	-54.23	Genbank			Mined from GenBank, NCBI
GBMIN141555-18_Glabraster					11042	GBMIN141555-18		4057	Glabraster_antarctica	BOLD:AAB6633	Glabraster antarctica	Antarctica	Elephant islands	KP664057	-61.18	-54.23	Genbank			Mined from GenBank, NCBI
GBMIN141556-18_Glabraster					11043	GBMIN141556-18		4058	Glabraster_antarctica	BOLD:AAB6633	Glabraster antarctica	Antarctica	Elephant islands	KP664058	-61.18	-54.23	Genbank			Mined from GenBank, NCBI
GBMIN141557-18_Glabraster					11044	GBMIN141557-18		4059	Glabraster_antarctica	BOLD:AAB6633	Glabraster antarctica	Antarctica	Elephant islands	KP664059	-61.18	-54.23	Genbank			Mined from GenBank, NCBI
GBMIN141558-18_Glabraster					11045	GBMIN141558-18		4060	Glabraster_antarctica	BOLD:AAB6633	Glabraster antarctica	Antarctica	Elephant islands	KP664060	-61.18	-54.23	Genbank			Mined from GenBank, NCBI
GBMIN141559-18_Glabraster					11046	GBMIN141559-18		4061	Glabraster_antarctica	BOLD:AAB6633	Glabraster antarctica	Antarctica	Elephant islands	KP664061	-61.18	-54.23	Genbank			Mined from GenBank, NCBI
GBMIN141560-18_Glabraster					11047	GBMIN141560-18		4062	Glabraster_antarctica	BOLD:AAB6633	Glabraster antarctica	Antarctica	Elephant islands	KP664062	-61.18	-54.23	Genbank			Mined from GenBank, NCBI
GBMIN141561-18_Glabraster					11048	GBMIN141561-18		4063	Glabraster_antarctica	BOLD:AAB6633	Glabraster antarctica	Antarctica	Elephant islands	KP664063	-61.18	-54.23	Genbank			Mined from GenBank, NCBI
GBMIN141562-18_Glabraster					11049	GBMIN141562-18		4064	Glabraster_antarctica	BOLD:AAB6633	Glabraster antarctica	Antarctica	Elephant islands	KP664064	-61.18	-54.23	Genbank			Mined from GenBank, NCBI
GBMIN141563-18_Glabraster					11050	GBMIN141563-18		4065	Glabraster_antarctica	BOLD:AAB6633	Glabraster antarctica	Antarctica	Elephant islands	KP664065	-61.18	-54.23	Genbank			Mined from GenBank, NCBI
GBMIN141564-18_Glabraster					11051	GBMIN141564-18		4066	Glabraster_antarctica	BOLD:AAB6633	Glabraster antarctica	Antarctica	Elephant islands	KP664066	-61.18	-54.23	Genbank			Mined from GenBank, NCBI
GBMIN141565-18_Glabraster					11052	GBMIN141565-18		4067	Glabraster_antarctica	BOLD:AAB6633	Glabraster antarctica	Magellan	Strait Magellan	KP664067	-53.56	-70.3	Genbank			Mined from GenBank, NCBI
GBMIN141566-18_Glabraster					11053	GBMIN141566-18		4068	Glabraster_antarctica	BOLD:AAB6633	Glabraster antarctica	Magellan	Strait Magellan	KP664068	-53.56	-70.3	Genbank			Mined from GenBank, NCBI
GBMIN141567-18_Glabraster					11054	GBMIN141567-18		4069	Glabraster_antarctica	BOLD:AAB6633	Glabraster antarctica	Magellan	Strait Magellan	KP664069	-53.56	-70.3	Genbank			Mined from GenBank, NCBI
GBMIN141568-18_Glabraster					11055	GBMIN141568-18		4070	Glabraster_antarctica	BOLD:AAB6633	Glabraster antarctica	Magellan	Strait Magellan	KP664070	-53.56	-70.3	Genbank			Mined from GenBank, NCBI
GBMIN141569-18_Glabraster					11056	GBMIN141569-18		4071	Glabraster_antarctica	BOLD:AAB6633	Glabraster antarctica	Magellan	Strait Magellan	KP664071	-53.56	-70.3	Genbank			Mined from GenBank, NCBI
GBMIN141570-18_Glabraster					11057	GBMIN141570-18		4072	Glabraster_antarctica	BOLD:AAB6633	Glabraster antarctica	Magellan	Strait Magellan	KP664072	-53.56	-70.3	Genbank			Mined from GenBank, NCBI
GBMIN141571-18_Glabraster					11058	GBMIN141571-18		4073	Glabraster_antarctica	BOLD:AAB6633	Glabraster antarctica	Magellan	Strait Magellan	KP664073	-53.56	-70.3	Genbank			Mined from GenBank, NCBI
GBMIN141572-18_Glabraster					11059	GBMIN141572-18		4074	Glabraster_antarctica	BOLD:AAB6633	Glabraster antarctica	Magellan	Strait Magellan	KP664074	-53.56	-70.3	Genbank			Mined from GenBank, NCBI
GBMIN141573-18_Glabraster					11060	GBMIN141573-18		4075	Glabraster_antarctica	BOLD:AAB6633	Glabraster antarctica	Magellan	Strait Magellan	KP664075	-53.56	-70.3	Genbank			Mined from GenBank, NCBI
GBMIN141574-18_Glabraster					11061	GBMIN141574-18		4076	Glabraster_antarctica	BOLD:AAB6633	Glabraster antarctica	Magellan	Strait Magellan	KP664076	-53.56	-70.3	Genbank			Mined from GenBank, NCBI
GBMIN141575-18_Glabraster					11062	GBMIN141575-18		4077	Glabraster_antarctica	BOLD:AAB6633	Glabraster antarctica	Magellan	Strait Magellan	KP664077	-53.56	-70.3	Genbank			Mined from GenBank, NCBI
GBMIN141576-18_Glabraster					11063	GBMIN141576-18		4078	Glabraster_antarctica	BOLD:AAB6633	Glabraster antarctica	Magellan	Strait Magellan	KP664078	-53.56	-70.3	Genbank			Mined from GenBank, NCBI
GBMIN141577-18_Glabraster					11064	GBMIN141577-18		4079	Glabraster_antarctica	BOLD:AAB6633	Glabraster antarctica	Magellan	Strait Magellan	KP664079	-53.56	-70.3	Genbank			Mined from GenBank, NCBI
GBMIN141578-18_Glabraster					11065	GBMIN141578-18		4080	Glabraster_antarctica	BOLD:AAB6633	Glabraster antarctica	Magellan	Strait Magellan	KP664080	-53.56	-70.3	Genbank			Mined from GenBank, NCBI
GBMIN141579-18_Glabraster					11066	GBMIN141579-18		4081	Glabraster_antarctica	BOLD:AAB6633	Glabraster antarctica	Magellan	Strait Magellan	KP664081	-53.56	-70.3	Genbank			Mined from GenBank, NCBI
GBMIN141580-18_Glabraster					11067	GBMIN141580-18		4082	Glabraster_antarctica	BOLD:AAB6633	Glabraster antarctica	Magellan	Strait Magellan	KP664082	-53.56	-70.3	Genbank			Mined from GenBank, NCBI
GBMIN141581-18_Glabraster					11068	GBMIN141581-18		4083	Glabraster_antarctica	BOLD:AAB6633	Glabraster antarctica	Magellan	Strait Magellan	KP664083	-53.56	-70.3	Genbank			Mined from GenBank, NCBI
GBMIN141582-18_Glabraster					11069	GBMIN141582-18		4084	Glabraster_antarctica	BOLD:AAB6633	Glabraster antarctica	Magellan	Strait Magellan	KP664084	-53.56	-70.3	Genbank			Mined from GenBank, NCBI
GBMIN141583-18_Glabraster					11070	GBMIN141583-18		4085	Glabraster_antarctica	BOLD:AAB6633	Glabraster antarctica	Magellan	Strait Magellan	KP664085	-53.56	-70.3	Genbank			Mined from GenBank, NCBI
GBMIN141584-18_Glabraster					11071	GBMIN141584-18		4086	Glabraster_antarctica	BOLD:AAB6633	Glabraster antarctica	Magellan	Strait Magellan	KP664086	-53.56	-70.3	Genbank			Mined from GenBank, NCBI
GBMIN141585-18_Glabraster					11072	GBMIN141585-18		4087	Glabraster_antarctica	BOLD:AAB6633	Glabraster antarctica	South-Georgia	Shag rocks	KP664087	-53.56	-41.65	Genbank			Mined from GenBank, NCBI
GBMIN141586-18_Glabraster					11073	GBMIN141586-18		4088	Glabraster_antarctica	BOLD:AAB6633	Glabraster antarctica	South-Georgia	Shag rocks	KP664088	-53.56	-41.65	Genbank			Mined from GenBank, NCBI
GBMIN141587-18_Glabraster					11074	GBMIN141587-18		4089	Glabraster_antarctica	BOLD:AAB6633	Glabraster antarctica	South-Georgia	Shag rocks	KP664089	-53.56	-41.65	Genbank			Mined from GenBank, NCBI
GBMIN141588-18_Glabraster					11075	GBMIN141588-18		4090	Glabraster_antarctica	BOLD:AAB6633	Glabraster antarctica	South-Georgia	Shag rocks	KP664090	-53.56	-41.65	Genbank			Mined from GenBank, NCBI
GBMIN141589-18_Glabraster					11076	GBMIN141589-18		4091	Glabraster_antarctica	BOLD:AAB6633	Glabraster antarctica	South-Georgia	Shag rocks	KP664091	-53.56	-41.65	Genbank			Mined from GenBank, NCBI
GBMIN141590-18_Glabraster					11077	GBMIN141590-18		4092	Glabraster_antarctica	BOLD:AAB6633	Glabraster antarctica	South-Georgia	Shag rocks	KP664092	-53.56	-41.65	Genbank			Mined from GenBank, NCBI
GBMIN141591-18_Glabraster					11078	GBMIN141591-18		4093	Glabraster_antarctica	BOLD:AAB6633	Glabraster antarctica	South-Georgia	Shag rocks	KP664093	-53.56	-41.65	Genbank			Mined from GenBank, NCBI
GBMIN141592-18_Glabraster					11079	GBMIN141592-18		4094	Glabraster_antarctica	BOLD:AAB6633	Glabraster antarctica	South-Georgia	Shag rocks	KP664094	-53.56	-41.65	Genbank			Mined from GenBank, NCBI
GBMIN141593-18_Glabraster					11080	GBMIN141593-18		4095	Glabraster_antarctica	BOLD:AAB6633	Glabraster antarctica	South-Georgia	Shag rocks	KP664095	-53.56	-41.65	Genbank			Mined from GenBank, NCBI
GBMIN141594-18_Glabraster					11081	GBMIN141594-18		4096	Glabraster_antarctica	BOLD:AAB6633	Glabraster antarctica	Falkland Islands	Falkland Islands	KP664096	-52.1524	-59.9569	Genbank			Mined from GenBank, NCBI
GBMIN141595-18_Glabraster					11082	GBMIN141595-18		4097	Glabraster_antarctica	BOLD:AAB6633	Glabraster antarctica	Falkland Islands	Falkland Islands	KP664097	-52.1524	-59.9569	Genbank			Mined from GenBank, NCBI
GBMIN141596-18_Glabraster					11083	GBMIN141596-18		4098	Glabraster_antarctica	BOLD:AAB6633	Glabraster antarctica	Falkland Islands	Falkland Islands	KP664098	-52.1524	-59.9569	Genbank			Mined from GenBank, NCBI
GBMIN141597-18_Glabraster					11084	GBMIN141597-18		4099	Glabraster_antarctica	BOLD:AAB6633	Glabraster antarctica	Falkland Islands	Falkland Islands	KP664099	-52.1524	-59.9569	Genbank			Mined from GenBank, NCBI
GBMIN141598-18_Glabraster					11085	GBMIN141598-18		4100	Glabraster_antarctica	BOLD:AAB6633	Glabraster antarctica	Falkland Islands	Falkland Islands	KP664100	-52.1524	-59.9569	Genbank			Mined from GenBank, NCBI
GBMIN141599-18_Glabraster					11086	GBMIN141599-18		4101	Glabraster_antarctica	BOLD:AAB6633	Glabraster antarctica	Falkland Islands	Falkland Islands	KP664101	-52.1524	-59.9569	Genbank			Mined from GenBank, NCBI
GBMIN141600-18_Glabraster					11087	GBMIN141600-18		4102	Glabraster_antarctica	BOLD:AAB6633	Glabraster antarctica	Falkland Islands	Falkland Islands	KP664102	-52.1524	-59.9569	Genbank			Mined from GenBank, NCBI
GBMIN141601-18_Glabraster					11088	GBMIN141601-18		4103	Glabraster_antarctica	BOLD:AAB6633	Glabraster antarctica	Falkland Islands	Falkland Islands	KP664103	-52.1524	-59.9569	Genbank			Mined from GenBank, NCBI
GBMIN141602-18_Glabraster					11089	GBMIN141602-18		4104	Glabraster_antarctica	BOLD:AAB6633	Glabraster antarctica	Falkland Islands	Falkland Islands	KP664104	-52.1524	-59.9569	Genbank			Mined from GenBank, NCBI
GBMIN141603-18_Glabraster					11090	GBMIN141603-18		4105	Glabraster_antarctica	BOLD:AAB6633	Glabraster antarctica	Falkland Islands	Falkland Islands	KP664105	-52.1524	-59.9569	Genbank			Mined from GenBank, NCBI
GBMIN141604-18_Glabraster					11091	GBMIN141604-18		4106	Glabraster_antarctica	BOLD:AAB6633	Glabraster antarctica	Falkland Islands	Falkland Islands	KP664106	-52.1524	-59.9569	Genbank			Mined from GenBank, NCBI
GBMIN141605-18_Glabraster					11092	GBMIN141605-18		4107	Glabraster_antarctica	BOLD:AAB6633	Glabraster antarctica	Falkland Islands	Falkland Islands	KP664107	-52.1524	-59.9569	Genbank			Mined from GenBank, NCBI
GBMIN141606-18_Glabraster					11093	GBMIN141606-18		4108	Glabraster_antarctica	BOLD:AAB6633	Glabraster antarctica	Falkland Islands	Falkland Islands	KP664108	-52.1524	-59.9569	Genbank			Mined from GenBank, NCBI
GBMIN141607-18_Glabraster					11094	GBMIN141607-18		4109	Glabraster_antarctica	BOLD:AAB6633	Glabraster antarctica	Falkland Islands	Falkland Islands	KP664109	-52.1524	-59.9569	Genbank			Mined from GenBank, NCBI
GBMIN141608-18_Glabraster					11095	GBMIN141608-18		4110	Glabraster_antarctica	BOLD:AAB6633	Glabraster antarctica	Falkland Islands	Falkland Islands	KP664110	-52.1524	-59.9569	Genbank			Mined from GenBank, NCBI
GBMIN141609-18_Glabraster					11096	GBMIN141609-18		4111	Glabraster_antarctica	BOLD:AAB6633	Glabraster antarctica	Falkland Islands	Falkland Islands	KP664111	-52.1524	-59.9569	Genbank			Mined from GenBank, NCBI
GBMIN141610-18_Glabraster					11097	GBMIN141610-18		4112	Glabraster_antarctica	BOLD:AAB6633	Glabraster antarctica	Falkland Islands	Falkland Islands	KP664112	-52.1524	-59.9569	Genbank			Mined from GenBank, NCBI
GBMIN141611-18_Glabraster					11098	GBMIN141611-18		4113	Glabraster_antarctica	BOLD:AAB6633	Glabraster antarctica	Falkland Islands	Falkland Islands	KP664113	-52.1524	-59.9569	Genbank			Mined from GenBank, NCBI
NZEC682		NZEC682			2989	NZEC682-09	35595-1		Glabraster_antarctica	BOLD:AAB6633	Glabraster antarctica	Antarctica	Ross Sea	TAN0802/22	-74.111	17.0796	NZEC		Kate Neill	Wellington (NIWA)	Unknown
NZEC684		NZEC684			2990	NZEC684-09	35594		Glabraster_antarctica	BOLD:AAB6633	Glabraster antarctica	Antarctica	Ross Sea	TAN0802/22	-74.111	17.0796	NZEC		Kate Neill	Wellington (NIWA)	Unknown
PTK8_119_23									Glabraster_antarctica	BOLD:AAB6633		Kerguelen	Iles du Prince de Monaco		-49.6003	69.2403
PTK8_119_27									Glabraster_antarctica	BOLD:AAB6633		Kerguelen	Iles du Prince de Monaco		-49.6003	69.2403
PTK8_119-15									Glabraster_antarctica	BOLD:AAB6633		Kerguelen	Iles du Prince de Monaco		-49.6003	69.2403
PTK8_119-17_COI									Glabraster_antarctica	BOLD:AAB6633		Kerguelen	Iles du Prince de Monaco		-49.6003	69.2403
PTK8_119-21_COI									Glabraster_antarctica	BOLD:AAB6633		Kerguelen	Iles du Prince de Monaco		-49.6003	69.2403
PTK8_119-26_COI									Glabraster_antarctica	BOLD:AAB6633		Kerguelen	Iles du Prince de Monaco		-49.6003	69.2403
PTK8_2.15		PTK8_2.15			11791				Glabraster_antarctica	BOLD:AAB6633	Glabraster antarctica	Kerguelen	Kerguelen	Crique du Sphinx	-49.4374	68.7672	Proteker VIII		Camille Moreau	Brussels (ULB)	Ethanol
PTK8_55_14									Glabraster_antarctica			Kerguelen
PTK8_55-15_COI									Glabraster_antarctica	BOLD:AAB6633		Kerguelen	Ile Suhm		-49.4934	70.1613
SG1_As-02									Glabraster_antarctica	BOLD:AAB6633		South-Georgia	Grass Island-1		-54.1571	-36.6624
SG12_As-12									Glabraster_antarctica	BOLD:AAB6633		South-Georgia	Esbensen		-54.8669	-35.9631
SG13_As-04									Glabraster_antarctica	BOLD:AAB6633		South-Georgia	Hobart Rock		-54.2891	-36.4885
SG18_As-03									Glabraster_antarctica	BOLD:AAB6633		South-Georgia	Hobart Rock		-54.2891	-36.4885
SG18_As-06									Glabraster_antarctica	BOLD:AAB6633		South-Georgia	Hobart Rock		-54.2891	-36.4885
SG18_As-09									Glabraster_antarctica	BOLD:AAB6633		South-Georgia	Hobart Rock		-54.2891	-36.4885
SG3_As-02									Glabraster_antarctica	BOLD:AAB6633		South-Georgia	Grass Island-2		-54.162	-36.6641
SG3_As-03									Glabraster_antarctica	BOLD:AAB6633		South-Georgia	Grass Island-2		-54.162	-36.6641
SG3_As-04									Glabraster_antarctica	BOLD:AAB6633		South-Georgia	Grass Island-2		-54.162	-36.6641
SG7_As-10									Glabraster_antarctica	BOLD:AAB6633		South-Georgia	Hound Bay		-54.3873	-36.1836
SG8_As-01									Glabraster_antarctica	BOLD:AAB6633		South-Georgia	Cumberland West Bay		-54.2399	-36.5251
SOA005		MPE-12	IE-2011-444		3490	SOA005-12	MPE-12		Glabraster_antarctica	BOLD:AAB6633	Glabraster antarctica	Kerguelen	Chalut 29	Chalut 29	-48.1168	67.7808	POKER II		Christopher Mah	Paris (MNHN)	Ethanol
SOA011		MPE-36	IE-2011-455		3570	SOA011-12	MPE-36		Glabraster_antarctica	BOLD:AAB6633	Glabraster antarctica	Kerguelen	Chalut 54	Chalut 54	-48.1409	70.5559	POKER II		Christopher Mah	Paris (MNHN)	Ethanol
SOA017		MPE-75	IE-2011-466		3578	SOA017-12	MPE-75		Glabraster_antarctica	BOLD:AAB6633	Glabraster antarctica	Kerguelen	Chalut 44	Chalut 44	-47.5454	69.4809	POKER II		Christopher Mah	Paris (MNHN)	Ethanol
SOA020		MPE-89	IE-2011-473		3586	SOA020-12	MPE-89		Glabraster_antarctica	BOLD:AAB6633	Glabraster antarctica	Kerguelen	Chalut 32	Chalut 32	-48.4454	67.8019	POKER II		Christopher Mah	Paris (MNHN)	Ethanol
SOA029		MPE-128	IE-2011-487		3495	SOA029-12	MPE-128		Glabraster_antarctica	BOLD:AAB6633	Glabraster antarctica	Kerguelen	Chalut 65	Chalut 65	-47.0277	70.4654	POKER II		Christopher Mah	Paris (MNHN)	Ethanol
SOA035		MPE-152	IE-2011-494		3508	SOA035-12	MPE-152		Glabraster_antarctica	BOLD:AAB6633	Glabraster antarctica	Kerguelen	Chalut 53	Chalut 53	-48.4399	70.6003	POKER II		Christopher Mah	Paris (MNHN)	Ethanol
SOA074		MPE-311	IE-2011-557		3568	SOA074-12	MPE-311		Glabraster_antarctica	BOLD:AAB6633	Glabraster antarctica	Kerguelen	Chalut 64	Chalut 64	-47.1279	70.5645	POKER II		Christopher Mah	Paris (MNHN)	Ethanol
SOA118	IE-2011-669	MPE-589	IE-2011-669		3574	SOA118-12	MPE-589		Glabraster_antarctica	BOLD:AAB6633	Glabraster antarctica	Kerguelen			-47.405	68.306	POKER II		Christopher Mah	Paris (MNHN)	Ethanol
SOA119		MPE-590	IE-2011-670		3575	SOA119-12	MPE-590		Glabraster_antarctica	BOLD:AAB6633	Glabraster antarctica	Kerguelen	Chalut 9		-47.3932	68.3218	POKER II		Christopher Mah	Paris (MNHN)	Ethanol
SOA121		MPE-606	IE-2011-672		3576	SOA121-12	MPE-606		Glabraster_antarctica	BOLD:AAB6633	Glabraster antarctica	Kerguelen	Chalut 28		-48.0721	67.6048	POKER II		Christopher Mah	Paris (MNHN)	Ethanol
SOA174		MPE-859	IE-2011-797		3584	SOA174-12	MPE-859		Glabraster_antarctica	BOLD:AAB6633	Glabraster antarctica	Kerguelen	Chalut 153		-49.3682	67.62	POKER II		Christopher Mah	Paris (MNHN)	Ethanol
SOA176		MPE-881	IE-2011-802		3585	SOA176-12	MPE-881		Glabraster_antarctica	BOLD:AAB6633	Glabraster antarctica	Kerguelen	Chalut 43		-47.4425	69.2102	POKER II		Christopher Mah	Paris (MNHN)	Ethanol
SOA185		MPE-910	IE-2011-814		3590	SOA185-12	MPE-910		Glabraster_antarctica	BOLD:AAB6633	Glabraster antarctica	Kerguelen	Chalut 46		-47.7523	69.6229	POKER II		Christopher Mah	Paris (MNHN)	Ethanol
SOA186		MPE-911	IE-2011-815		3591	SOA186-12	MPE-911		Glabraster_antarctica	BOLD:AAB6633	Glabraster antarctica	Kerguelen	Chalut 46		-47.7523	69.6229	POKER II		Christopher Mah	Paris (MNHN)	Ethanol
SOA236		MPE-1222	IE-2011-933		3491	SOA236-12	MPE-1222		Glabraster_antarctica	BOLD:AAB6633	Glabraster antarctica	Kerguelen	Chalut 48		-48.0623	70.2017	POKER II		Christopher Mah	Paris (MNHN)	Ethanol
SOA254		MPE-1344	IE-2011-998		3815	SOA254-12	MPE-1344		Glabraster_antarctica	BOLD:AAB6633	Glabraster antarctica	Kerguelen	Chalut 146		-49.7402	68.3605	POKER II		Christopher Mah	Paris (MNHN)	Ethanol
SOA299	IE-2011-1082	MPE-1542	IE-2011-1082		3513	SOA299-12	MPE-1542		Glabraster_antarctica	BOLD:AAB6633	Glabraster antarctica	Kerguelen	Chalut 38	Chalut 38	-48.12	68.157	POKER II		Christopher Mah	Paris (MNHN)	Ethanol
SOA309		MPE-1578	IE-2011-1100		3514	SOA309-12	MPE-1578		Glabraster_antarctica	BOLD:AAB6633	Glabraster antarctica	Kerguelen	Chalut 30	Chalut 30	-48.2368	67.7858	POKER II		Christopher Mah	Paris (MNHN)	Ethanol
SOA327	IE-2011-1159	MPE-1703	IE-2011-1159		3519	SOA327-12	MPE-1703		Glabraster_antarctica	BOLD:AAB6633	Glabraster antarctica	Kerguelen	Chalut 98	Chalut 98	-49.217	70.932	POKER II		Christopher Mah	Paris (MNHN)	Ethanol
SOA357		MPE-1845	IE-2011-1211		3523	SOA357-12	MPE-1845		Glabraster_antarctica	BOLD:AAB6633	Glabraster antarctica	Kerguelen	Chalut 99	Chalut 99	-49.099	70.8937	POKER II		Christopher Mah	Paris (MNHN)	Ethanol
SOA371		MPE-1913	IE-2011-1245		3528	SOA371-12	MPE-1913		Glabraster_antarctica	BOLD:AAB6633	Glabraster antarctica	Kerguelen	Chalut 51	Chalut 51	-48.6969	70.3333	POKER II		Christopher Mah	Paris (MNHN)	Ethanol
SOA386		MPE-1989	IE-2011-1279		3533	SOA386-12	MPE-1989		Glabraster_antarctica	BOLD:AAB6633	Glabraster antarctica	Kerguelen	Chalut 50	Chalut 50	-48.8442	70.1125	POKER II		Christopher Mah	Paris (MNHN)	Ethanol
SOA388		MPE-2032	IE-2011-1301		3534	SOA388-12	MPE-2032		Glabraster_antarctica	BOLD:AAB6633	Glabraster antarctica	Kerguelen	Chalut 205	Chalut 205	-48.4493	70.058	POKER II		Christopher Mah	Paris (MNHN)	Ethanol
SOA396		MPE-2069	IE-2011-1317		3536	SOA396-12	MPE-2069		Glabraster_antarctica	BOLD:AAB6633	Glabraster antarctica	Kerguelen	Chalut 209	Chalut 209	-48.7101	70.9591	POKER II		Christopher Mah	Paris (MNHN)	Ethanol
SOA409		MPE-2120	IE-2011-10		3537	SOA409-12	MPE-2120		Glabraster_antarctica	BOLD:AAB6633	Glabraster antarctica	Kerguelen	Chalut 40	Chalut 40	-48.242	68.5551	POKER II		Christopher Mah	Paris (MNHN)	Ethanol
SOA410		MPE-2121	IE-2011-11		3538	SOA410-12	MPE-2121		Glabraster_antarctica	BOLD:AAB6633	Glabraster antarctica	Kerguelen	Chalut 40	Chalut 40	-48.242	68.5551	POKER II		Christopher Mah	Paris (MNHN)	Ethanol
SOA422		MPE-2192	IE-2011-41		3542	SOA422-12	MPE-2192		Glabraster_antarctica	BOLD:AAB6633	Glabraster antarctica	Kerguelen	Chalut 52	Chalut 52	-48.5632	70.5399	POKER II		Christopher Mah	Paris (MNHN)	Ethanol
SOA427		MPE-2230	IE-2011-49		3544	SOA427-12	MPE-2230		Glabraster_antarctica	BOLD:AAB6633	Glabraster antarctica	Kerguelen	Chalut 49	Chalut 49	-48.9827	69.9725	POKER II		Christopher Mah	Paris (MNHN)	Ethanol
SOA444		MPE-2360	IE-2011-90		3548	SOA444-12	MPE-2360		Glabraster_antarctica	BOLD:AAB6633	Glabraster antarctica	Kerguelen	Chalut 33		-48.503	67.9006	POKER II		Christopher Mah	Paris (MNHN)	Ethanol
SOA446		MPE-2376	IE-2011-94		3549	SOA446-12	MPE-2376		Glabraster_antarctica	BOLD:AAB6633	Glabraster antarctica	Kerguelen	Chalut 58		-48.0443	69.5455	POKER II		Christopher Mah	Paris (MNHN)	Ethanol
SOA459		MPE-2431	IE-2011-128		3553	SOA459-12	MPE-2431		Glabraster_antarctica	BOLD:AAB6633	Glabraster antarctica	Kerguelen	Chalut 56	Chalut 56	-48.133	69.1069	POKER II		Christopher Mah	Paris (MNHN)	Ethanol
SOA460		MPE-2432	IE-2011-129		3554	SOA460-12	MPE-2432		Glabraster_antarctica	BOLD:AAB6633	Glabraster antarctica	Kerguelen	Chalut 56	Chalut 56	-48.133	69.1069	POKER II		Christopher Mah	Paris (MNHN)	Ethanol
SOA516		MPE-2828	IE-2011-314		3562	SOA516-12	MPE-2828		Glabraster_antarctica	BOLD:AAB6633	Glabraster antarctica	Kerguelen	Chalut 148	Chalut 148	-49.8205	68.065	POKER II		Christopher Mah	Paris (MNHN)	Ethanol
SOA584		606_B			1533	SOA584-12	06_606_B		Glabraster_antarctica	BOLD:AAB6633	Glabraster antarctica	South Orkney Islands	PB-AGT-3	PB-AGT-3	-60.994	-46.832	JR144		Christopher Mah	Paris (MNHN)	Ethanol
SOA626		890_A			1538	SOA626-12	06_890_A		Glabraster_antarctica	BOLD:AAB6633	Glabraster antarctica	South-Georgia	Shelf	SR-AGT-4	-53.63	-40.902	JR144		Christopher Mah	Paris (MNHN)	Ethanol
SOA628		20			1532	SOA628-12	06_20		Glabraster_antarctica	BOLD:AAB6633	Glabraster antarctica	Patagonian shelf	Magellan shelf	FT-AGT-1B	-54.314	-56.68	JR144		Christopher Mah	Paris (MNHN)	Ethanol
SOA629		19			1531	SOA629-12	06_19		Glabraster_antarctica	BOLD:AAB6633	Glabraster antarctica	Patagonian shelf	Magellan shelf	FT-AGT-1B	-54.314	-56.68	JR144		Christopher Mah	Paris (MNHN)	Ethanol
SOA692		889_D			1534	SOA692-12	06_889_D		Glabraster_antarctica	BOLD:AAB6633	Glabraster antarctica	South-Georgia	Shelf	SR-AGT-4	-53.63	-40.902	JR144		Christopher Mah	Paris (MNHN)	Ethanol
SOA696		889_H			1537	SOA696-12	06_889_H		Glabraster_antarctica	BOLD:AAB6633	Glabraster antarctica	South-Georgia	Shelf	SR-AGT-4	-53.63	-40.902	JR144		Christopher Mah	Paris (MNHN)	Ethanol
SOA752		1142			1941	SOA752-12	06_1142		Glabraster_antarctica	BOLD:AAB6633	Glabraster antarctica	Antarctica	Weddle Sea	BIO4-AGT-3C	-74.405	-10.4611	JR179		Christopher Mah	Paris (MNHN)	Ethanol
TCTNB063	TCTNB063-15	XXVIII-716			4516	TCTNB063-15	XXVIII-716		Glabraster_antarctica	BOLD:AAB6633	Glabraster antarctica	Antarctica	Terra Nova Bay	Terra Nova Bay	-74.8215	164.579	XXVIII		Camille Moreau	Brussels (ULB)	Frozen
TCTNB066	TCTNB066-15	XXVIII-365			4515	TCTNB066-15	XXVIII-365		Glabraster_antarctica	BOLD:AAB6633	Glabraster antarctica	Antarctica	Terra Nova Bay	Terra Nova Bay	-74.8215	164.579	XXVIII		Camille Moreau	Brussels (ULB)	Frozen
TCTNB089	TCTNB089-15	XXVIII-1210a			4513	TCTNB089-15	XXVIII-1210a		Glabraster_antarctica	BOLD:AAB6633	Glabraster antarctica	Antarctica	Terra Nova Bay	Terra Nova Bay	-74.8215	164.579	XXVIII		Camille Moreau	Brussels (ULB)	Frozen
TCTNB090	TCTNB090-15	XXVIII-1210b			4514	TCTNB090-15	XXVIII-1210b		Glabraster_antarctica	BOLD:AAB6633	Glabraster antarctica	Antarctica	Terra Nova Bay	Terra Nova Bay	-74.8215	164.579	XXVIII		Camille Moreau	Brussels (ULB)	Frozen
TCTNB092	TCTNB092-15	XXVIII-1001			4512	TCTNB092-15	XXVIII-1001		Glabraster_antarctica	BOLD:AAB6633	Glabraster antarctica	Antarctica	Terra Nova Bay	Terra Nova Bay	-74.8215	164.579	XXVIII		Camille Moreau	Brussels (ULB)	Frozen
A11_As05									Henricia	No match		Magellan	Isla Alta		-52.4433	-74.2916
A11_As06									Henricia			Magellan	Isla Alta		-52.4433	-74.2916
FB1_As08									Henricia	No match		Magellan	Fuerte Bulnes		-53.6305	-70.9135
FB23_As01									Henricia			Magellan			-53.6279	-70.9153
FB23_As02									Henricia			Magellan			-53.6279	-70.9153
FB23_As03									Henricia			Magellan			-53.6279	-70.9153
FB23_As07									Henricia			Magellan			-53.6279	-70.9153
JR179_125_		125			33	ODTNB051-15	JR179-125		Labidiaster radiosus	BOLD:ACB6572 (98%)	Labidiaster annulatus	Antarctica	Antarctic peninsula	BIO1-AGT-3C	-68.53571	-76.20173	JR179	743	Camille Moreau	Brussels (ULB)	Ethanol
ACE_0131bis		ACE ASCCC 0131			4696				Labidiaster radiosus	BOLD:ACB6572 (98%)	Labidiaster annulatus	Kerguelen	Bank Skiff	213	-49.7278	64.896	ACE_2017	1629	Camille Moreau	Brussels (ULB)	Ethanol
FI1_As16									Labidiaster radiosus	BOLD:ACB6572 (98%)		Magellan	Faro san Isidro-1		-53.7843	-70.9752
FI1_As17									Labidiaster radiosus	BOLD:ACB6572 (98%)		Magellan	Faro san Isidro-1		-53.7843	-70.9752
FI1_As20									Labidiaster radiosus	BOLD:ACB6572 (98%)		Magellan	Faro san Isidro-1		-53.7843	-70.9752
FI1_As30									Labidiaster radiosus	BOLD:ACB6572 (98%)		Magellan	Faro san Isidro-1		-53.7843	-70.9752
FI1_As40									Labidiaster radiosus	BOLD:ACB6572 (98%)		Magellan	Faro san Isidro-2		-53.7883	-70.9721
FI1_As45									Labidiaster radiosus	BOLD:ACB6572 (98%)		Magellan	Faro san Isidro-2		-53.7883	-70.9721
RB3_As03									Labidiaster radiosus	BOLD:ACB6572 (98%)		Magellan	Punta Carreras		-53.5864	-70.924
RB3_As04									Labidiaster radiosus	BOLD:ACB6572 (98%)		Magellan	Punta Carreras		-53.5864	-70.924
RB3_As05									Labidiaster radiosus	BOLD:ACB6572 (98%)		Magellan	Punta Carreras		-53.5864	-70.924
RB3_As06									Labidiaster radiosus	BOLD:ACB6572 (98%)		Magellan	Punta Carreras		-53.5864	-70.924
RB3_As07									Labidiaster radiosus	BOLD:ACB6572 (98%)		Magellan	Punta Carreras		-53.5864	-70.924
BA_As02									Labidiaster radiosus			Magellan			-54.903	-68.1264
BA_As03									Labidiaster radiosus			Magellan			-54.903	-68.1264
PG_As02									Labidiaster radiosus			Magellan			-54.909	-67.8414
RB23_As02									Labidiaster radiosus			Magellan			-53.5964	-70.9355
RB23_As03									Labidiaster radiosus			Magellan			-53.5964	-70.9355
TBV_As06									Labidiaster radiosus			Magellan			-54.9267	-67.73
FB23_As11									Lophaster sp			Magellan			-53.6279	-70.9153
NZEC699-09_Lophaster									Lophaster sp			New zealand			-52.398	160.657
ODTNB031		PTK2_23			3927	ODTNB031-15	PTK2-Od1		Odontaster_penicillatus	BOLD:ABW1983	Odontaster penicillatus	Kerguelen	Iles du Princes de Monaco	Iles du Princes de Monaco (PTK2_CH14)	-49.6028	69.2462	Proteker II	284	Camille Moreau	Brussels (ULB)	Ethanol
ODTNB032		PTK2_29			3939	ODTNB032-15	PTK2-Od2		Odontaster_penicillatus	BOLD:ABW1983	Odontaster penicillatus	Kerguelen	Baie Philippe	Baie Philippe (PTK2_CH07)	-48.9258	69.3907	Proteker II	291	Camille Moreau	Brussels (ULB)	Ethanol
Odo004	PTK3_4, ASULB084-20	PTK3_4			5325				Odontaster_penicillatus		Odontaster penicillatus	Kerguelen	Port Christmas	Port Christmas (PTK3_PL08)	-48.6819	69.0327	Proteker III	1360	Camille Moreau	Brussels (ULB)	Ethanol
Odo005	PTK3_5, ASULB085-20	PTK3_5			5326				Odontaster_penicillatus		Odontaster penicillatus	Kerguelen	Ilot des Trois Bergers	Ilot des Trois Bergers (PTK3_PL14)	-49.2897	69.7111	Proteker III	1361	Camille Moreau	Brussels (ULB)	Ethanol
Odo017		ACE ASCCC 0271.4			4721				Odontaster_penicillatus		Odontaster sp	Kerguelen	272	272	-51.1471	71.758	ACE_2017	1648	Camille Moreau	Brussels (ULB)	Ethanol
Odo018		ACE ASCCC 0271.5			4722				Odontaster_penicillatus		Odontaster sp	Kerguelen	272	272	-51.1471	71.758	ACE_2017	1649	Camille Moreau	Brussels (ULB)	Ethanol
ACE_80.4		ACE ASCCC 0080.4			4692				Odontaster_penicillatus		Odontaster sp	Kerguelen	Bank Skiff	211	-49.7331	64.8713	ACE_2017	1655	Camille Moreau	Brussels (ULB)	Ethanol
ACE_137.1		ACE ASCCC 0137.1			4697				Odontaster_penicillatus		Odontaster sp	Kerguelen	Bank Skiff	213	-49.7278	64.896	ACE_2017	1659	Camille Moreau	Brussels (ULB)	Ethanol
ACE_137.2		ACE ASCCC 0137.2			4698				Odontaster_penicillatus		Odontaster sp	Kerguelen	Bank Skiff	213	-49.7278	64.896	ACE_2017	1660	Camille Moreau	Brussels (ULB)	Ethanol
Odo007		ACE ASCCC 0214.4			4706				Odontaster_penicillatus		Odontaster sp	Kerguelen	270	270	-51.1347	71.8448	ACE_2017	1678	Camille Moreau	Brussels (ULB)	Ethanol
Odo010		ACE ASCCC 0313.3			4785				Odontaster_penicillatus		Odontaster sp	Kerguelen	274	274	-51.1434	71.8443	ACE_2017	1693	Camille Moreau	Brussels (ULB)	Ethanol
Odo009		ACE ASCCC 0313.2			4784				Odontaster_penicillatus		Odontaster sp	Kerguelen	274	274	-51.1434	71.8443	ACE_2017	1705	Camille Moreau	Brussels (ULB)	Ethanol
ODTNB033		PTK2_8			3967	ODTNB033-15	PTK2-Od3		Odontaster_penicillatus	BOLD:ABW1983	Odontaster penicillatus	Kerguelen	Ile Haute	Ile Haute (PTK2_PL03)	-49.3875	69.9415	Proteker II	274, 298, 316	Camille Moreau	Brussels (ULB)	Ethanol
ODTNB062	JR144-43.1	43.1			1600	ODTNB062-15	JR144-43.1		Odontaster_penicillatus	BOLD:ABW1983	Odontaster meridionalis			FT-AGT-1B			JR144	299;306;306';308;314	Camille Moreau	Brussels (ULB)	Ethanol
PTK6_145.1		PTK6_145.1			5988				Odontaster_penicillatus		Odontaster penicillatus	Kerguelen	Ile Haute	Ile Haute (PTK6_PL)	-49.3875	69.9412	Proteker VI	IMG_2355, IMG_2354	Camille Moreau	Brussels (ULB)	Ethanol
A11_As16									Odontaster_penicillatus			Magellan	Isla Alta		-52.4433	-74.2916
ASULB1977-21	Uni_Mag_FB10	FB10			5001				Odontaster_penicillatus		Odontaster penicillatus	Magellan	Fuerte Bulnes	Fuerte Bulnes	-53.627	-70.919	Uni_Magellan		Camille Moreau	Brussels (ULB)	Dry
EL 01									Odontaster_penicillatus			Magellan	Seno Eleuterio		-50.3189	-75.305
FB1_As09									Odontaster_penicillatus			Magellan	Fuerte Bulnes		-53.6305	-70.9135
FB1_As10									Odontaster_penicillatus			Magellan	Fuerte Bulnes		-53.6305	-70.9135
FB1_As11									Odontaster_penicillatus			Magellan	Fuerte Bulnes		-53.6305	-70.9135
FB1_As12									Odontaster_penicillatus			Magellan	Fuerte Bulnes		-53.6305	-70.9135
FB1_As13									Odontaster_penicillatus			Magellan	Fuerte Bulnes		-53.6305	-70.9135
FB1_As14									Odontaster_penicillatus			Magellan	Fuerte Bulnes		-53.6305	-70.9135
FB1_As15									Odontaster_penicillatus			Magellan	Fuerte Bulnes		-53.6305	-70.9135
FB1_As16									Odontaster_penicillatus			Magellan	Fuerte Bulnes		-53.6305	-70.9135
FB1_As18									Odontaster_penicillatus			Magellan	Fuerte Bulnes		-53.6305	-70.9135
FI1_As32									Odontaster_penicillatus			Magellan	Faro san Isidro-1		-53.7843	-70.9752
FI1_As34									Odontaster_penicillatus			Magellan	Faro san Isidro-1		-53.7843	-70.9752
GBEHA397-13_Odontaster	As79				10087	GBEHA397-13		GQ294379	Odontaster_penicillatus	BOLD:ABW1983	Odontaster penicillatus	Patagonian shelf	Magellanic shelf	LMG 04-07	-54.27	-63.52	Genbank			Mined from GenBank, NCBI
GBEHA398-13_Odontaster	As78				10088	GBEHA398-13		GQ294378	Odontaster_penicillatus	BOLD:ABW1983	Odontaster penicillatus	Patagonian shelf	Magellanic shelf	LMG 04-07	-54.27	-63.52	Genbank			Mined from GenBank, NCBI
GBEHA409-13_Odontaster	As49				10099	GBEHA409-13		GQ294367	Odontaster_penicillatus	BOLD:ABW1983	Odontaster penicillatus	Falkland Islands	Falkland Islands	LMG 16-19	-52.6	-59.01	Genbank			Mined from GenBank, NCBI
GBEHA411-13_Odontaster	As47				10101	GBEHA411-13		GQ294365	Odontaster_penicillatus	BOLD:ABW1983	Odontaster penicillatus	South-Georgia	38-18	38-18	-5355	-37	Genbank			Mined from GenBank, NCBI
GBEHA412-13_Odontaster	As42				10102	GBEHA412-13		GQ294364	Odontaster_penicillatus	BOLD:ABW1983	Odontaster penicillatus	Patagonian shelf	Magellanic shelf	LMG 04-14	-54.41	-59.23	Genbank			Mined from GenBank, NCBI
GBEHA413-13_Odontaster	As37				10103	GBEHA413-13		GQ294363	Odontaster_penicillatus	BOLD:ABW1983	Odontaster meridionalis	Patagonian shelf	Magellanic shelf	LMG 04-07	-54.27	-63.52	Genbank			Mined from GenBank, NCBI
GBEHA420-13_Odontaster	As23				10110	GBEHA420-13		GQ294356	Odontaster_penicillatus	BOLD:ABW1983	Odontaster penicillatus	Patagonian shelf	Magellanic shelf	LMG 06-09	-54.29	-62.12	Genbank			Mined from GenBank, NCBI
GBEHA422-13_Odontaster	As21				10112	GBEHA422-13		GQ294354	Odontaster_penicillatus	BOLD:ABW1983	Odontaster penicillatus	Patagonian shelf	Magellanic shelf	LMG 06-04	-53.57	-60.42	Genbank			Mined from GenBank, NCBI
GBEHA432-13_Odontaster	As6				10122	GBEHA432-13		GQ294344	Odontaster_penicillatus	BOLD:ABW1983	Odontaster penicillatus	Patagonian shelf	Magellanic shelf	LMG 04-07	-54.27	-63.52	Genbank			Mined from GenBank, NCBI
GBEHA433-13_Odontaster	As5				10123	GBEHA433-13		GQ294343	Odontaster_penicillatus	BOLD:ABW1983	Odontaster penicillatus	Patagonian shelf	Magellanic shelf	LMG 04-07	-54.27	-63.52	Genbank			Mined from GenBank, NCBI
GBEHA436-13_Odontaster	As2				10126	GBEHA436-13		GQ294340	Odontaster_penicillatus	BOLD:ABW1983	Odontaster penicillatus	Patagonian shelf	Magellanic shelf	LMG 04-07	-54.27	-63.52	Genbank			Mined from GenBank, NCBI
GBEHA437-13_Odontaster	As1				10127	GBEHA437-13		GQ294339	Odontaster_penicillatus	BOLD:ABW1983	Odontaster penicillatus	Patagonian shelf	Magellanic shelf	LMG 04-02	-53.24	-66.57	Genbank			Mined from GenBank, NCBI
ODTNB304-15									Odontaster_penicillatus
PH10 ERREUR!!! C. verrucosa		PH10			5095				Odontaster_penicillatus		Cycethra verrucosa	Magellan	Puerto del Hambre	Puerto del Hambre	-53.6085	-70.9322	Uni_Magellan		Camille Moreau	Brussels (ULB)	Dry
PM 03									Odontaster_penicillatus			Magellan	Pia Morrena		-54.8431	-69.6751
SOA051		MPE-207	IE-2011-520		3739	SOA051-12	MPE-207		Odontaster_penicillatus	BOLD:ABW1983	Odontaster meridionalis	Kerguelen	Chalut 11	Chalut 11	-47.5937	68.6113	POKER II		Christopher Mah	Paris (MNHN)	Ethanol
SOA093		MPE-420	IE-2011-602		3747	SOA093-12	MPE-420		Odontaster_penicillatus	BOLD:ABW1983	Odontaster meridionalis	Kerguelen	Chalut 121	Chalut 121	-50.2172	69.8417	POKER II		Christopher Mah	Paris (MNHN)	Ethanol
SOA134		MPE-667	IE-2011-701		3748	SOA134-12	MPE-667		Odontaster_penicillatus	BOLD:ABW1983	Odontaster meridionalis	Kerguelen	Chalut 182		-49.9945	65.043	POKER II		Christopher Mah	Paris (MNHN)	Ethanol
SOA212		MPE-1056	IE-2011-870		3730	SOA212-12	MPE-1056		Odontaster_penicillatus	BOLD:ABW1983	Odontaster meridionalis	Kerguelen	Chalut 41		-48.1602	68.6017	POKER II		Christopher Mah	Paris (MNHN)	Ethanol
SOA241		MPE-1228	IE-2011-939		3733	SOA241-12	MPE-1228		Odontaster_penicillatus	BOLD:ABW1983	Odontaster meridionalis	Kerguelen	Chalut 48		-48.0623	70.2017	POKER II		Christopher Mah	Paris (MNHN)	Ethanol
SOA284		MPE-1475	IE-2011-1047		3735	SOA284-12	MPE-1475		Odontaster_penicillatus	BOLD:ABW1983	Odontaster meridionalis	Kerguelen	Chalut 39	Chalut 39	-48.3652	68.4715	POKER II		Christopher Mah	Paris (MNHN)	Ethanol
SOA300		MPE-1543	IE-2011-1083		3736	SOA300-12	MPE-1543		Odontaster_penicillatus	BOLD:ABW1983	Odontaster meridionalis	Kerguelen	Chalut 38	Chalut 38	-48.1202	68.17	POKER II		Christopher Mah	Paris (MNHN)	Ethanol
SOA347		MPE-1787	IE-2011-1197		3738	SOA347-12	MPE-1787		Odontaster_penicillatus	BOLD:ABW1983	Odontaster meridionalis	Kerguelen	Chalut 31	Chalut 31	-48.3489	67.6791	POKER II		Christopher Mah	Paris (MNHN)	Ethanol
SOA408		MPE-2119	IE-2011-9		3740	SOA408-12	MPE-2119		Odontaster_penicillatus		Odontaster meridionalis	Kerguelen	Chalut 40		-48.242	68.5551	POKER II		Christopher Mah	Paris (MNHN)	Ethanol
SOA450		MPE-2381	IE-2011-99		3751	SOA450-12	MPE-2381		Odontaster_penicillatus		Odontaster sp	Kerguelen	Chalut 58		-48.0443	69.5455	POKER II		Christopher Mah	Paris (MNHN)	Ethanol
SOA451		MPE-2382	IE-2011-100		3741	SOA451-12	MPE-2382		Odontaster_penicillatus		Odontaster meridionalis	Kerguelen	Chalut 58	Chalut 58	-48.0443	69.5455	POKER II		Christopher Mah	Paris (MNHN)	Ethanol
SOA462		MPE-2434	IE-2011-131		3742	SOA462-12	MPE-2434		Odontaster_penicillatus		Odontaster meridionalis	Kerguelen	Chalut 56	Chalut 56	-48.133	69.1069	POKER II		Christopher Mah	Paris (MNHN)	Ethanol
SOA479		MPE-2561	IE-2011-196		3743	SOA479-12	MPE-2561		Odontaster_penicillatus	BOLD:ABW1983	Odontaster meridionalis	Kerguelen	Chalut 86	Chalut 86	-49.4607	70.8212	POKER II		Christopher Mah	Paris (MNHN)	Ethanol
SOA496		MPE-2676	IE-2011-1331		3744	SOA496-12	MPE-2676		Odontaster_penicillatus	BOLD:ABW1983	Odontaster meridionalis	Kerguelen	Chalut 144	Chalut 144	-49.9121	68.3833	POKER II		Christopher Mah	Paris (MNHN)	Ethanol
SOA524		MPE-2908	IE-2011-338		3745	SOA524-12	MPE-2908		Odontaster_penicillatus	BOLD:ABW1983	Odontaster meridionalis	Kerguelen	Chalut 129	Chalut 129	-50.0453	69.6181	POKER II		Christopher Mah	Paris (MNHN)	Ethanol
SOA525		MPE-2909	IE-2011-339		3746	SOA525-12	MPE-2909		Odontaster_penicillatus	BOLD:ABW1983	Odontaster meridionalis	Kerguelen	Chalut 129	Chalut 129	-50.0453	69.6181	POKER II		Christopher Mah	Paris (MNHN)	Ethanol
BA_As01									Odontaster_penicillatus			Magellan			-54.903	-68.1264
BA_As13									Odontaster_penicillatus			Magellan			-54.903	-68.1264
TBV_As03									Odontaster_penicillatus			Magellan			-54.9267	-67.73
TBV_As04									Odontaster_penicillatus			Magellan			-54.9267	-67.73
BA_As08									Perknaster			Magellan			-54.903	-68.1264
BM_As01									Perknaster			Magellan			-54.8983	-67.9801
FB23_As10									Perknaster			Magellan			-53.6279	-70.9153
PG_As01									Perknaster			Magellan			-54.909	-67.8414
PW_As07									Perknaster			Magellan			-54.9293	-67.5726
SORK044	JR15005_1698-6, SORK044-17	1698.6			4654	SORK044-17	JR15005_1698-6		Pteraster_affinis	BOLD:AAC7424	Undet	South Orkney Islands	81	81	-62.1542	-44.9902	JR15005	32	Camille Moreau	Brussels (ULB)	Ethanol
PTK2_6		PTK2_6			3965				Pteraster_affinis	BOLD:AAC7424	Pteraster affinis	Kerguelen	Ile Haute	Ile Haute (PTK2_PL03)	-49.3875	69.9415	Proteker II	273	Camille Moreau	Brussels (ULB)	Ethanol
ODTNB073	JR262-811	811			2139	ODTNB073-15	JR262-811		Pteraster_affinis	BOLD:AAC7424	Pterasteridae	South-Georgia	Event-44	Event-44	-54.9844	-35.7615	JR262	473	Camille Moreau	Brussels (ULB)	Ethanol
SORK157	JR15005_644-4, SORK157-17	644.4			4585	SORK157-17	JR15005_644-4		Pteraster_affinis	BOLD:AAC7424	Pteraster sp	South Orkney Islands	32	32	-60.4589	-44.7044	JR15005	DSC_1513,1514	Camille Moreau	Brussels (ULB)	Ethanol
PTK6_65.1		PTK6_65.1			5951				Pteraster_affinis	BOLD:AAC7424	Pteraster affinis	Kerguelen	Ile Longue	Ile Longue (PTK6_PL)	-49.5385	69.8842	Proteker VI	IMG_2542, IMG_2543	Camille Moreau	Brussels (ULB)	Ethanol
DSPEC622					6460	DSPEC622-08			Pteraster_affinis	BOLD:AAC7424	Pteraster militaris	Canada	Nanaimo, Departure Bay	BAM00173	49.2085	-125.952	DSPEC		Erin Corstorphine	Centre for Biodiversity Genomics
FB1_As19									Pteraster_affinis	BOLD:AAC7424		Magellan	Fuerte Bulnes		-53.6305	-70.9135
PTK8_105.2		PTK8_105.2			11798				Pteraster_affinis	BOLD:AAC7424	Pteraster affinis	Kerguelen	Iles du Prince de Monaco	Iles du Prince de Monaco	-49.6003	69.2403	Proteker VIII		Camille Moreau	Brussels (ULB)	Ethanol
SOA037		MPE-154	IE-2011-496		3765	SOA037-12	MPE-154		Pteraster_affinis	BOLD:AAC7424	Pteraster affinis	Kerguelen	Chalut 53	Chalut 53	-48.4399	70.6003	POKER II		Christopher Mah	Paris (MNHN)	Ethanol
SOA038		MPE-155	IE-2011-499		3766	SOA038-12	MPE-155		Pteraster_affinis	BOLD:AAC7424	Pteraster affinis	Kerguelen	Chalut 53	Chalut 53	-48.4399	70.6003	POKER II		Christopher Mah	Paris (MNHN)	Ethanol
SOA039		MPE-162	IE-2011-501		3768	SOA039-12	MPE-162		Pteraster_affinis	BOLD:AAC7424	Pteraster affinis	Kerguelen	Chalut 53	Chalut 53	-48.4399	70.6003	POKER II		Christopher Mah	Paris (MNHN)	Ethanol
SOA085		MPE-359	IE-2011-573		3783	SOA085-12	MPE-359		Pteraster_affinis	BOLD:AAC7424	Pteraster affinis	Kerguelen	Chalut 124	Chalut 124	-50.0106	70.6959	POKER II		Christopher Mah	Paris (MNHN)	Ethanol
SOA088		MPE-390	IE-2011-588		3784	SOA088-12	MPE-390		Pteraster_affinis	BOLD:AAC7424	Pteraster affinis	Kerguelen	Chalut 186	Chalut 186	-49.7772	64.8639	POKER II		Christopher Mah	Paris (MNHN)	Ethanol
SOA171		MPE-838	IE-2011-786		3785	SOA171-12	MPE-838		Pteraster_affinis	BOLD:AAC7424	Pteraster affinis	Kerguelen	Chalut 7		-47.0283	67.9636	POKER II		Christopher Mah	Paris (MNHN)	Ethanol
SOA322		MPE-1649	IE-2011-1128		3769	SOA322-12	MPE-1649		Pteraster_affinis	BOLD:AAC7424	Pteraster affinis	Kerguelen	Chalut 47	Chalut 47	-47.9601	69.8665	POKER II		Christopher Mah	Paris (MNHN)	Ethanol
SOA323		MPE-1650	IE-2011-1129		3770	SOA323-12	MPE-1650		Pteraster_affinis	BOLD:AAC7424	Pteraster affinis	Kerguelen	Chalut 47	Chalut 47	-47.9601	69.8665	POKER II		Christopher Mah	Paris (MNHN)	Ethanol
SOA381		MPE-1962	IE-2011-1269		3771	SOA381-12	MPE-1962		Pteraster_affinis	BOLD:AAC7424	Pteraster affinis	Kerguelen	Chalut 34	Chalut 34	-48.6268	67.7128	POKER II		Christopher Mah	Paris (MNHN)	Ethanol
SOA489		MPE-2622	IE-2011-222		3776	SOA489-12	MPE-2622		Pteraster_affinis	BOLD:AAC7424	Pteraster affinis	Kerguelen	Chalut 85	Chalut 85	-49.611	70.6347	POKER II		Christopher Mah	Paris (MNHN)	Ethanol
SOA490		MPE-2623	IE-2011-223		3777	SOA490-12	MPE-2623		Pteraster_affinis	BOLD:AAC7424	Pteraster affinis	Kerguelen	Chalut 85	Chalut 85	-49.611	70.6347	POKER II		Christopher Mah	Paris (MNHN)	Ethanol
SOA619									Pteraster_affinis	BOLD:AAC7424		Patagonian shelf	Magellan shelf		-54.314	-56.68
FB23_As09									Pteraster_affinis	BOLD:AAC7424		Magellan			-53.6279	-70.9153
FB23_As16									Pteraster_affinis	BOLD:AAC7424		Magellan			-53.6279	-70.9153
PTK3_11									Pteraster_affinis	BOLD:AAC7424		Kerguelen
ASULB1479-21									Pteraster_gibber			Crozet
ECHNO010-15									Pteraster_gibber			Crozet			-46.3823	51.8264
FB23_As18									Pteraster_gibber			Magellan			-53.6279	-70.9153
PTE178									Pteraster_gibber			Kerguelen
PTESO014-22									Pteraster_gibber			Patagonian shelf
SOA024-12									Pteraster_gibber			Kerguelen	Chalut 32		-48.445	67.802
SOA100-12									Pteraster_gibber			Kerguelen	Chalut 172		-49.4374	68.7672
SOA172-12									Pteraster_gibber			Kerguelen	Chalut 169		-49.4374	68.7672
SOA440-12									Pteraster_gibber			Kerguelen	Chalut 57		-49.4374	68.7672
SOA528-12									Pteraster_gibber			Kerguelen	Chalut 145		-49.4374	68.7672
FB1_As01									Solaster_regularis			Magellan	Fuerte Bulnes		-53.6305	-70.9135
FB1_As05									Solaster_regularis			Magellan	Fuerte Bulnes		-53.6305	-70.9135
FB1_As06									Solaster_regularis			Magellan	Fuerte Bulnes		-53.6305	-70.9135
FB1_As07									Solaster_regularis			Magellan	Fuerte Bulnes		-53.6305	-70.9135
FB1_As20									Solaster_regularis			Magellan	Fuerte Bulnes		-53.6305	-70.9135
FB1_As21									Solaster_regularis			Magellan	Fuerte Bulnes		-53.6305	-70.9135
FB1_As22									Solaster_regularis			Magellan	Fuerte Bulnes		-53.6305	-70.9135
IE-2011-821_		MPE-935	IE-2011-821		3874				Solaster_regularis		Solaster regularis	Kerguelen	Kerguelen	Chalut 171	-49.4374	68.7672	POKER II		Christopher Mah	Paris (MNHN)	Ethanol
NZECA192		NZECA192			3218	NZECA192-10	45559		Solaster_regularis	BOLD:AAM2777	Solaster regularis	Atlantic	Z3826	Z3826	-47	-38	NZECA		Christopher Mah	Wellington (NIWA)	Unknown
SOA015		MPE-72	IE-2011-463		3870	SOA015-12	MPE-72		Solaster_regularis	BOLD:AAM2777	Solaster regularis	Kerguelen	Chalut 44	Chalut 44	-47.5454	69.4809	POKER II		Christopher Mah	Paris (MNHN)	Ethanol
SOA097		MPE-468	IE-2011-614		3868	SOA097-12	MPE-468		Solaster_regularis	BOLD:AAM2777	Solaster regularis	Kerguelen	Chalut 117	Chalut 117	-50.6571	69.7457	POKER II		Christopher Mah	Paris (MNHN)	Ethanol
SOA562		MPE-3076	IE-2011-411		3867	SOA562-12	MPE-3076		Solaster_regularis	BOLD:AAM2777	Solaster regularis	Kerguelen	Chalut 76	Chalut 76	-47.6055	71.8521	POKER II		Christopher Mah	Paris (MNHN)	Ethanol
BA_As09									Solaster_regularis			Magellan			-54.903	-68.1264
FB23_As05_M13-FP									Solaster_regularis			Magellan			-53.6279	-70.9153
FB23_As08									Solaster_regularis			Magellan			-53.6279	-70.9153
FB23_As12									Solaster_regularis			Magellan			-53.6279	-70.9153
FB23_As13									Solaster_regularis			Magellan			-53.6279	-70.9153
FB23_As14									Solaster_regularis			Magellan			-53.6279	-70.9153
FB23_As15									Solaster_regularis			Magellan			-53.6279	-70.9153
RB23_As04_M13R-pUC									Solaster_regularis			Magellan			-53.5964	-70.9355
